# Supplementary material for: Independent and combined effects of biotin and hemolysis on high-sensitivity cardiac troponin assays
Source: publisher site journal article supplement (doi:10.1515/cclm-2021-0124), 2021-03-24

Supplemental Data

Supplemental Table 1. Manufacturer-reported analytical and clinical characteristics of the hscTn assays evaluated in this study, including the limit of detection (LoD), minimum concentration with CV ≤10% (C10% CV), 99th percentile upper reference limit (99th% URL) overall (O) and for females (F) and males (M).

| Assay | Package Insert Date, version | LoD (ng/L) | C10 or 20% CV (ng/L) | 99th%URL (ng/L) |
| --- | --- | --- | --- | --- |
| Abbott Alinity cTnI | January 2017, B8P130 | 1.6 | 5.1 (10% CV) | O: 26.2  F: 15.6  M: 34.2 |
| Abbott Architect cTnI | September 2019, B2R980 | 1.7 | 3.5 (20% CV) | O: 28  F: 17  M: 35 |
| Beckman Access 2 cTnI | August 2018, C09448 A | 1.5-2.3 | 1.2-2.3 (20% CV) | O: 17.9  F: 14.9  M: 19.8 |
| Ortho VITROS XT 7600 cTnI | January 2019, V 1.0 GEM1320_XUS_EN | 0.42 | 1.23 (20% CV) | O: 11  F: 9  M: 13 |
| Roche Cobas 411 cTnT | July 2020, V 8.0 | 5 (overall)  4.72 (e411)  2.05 (E170, e601, e602) | 13 (overall)  (10% CV) | O: 14  F: -  M: - |
| Roche Cobas 411 v2 cTnT | May 2020, V 2.0 | 2.54 (e411)  3.16 (e601, e602) | 7.45 (e411)  3.82 (e601, e602) (10% CV) | O: 14  F: 9  M: 16.8 |
| Siemens Atellica cTnI | December 2018, 11200498_EN Rev. 05 | 1.6 | 2.5 (20% CV) | O: 45.4  F: 38.6  M: 53.5 |
| Siemens Centaur cTnI | March 2020, 11200077_EN Rev. F | 1.6 | 2.5 (20% CV) | O: 47.3  F: 37.0  M: 57.3 |
| Siemens Dimension EXL cTnI | August 2019, F PN11417099 - US | 2.7 | 4.0 (20% CV) | O: 60.4  F: 51.4  M: 76.2 |

Supplemental Figure 1. Observed troponin concentration as a function of spiked hemoglobin or biotin concentration for nine hscTn assays. Four plots are included for each assay: first, troponin concentration vs. biotin concentration at four levels of hemolysis (low troponin pool); second, troponin concentration vs. biotin concentration at four levels of hemolysis (high troponin pool); third, troponin concentration vs. hemoglobin concentration (low troponin pool); fourth, troponin concentration vs. hemoglobin concentration (high troponin pool). Two additional troponin concentration vs biotin concentration plots with alternate axes are included for the Roche Elecsys TnT. Dotted lines indicate 90 and 110% recovery (high troponin pool) and ±2 ng/L recovery (low troponin pool).


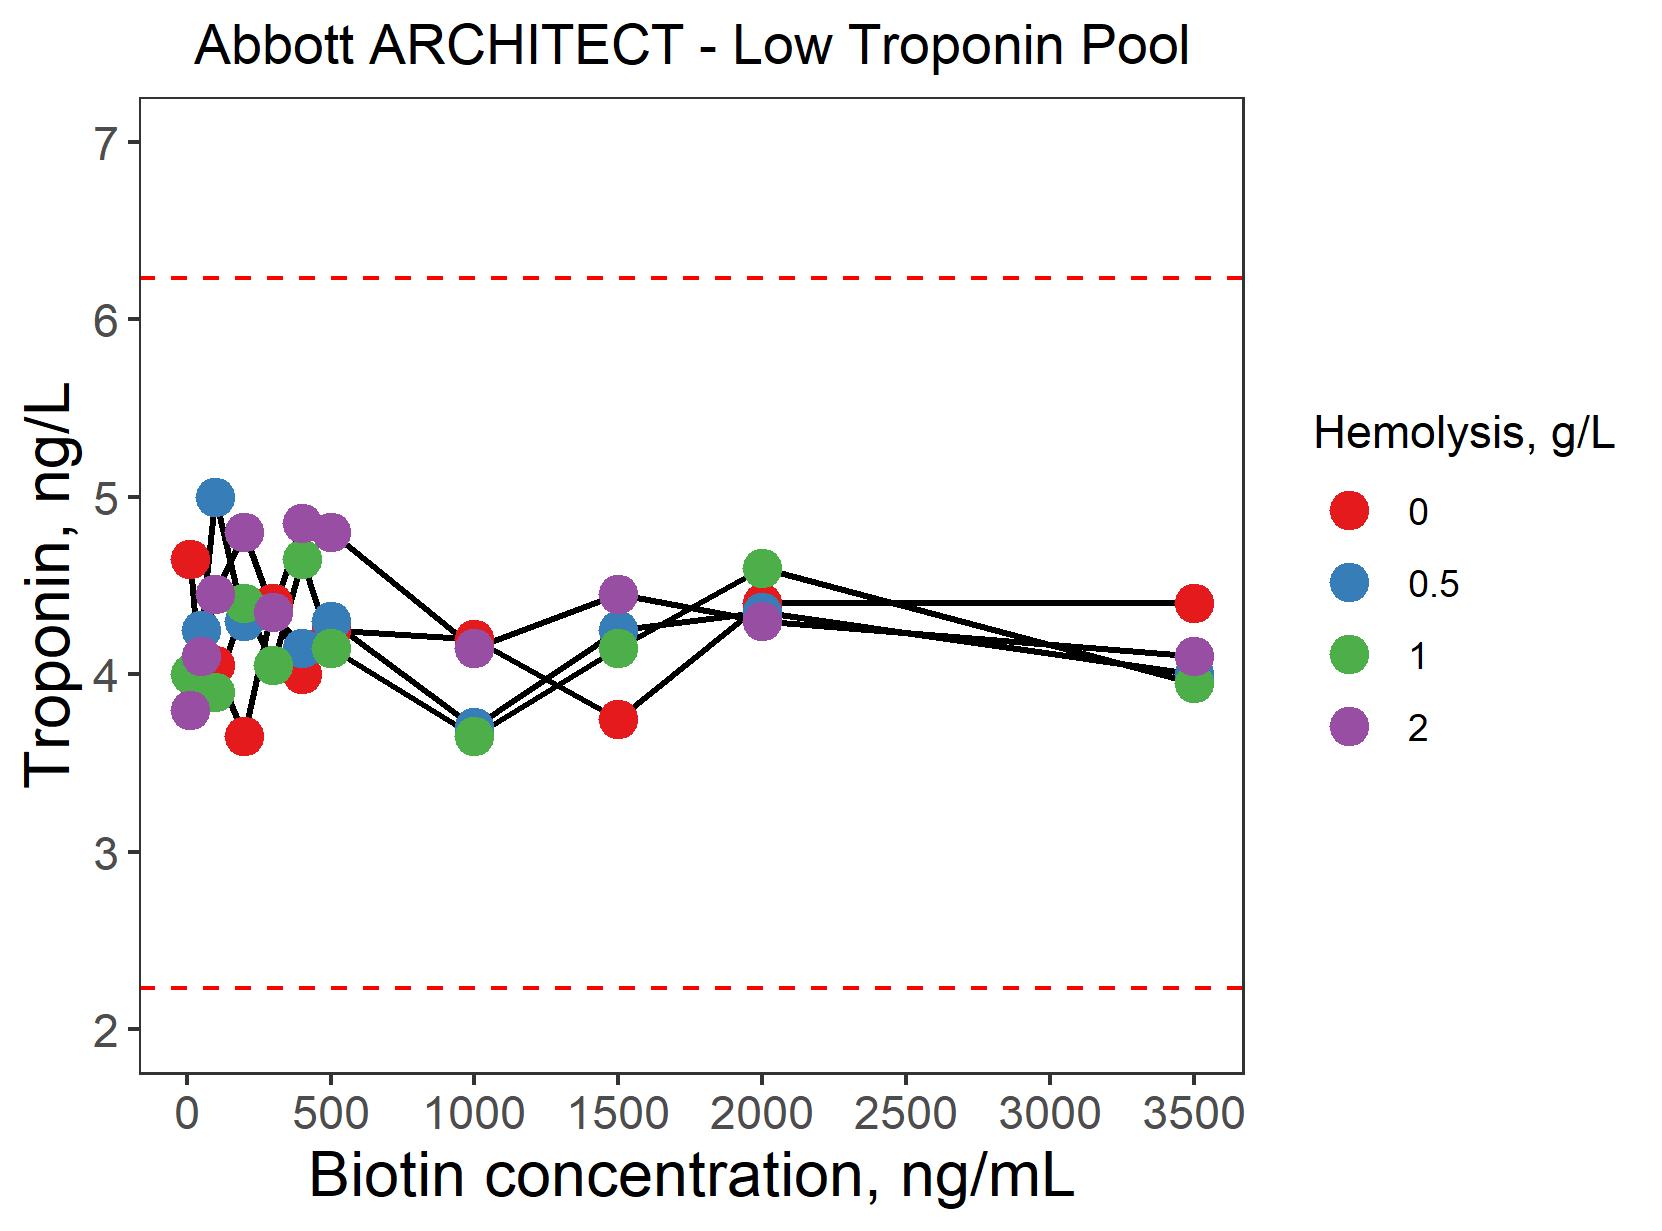

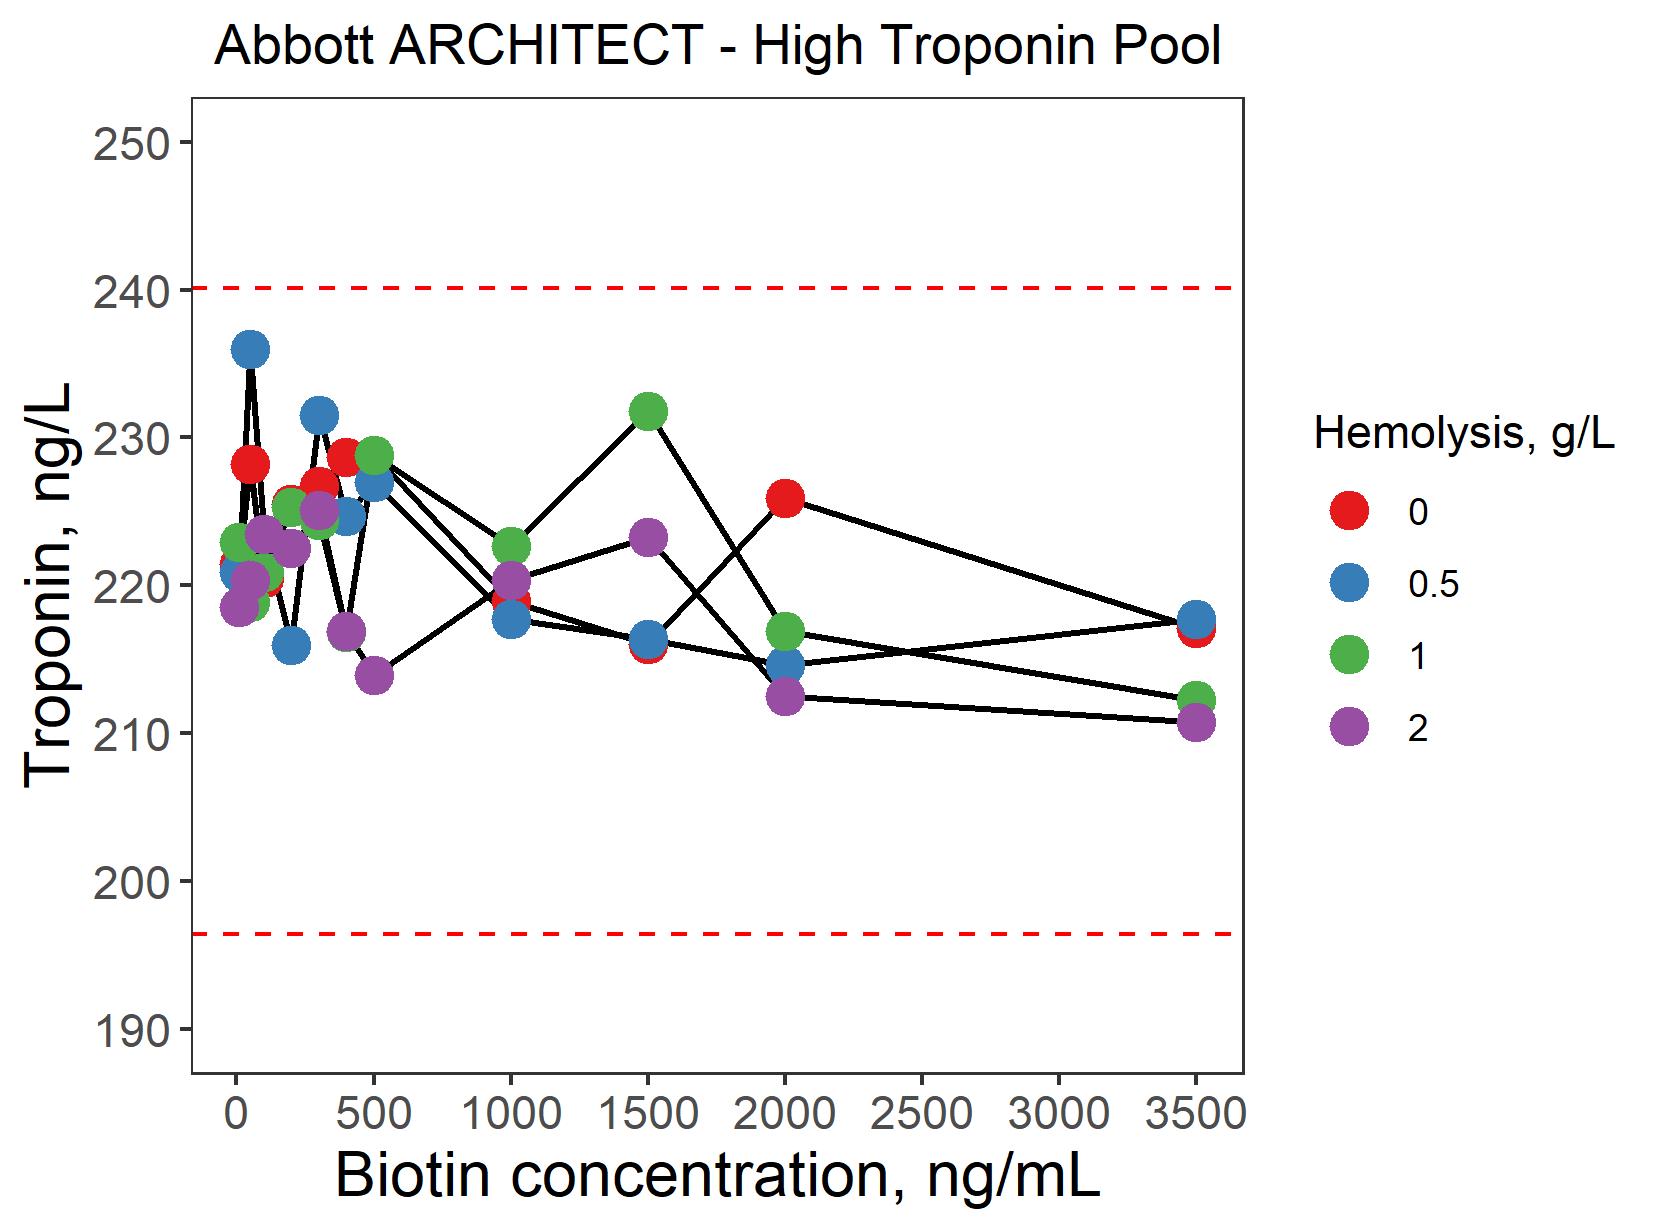

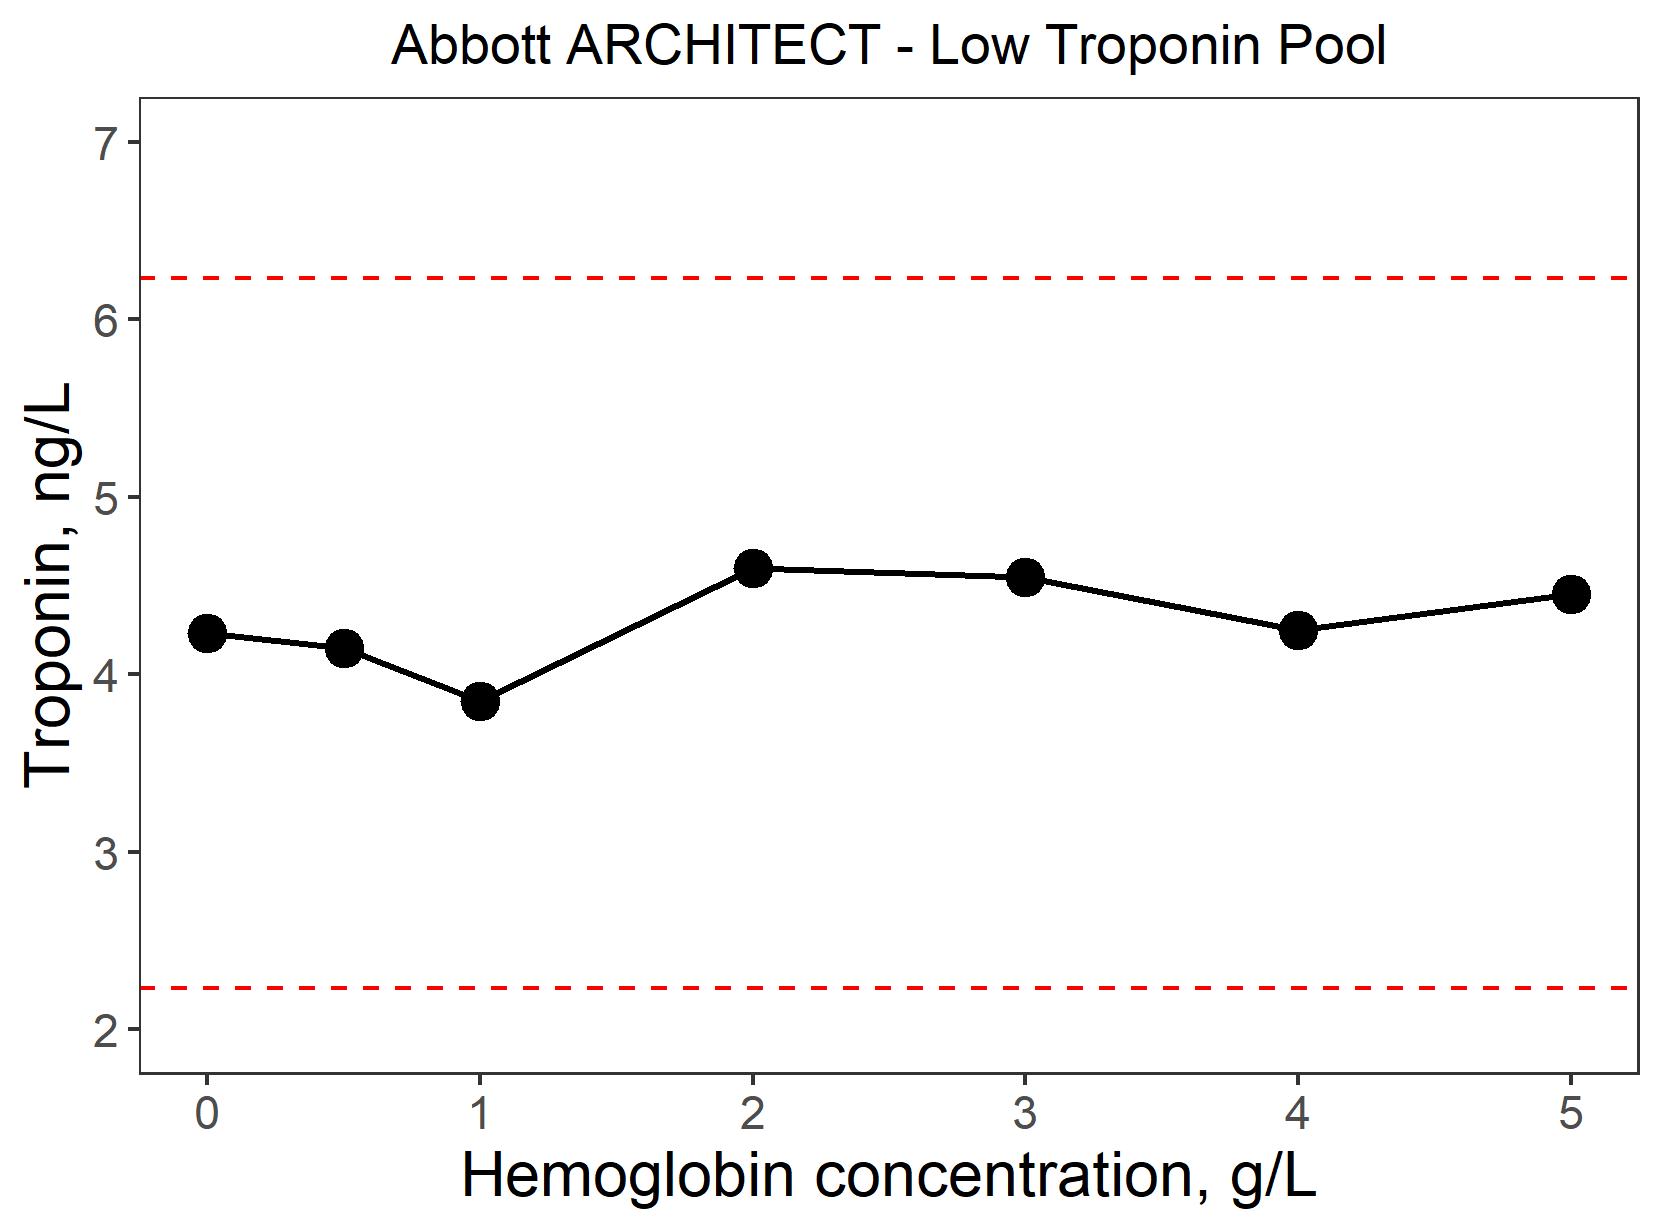

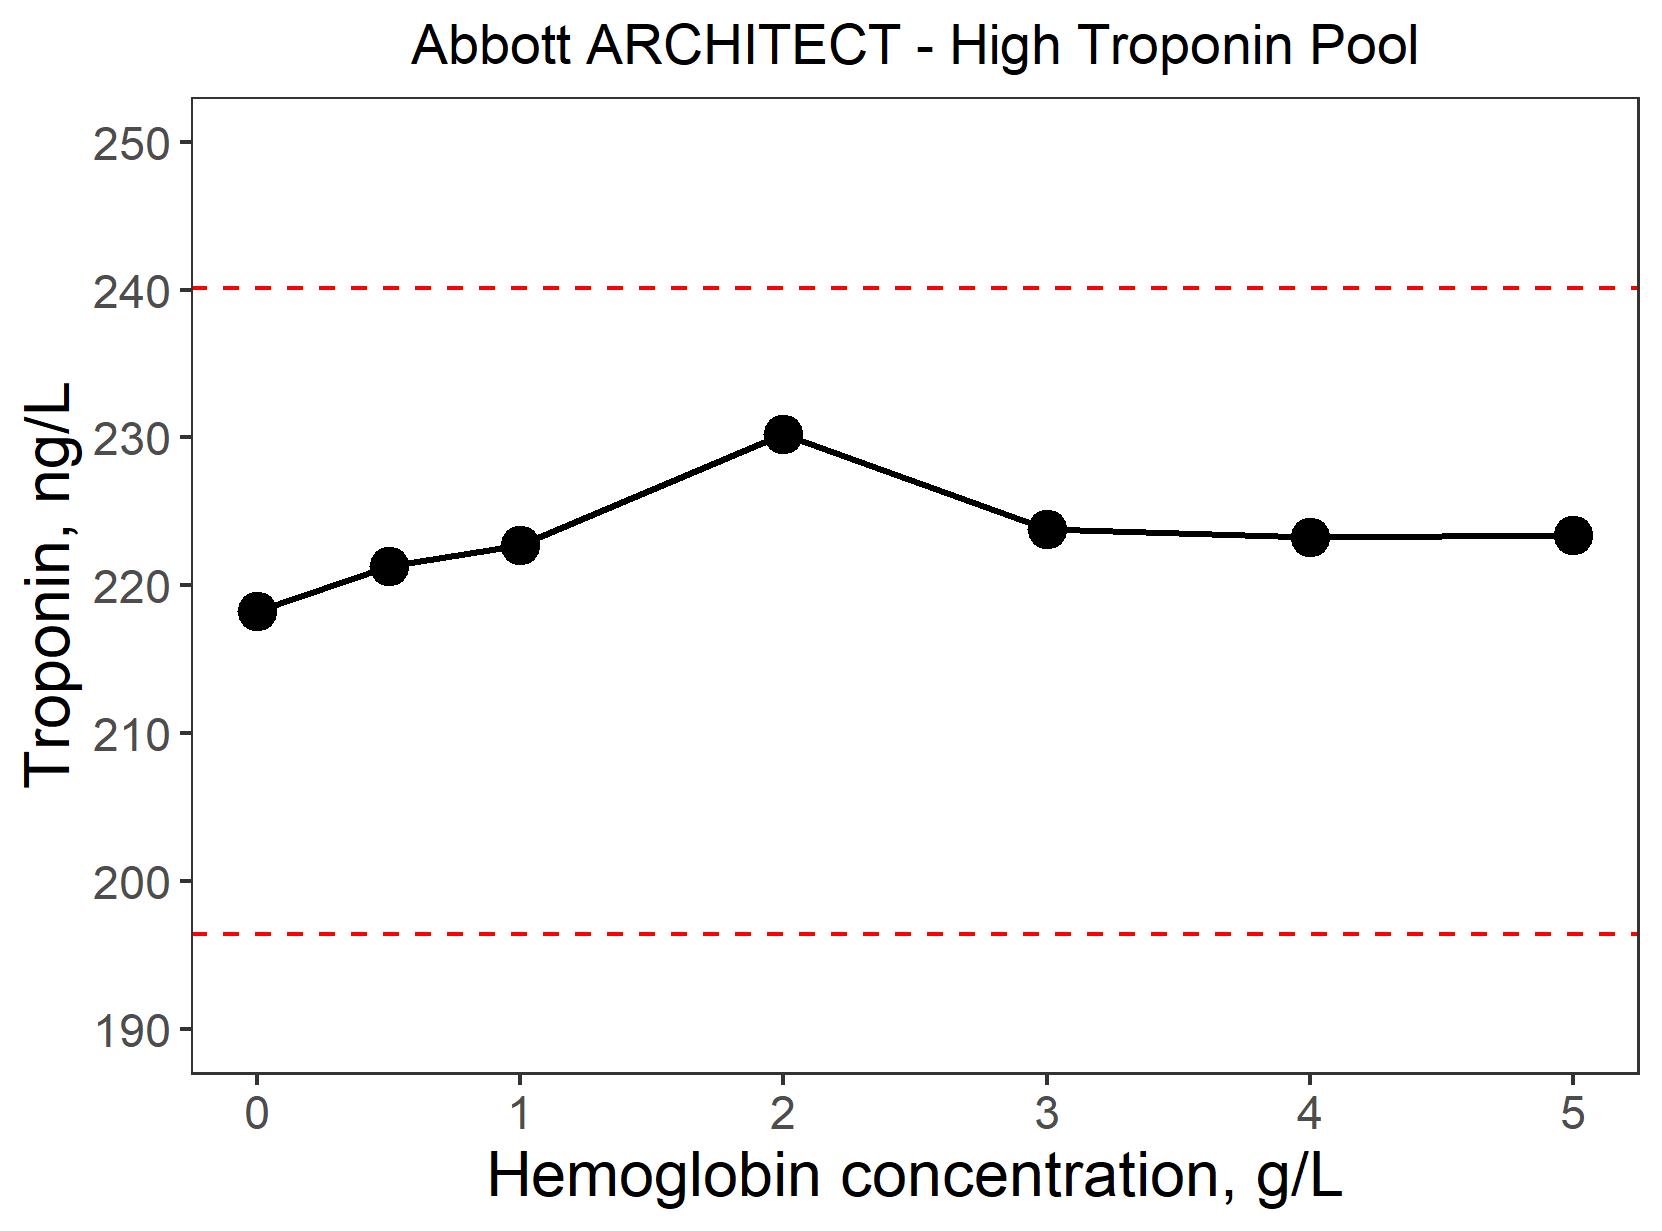

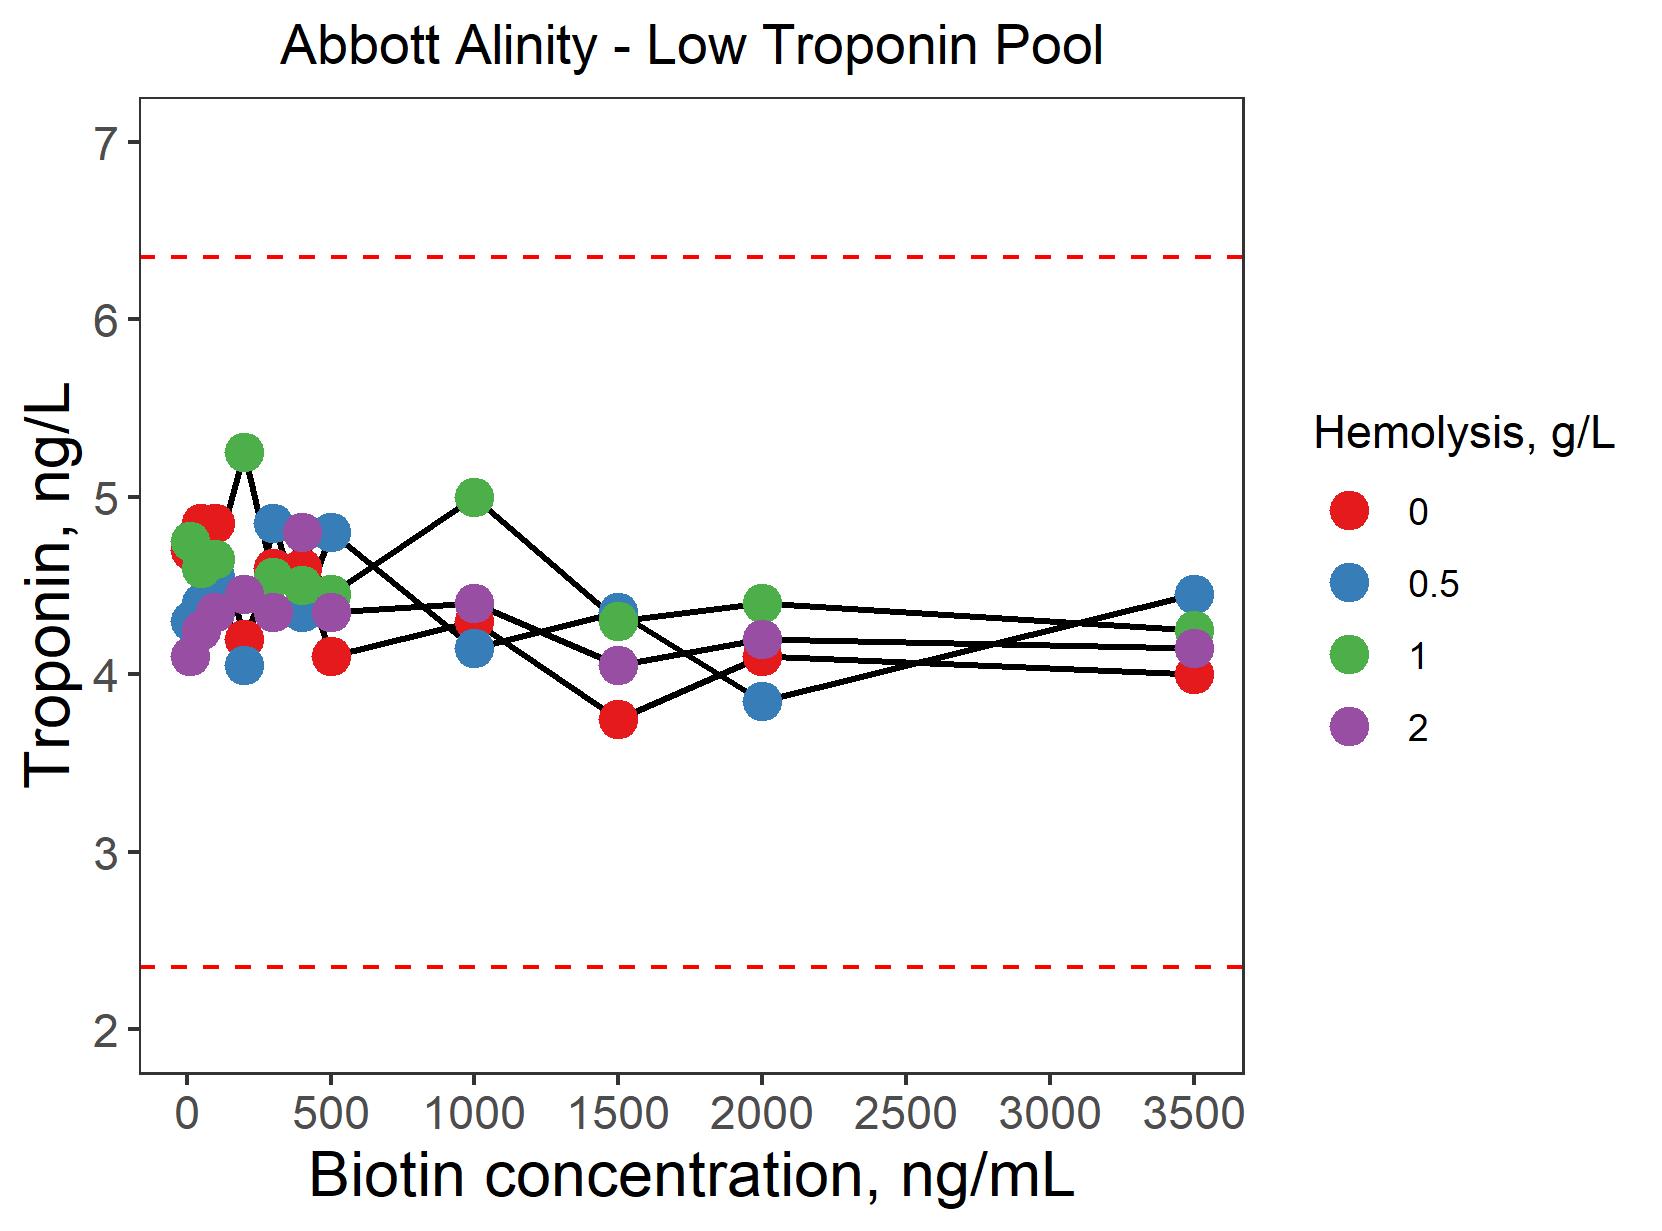

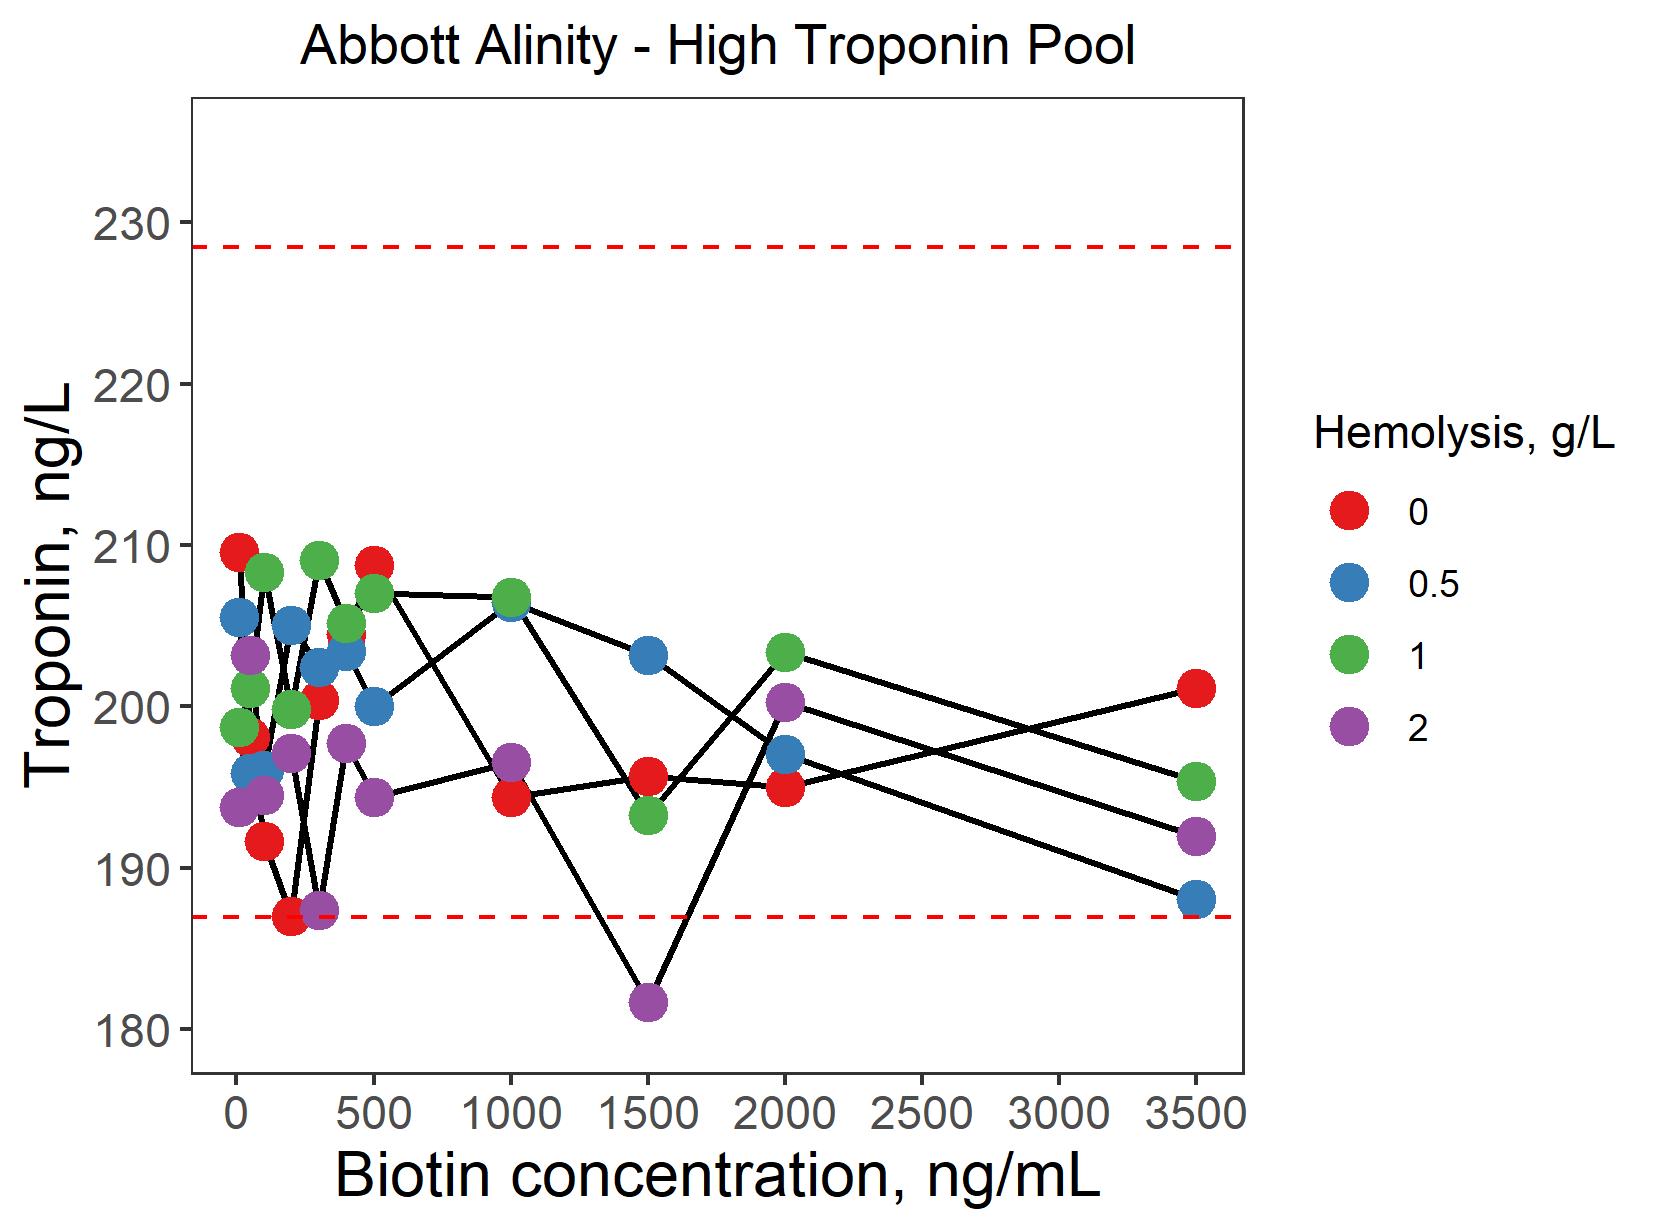

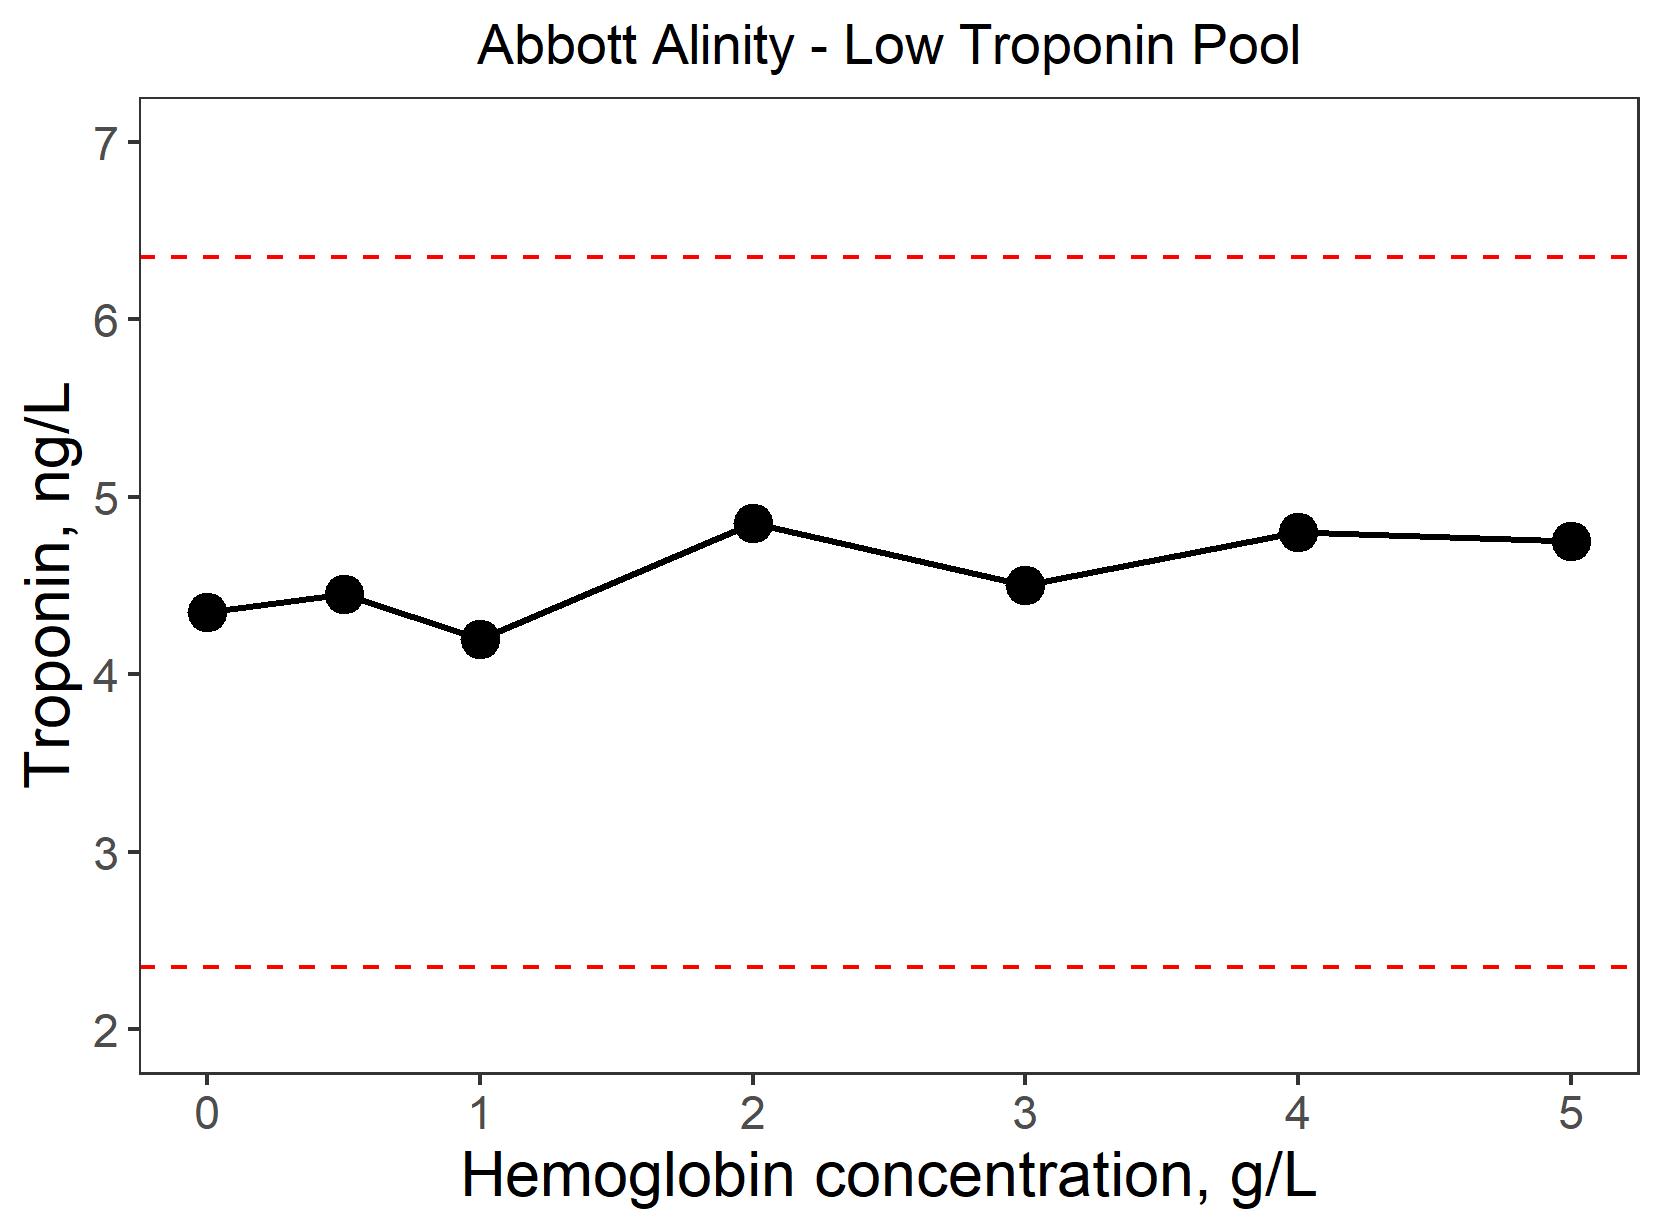

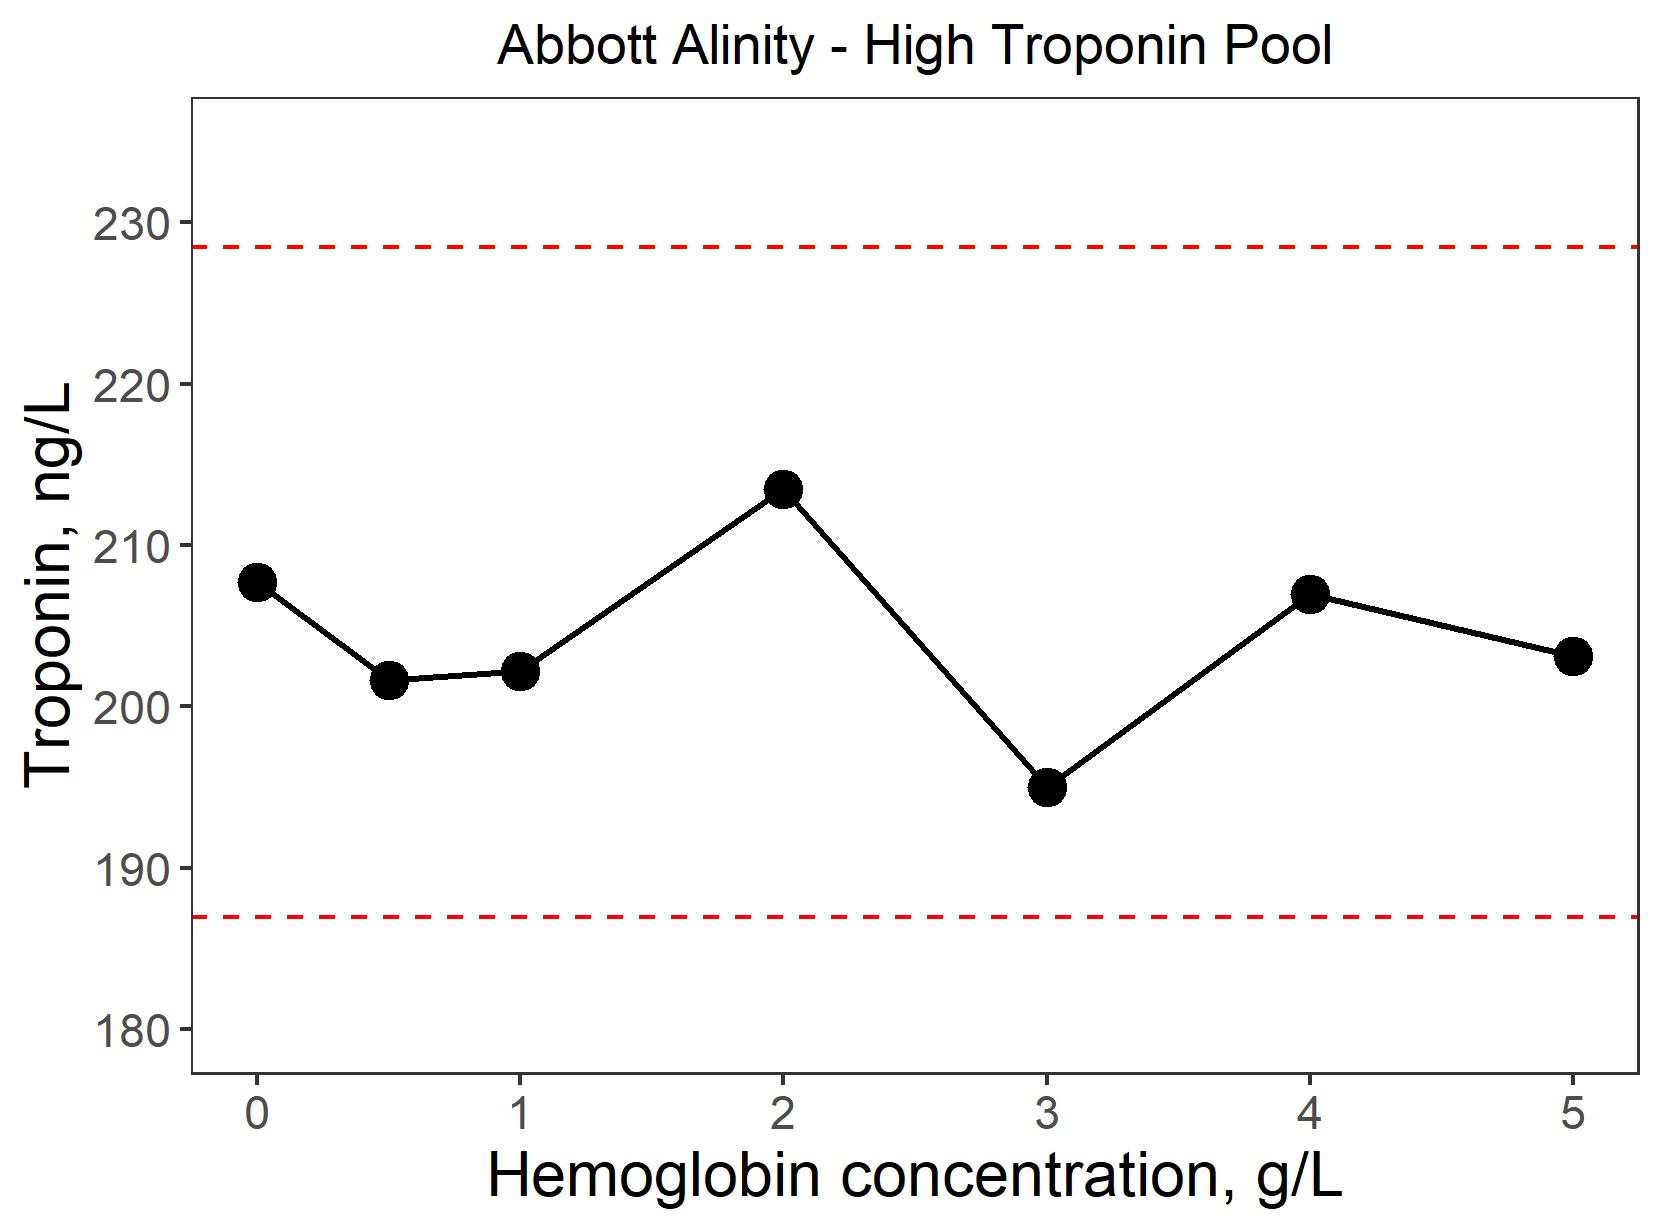

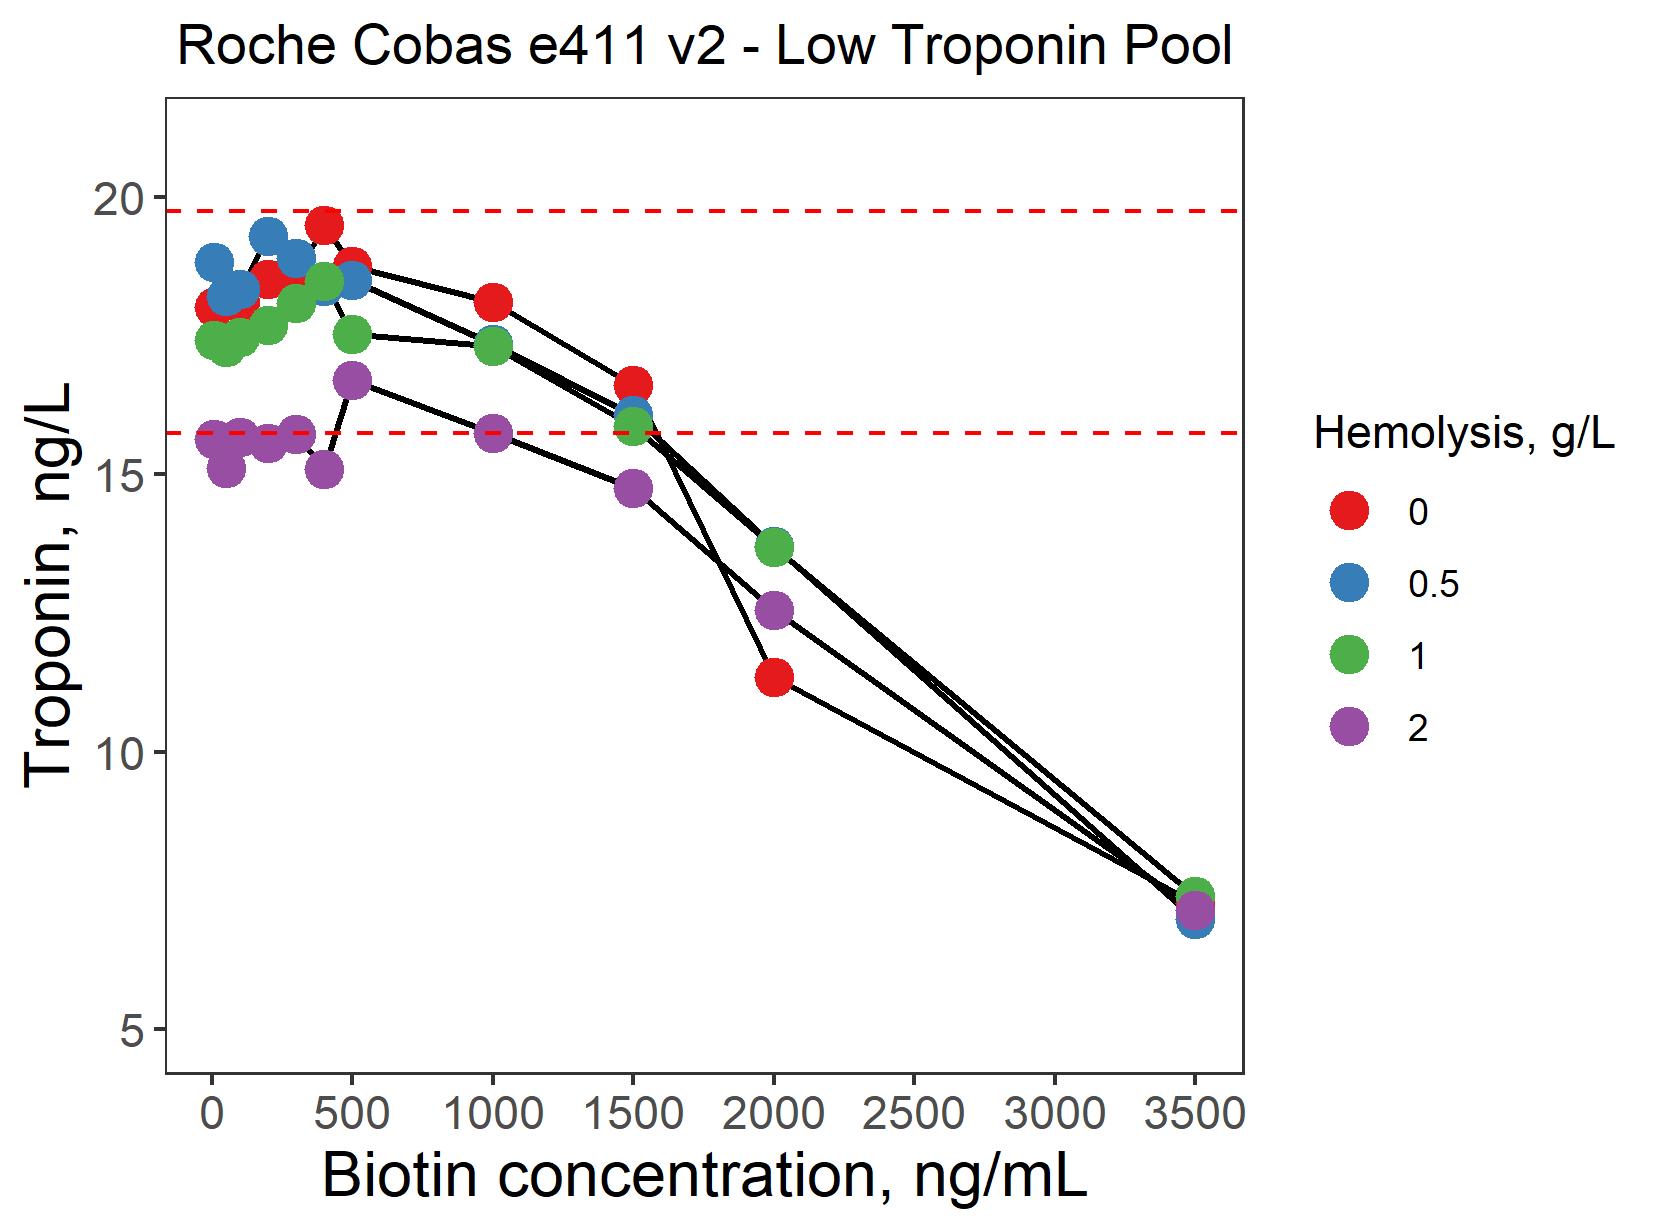

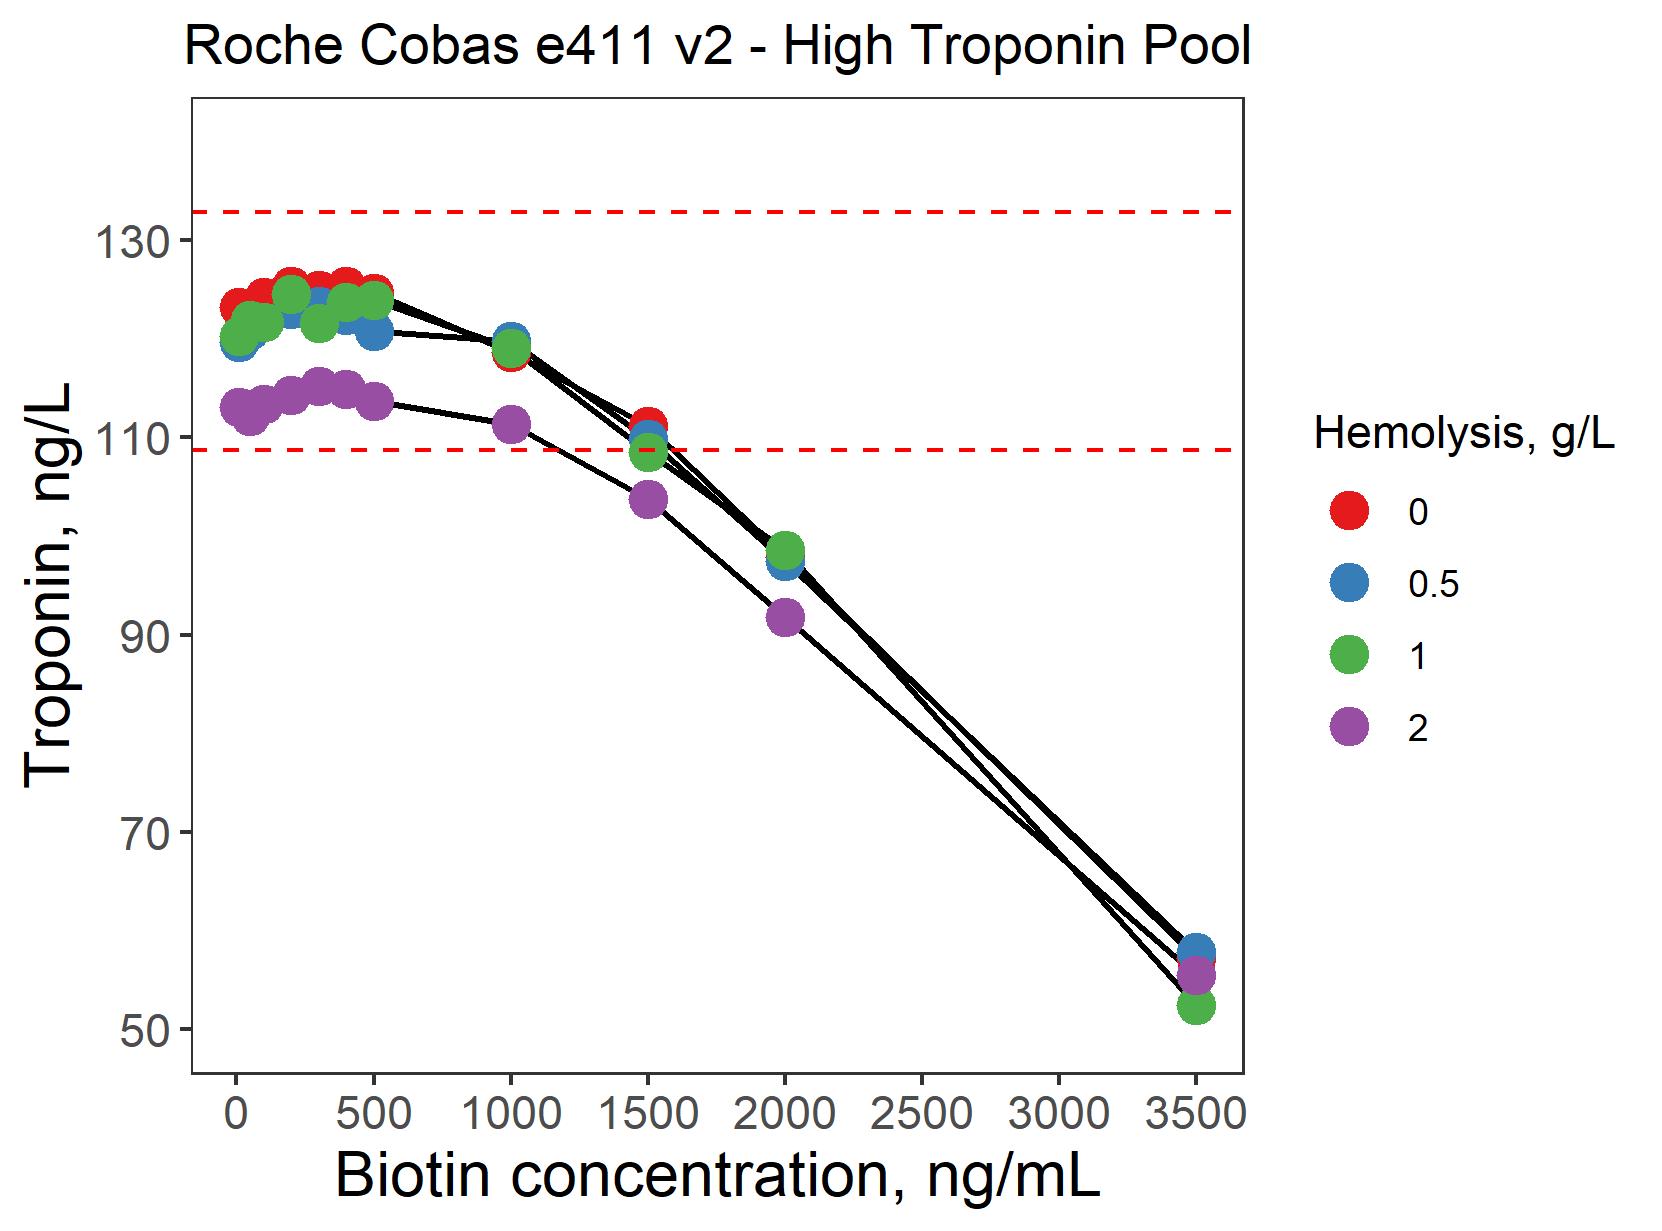

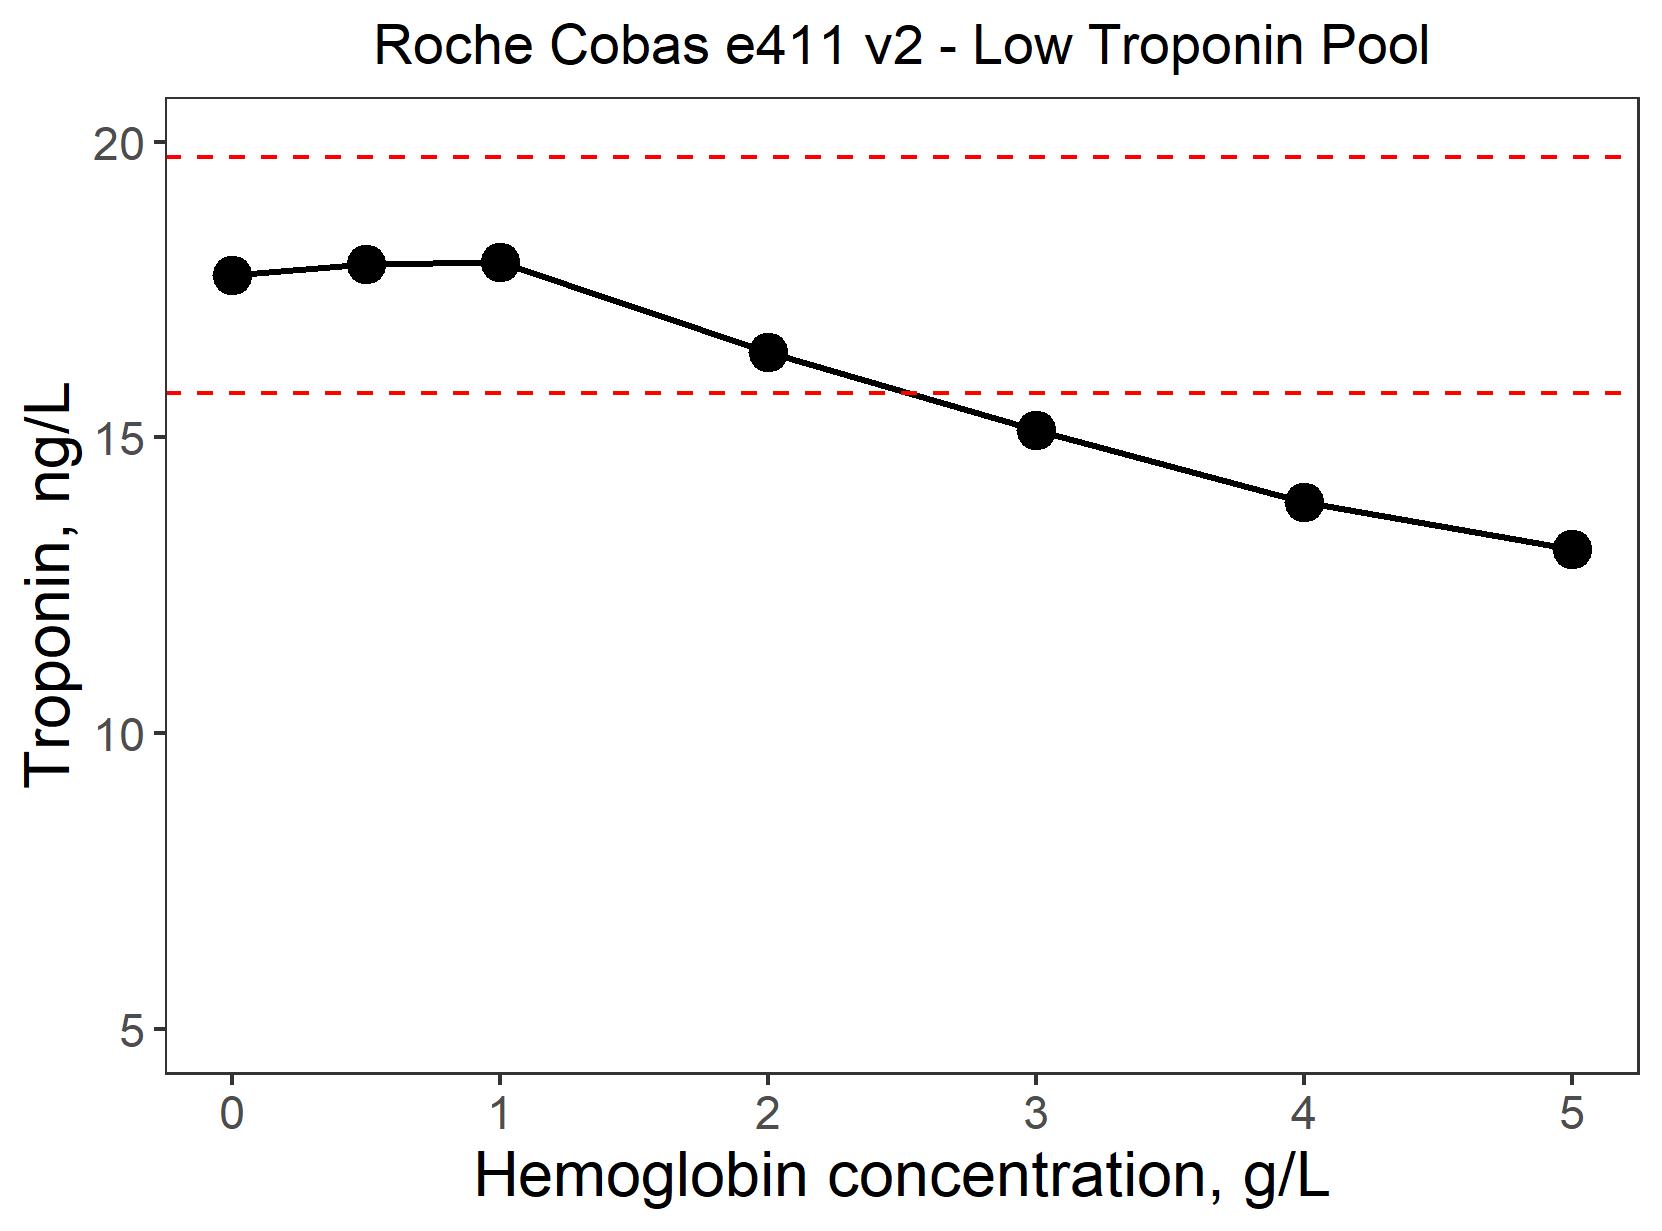

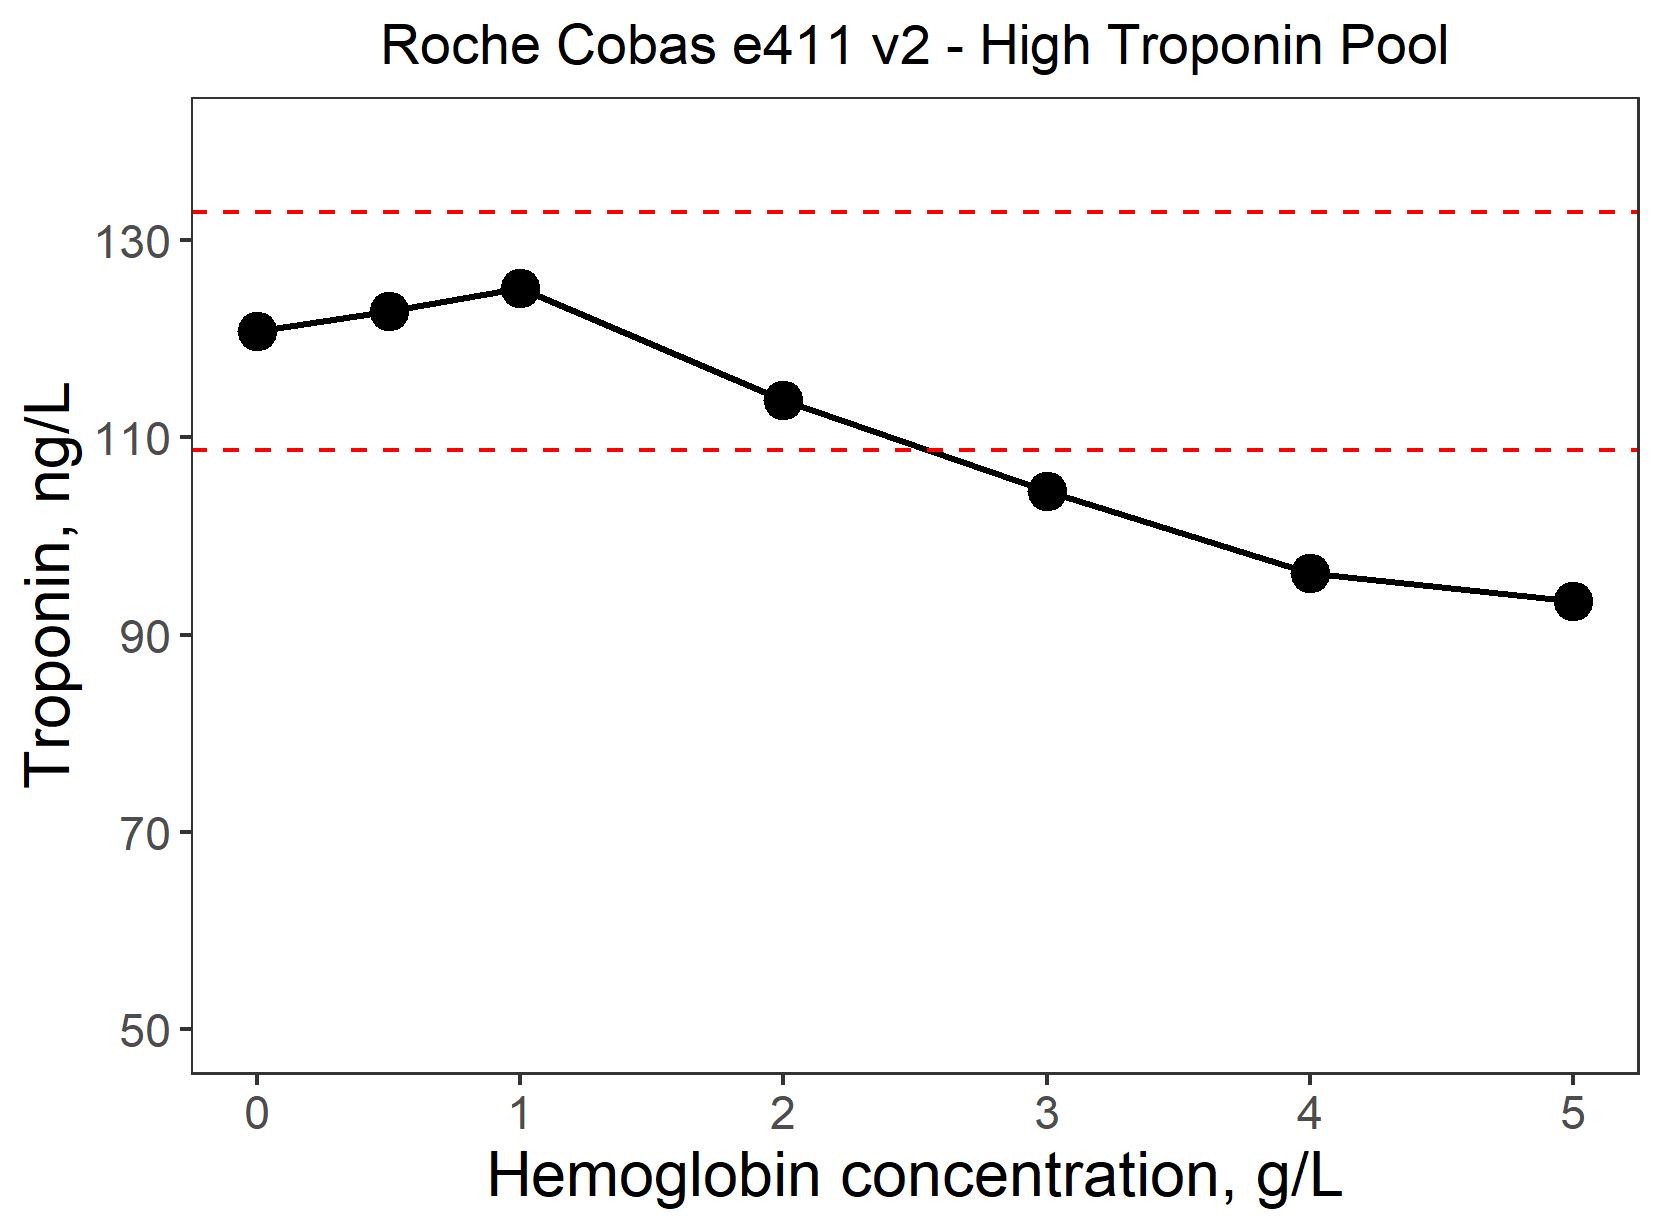


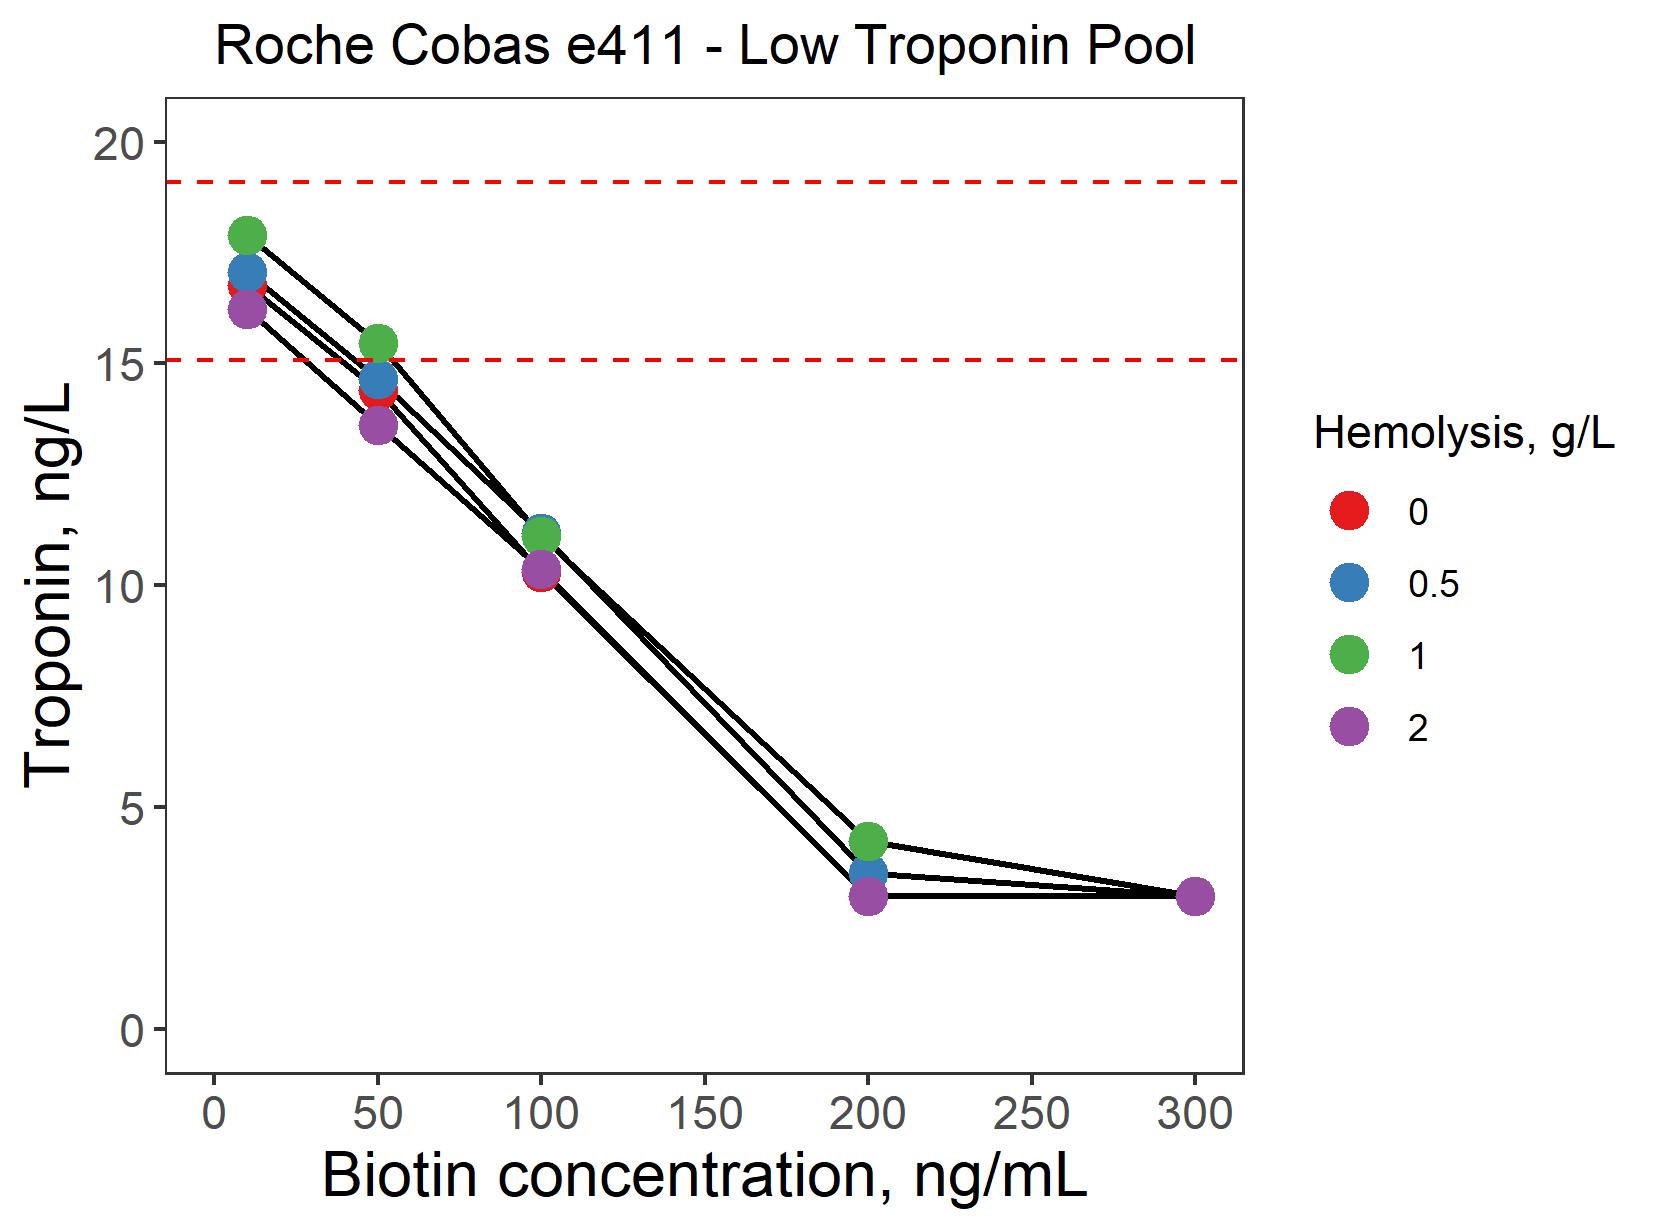

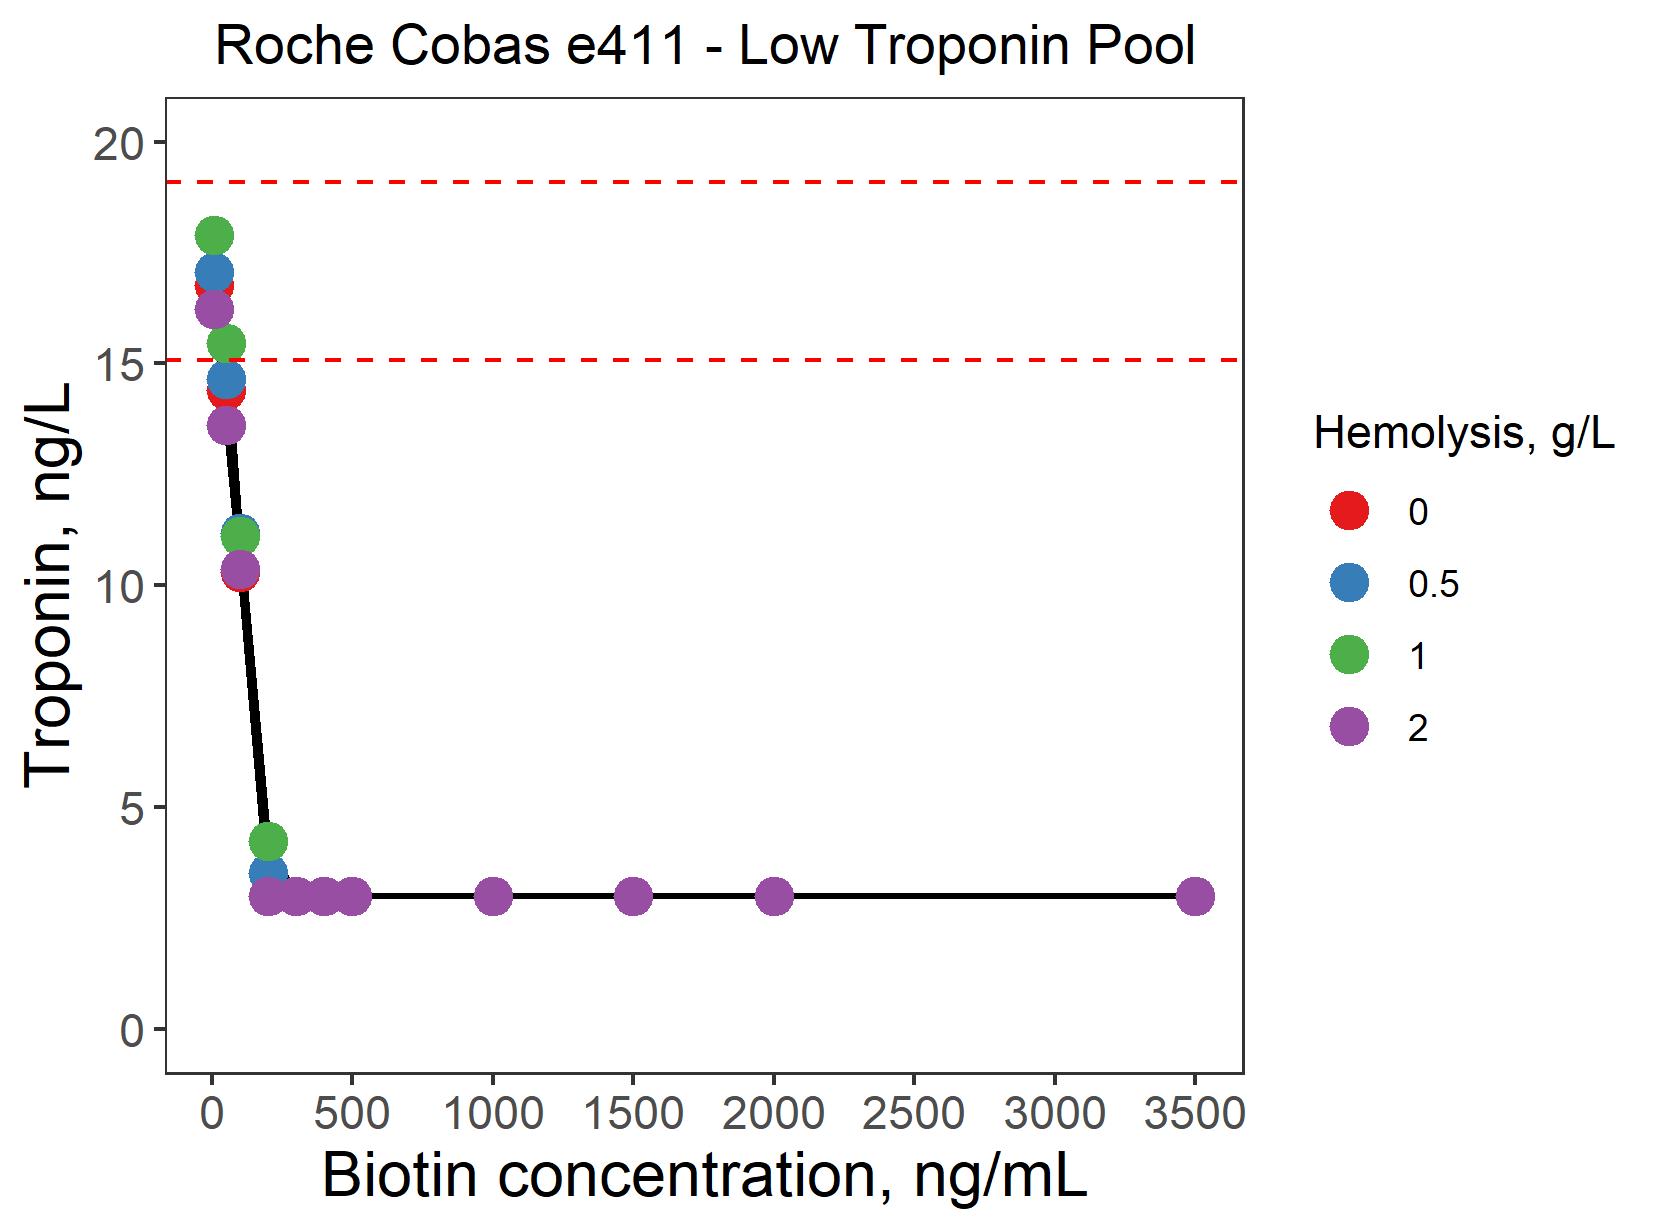

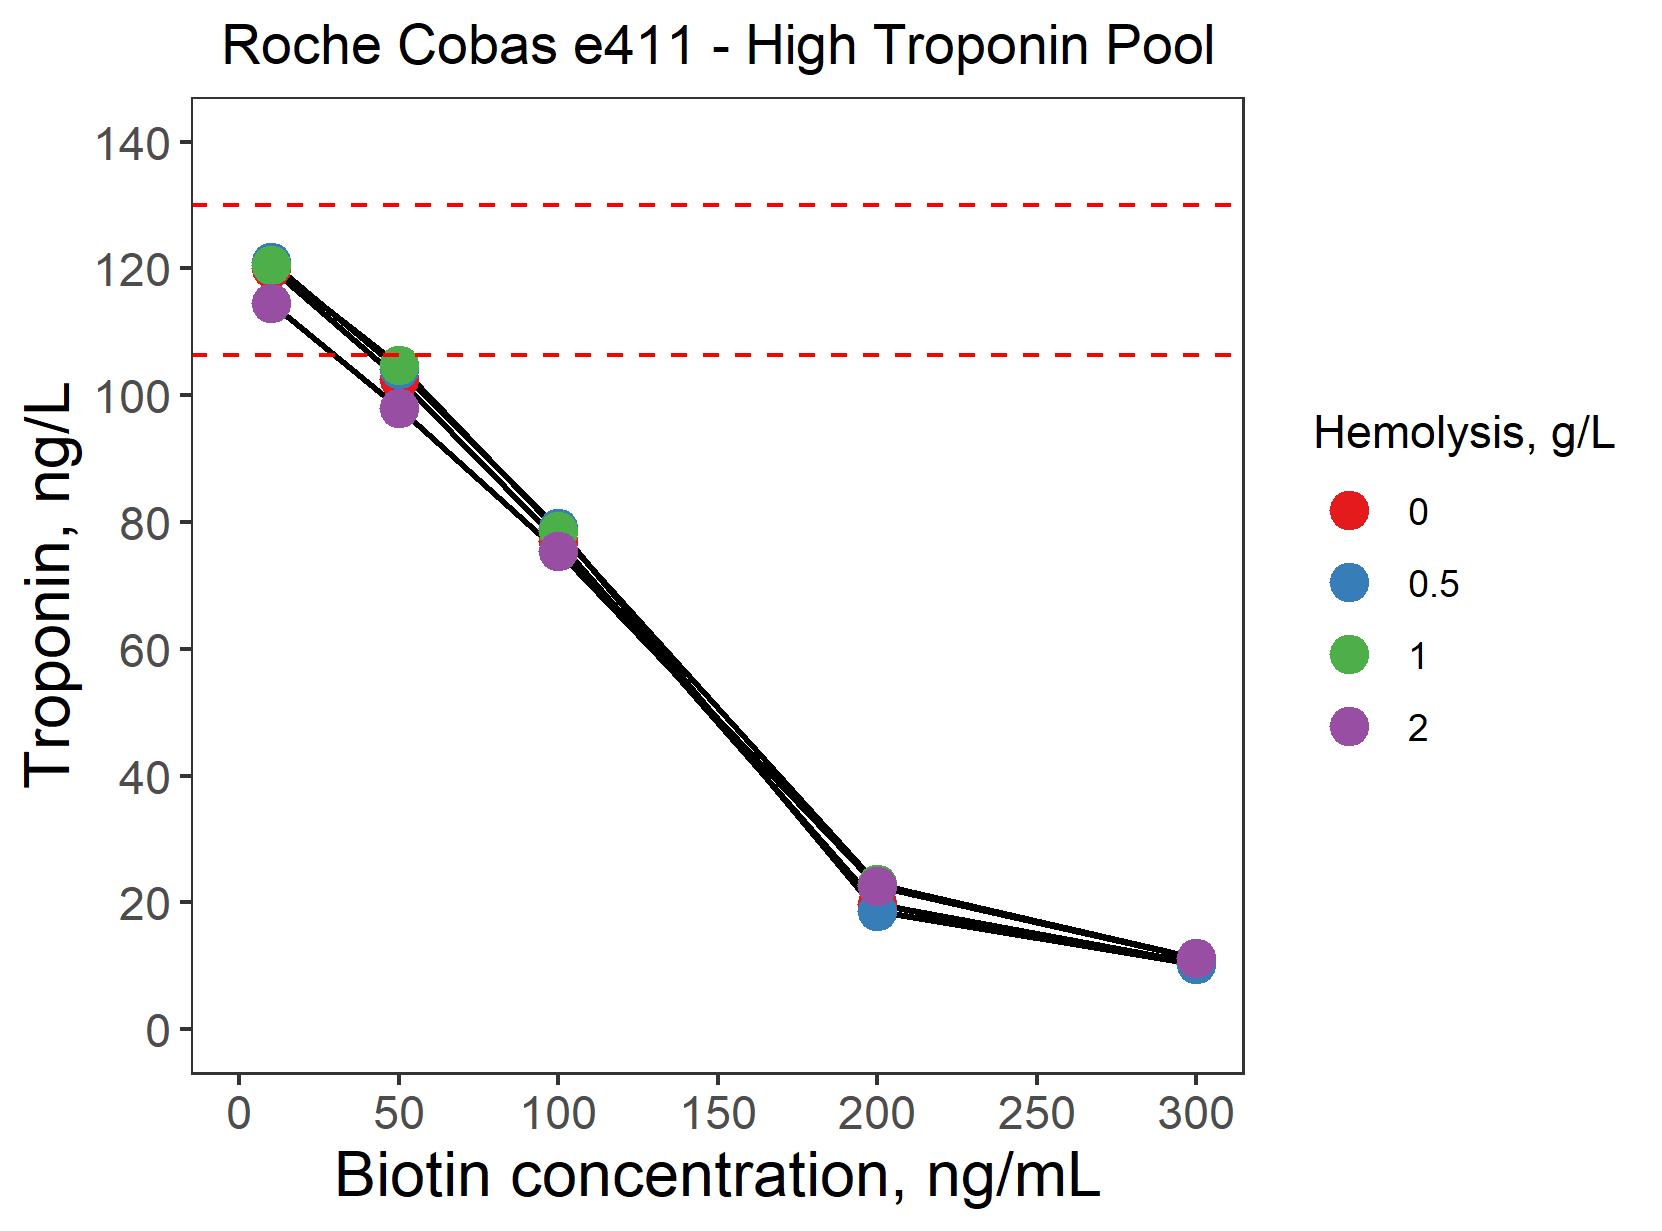

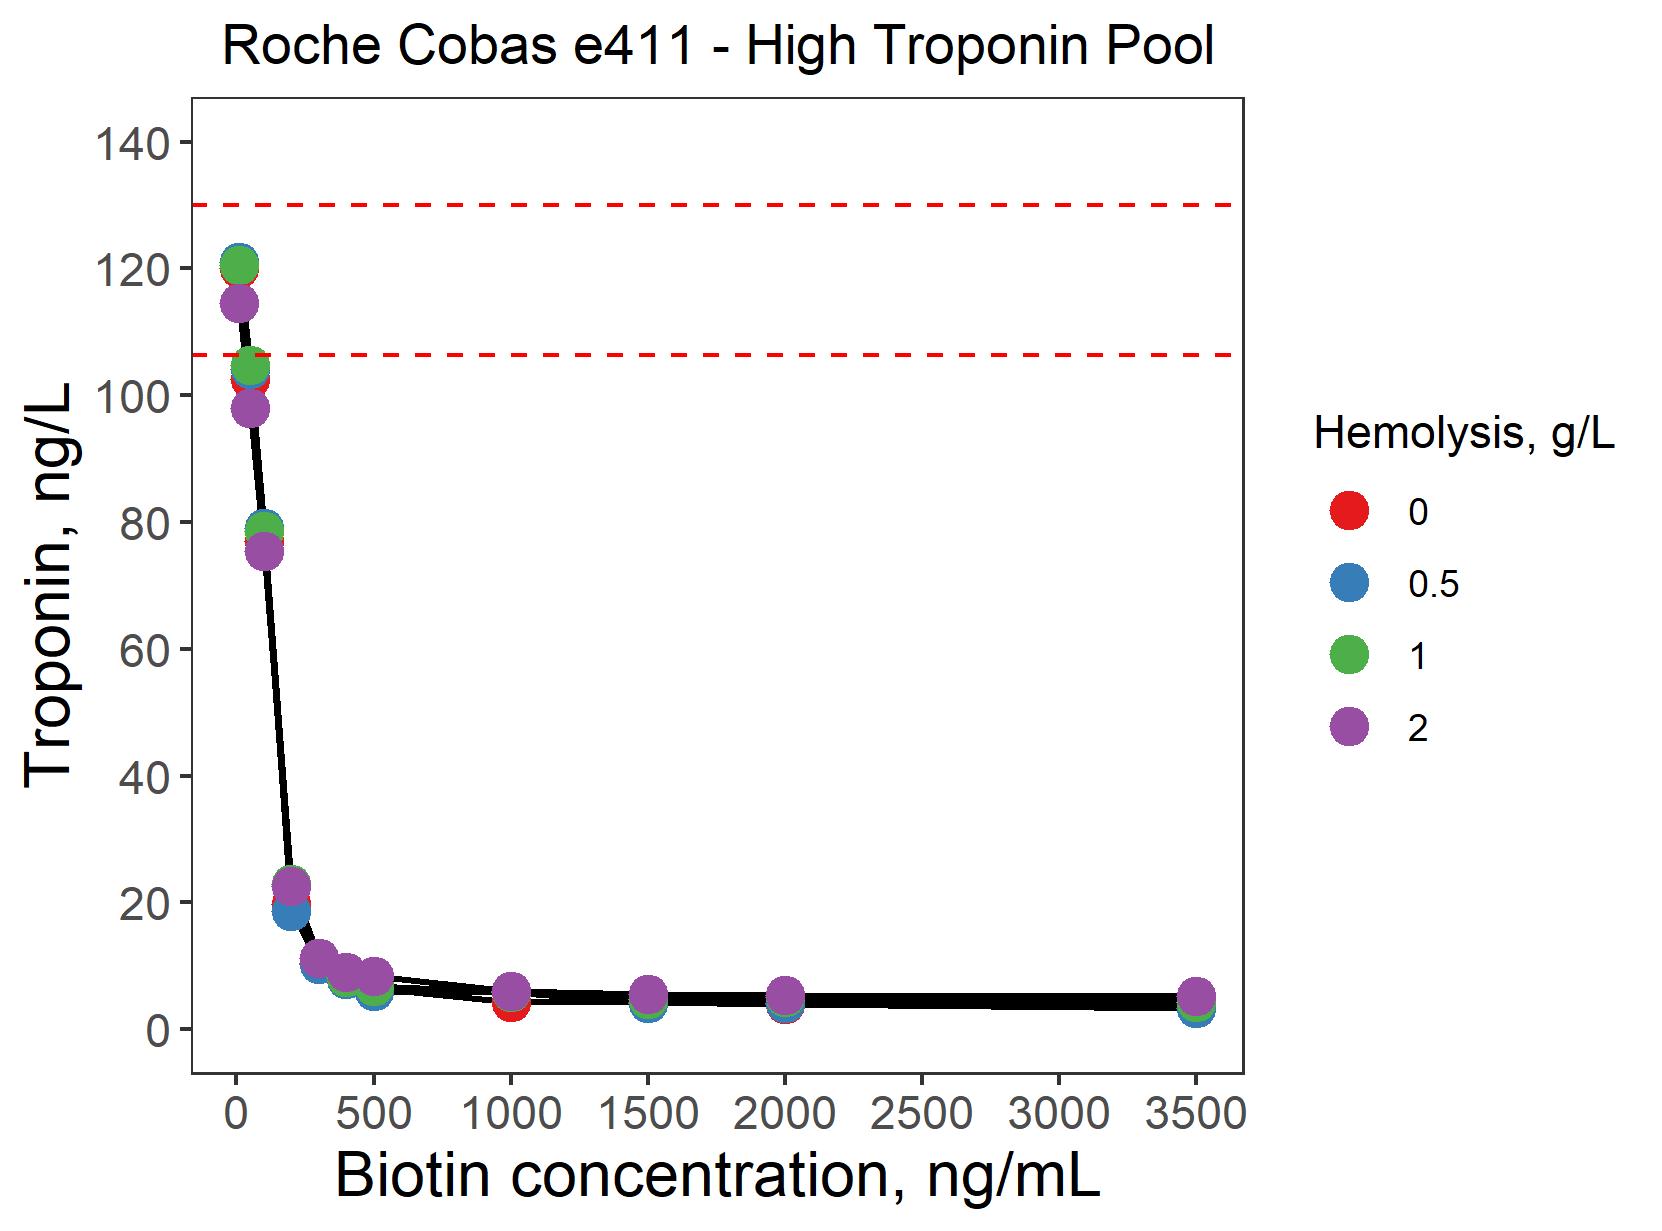

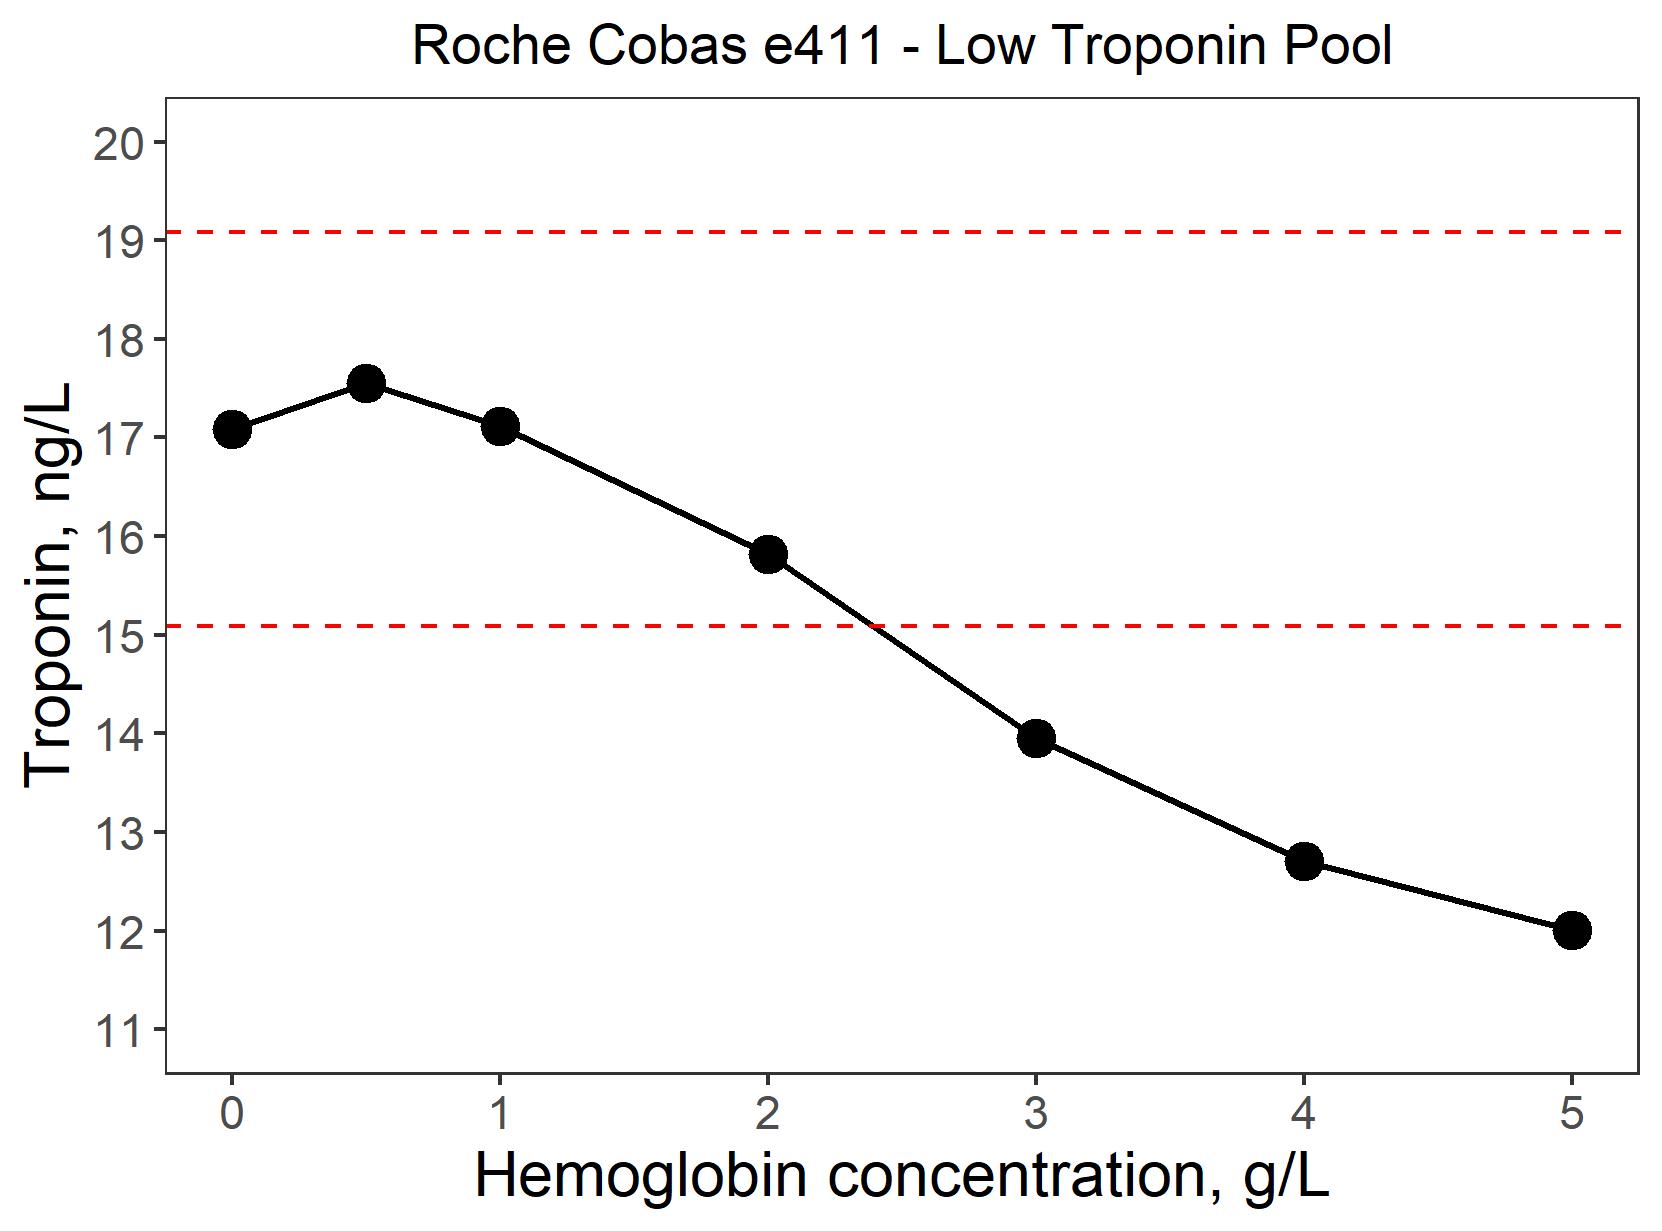

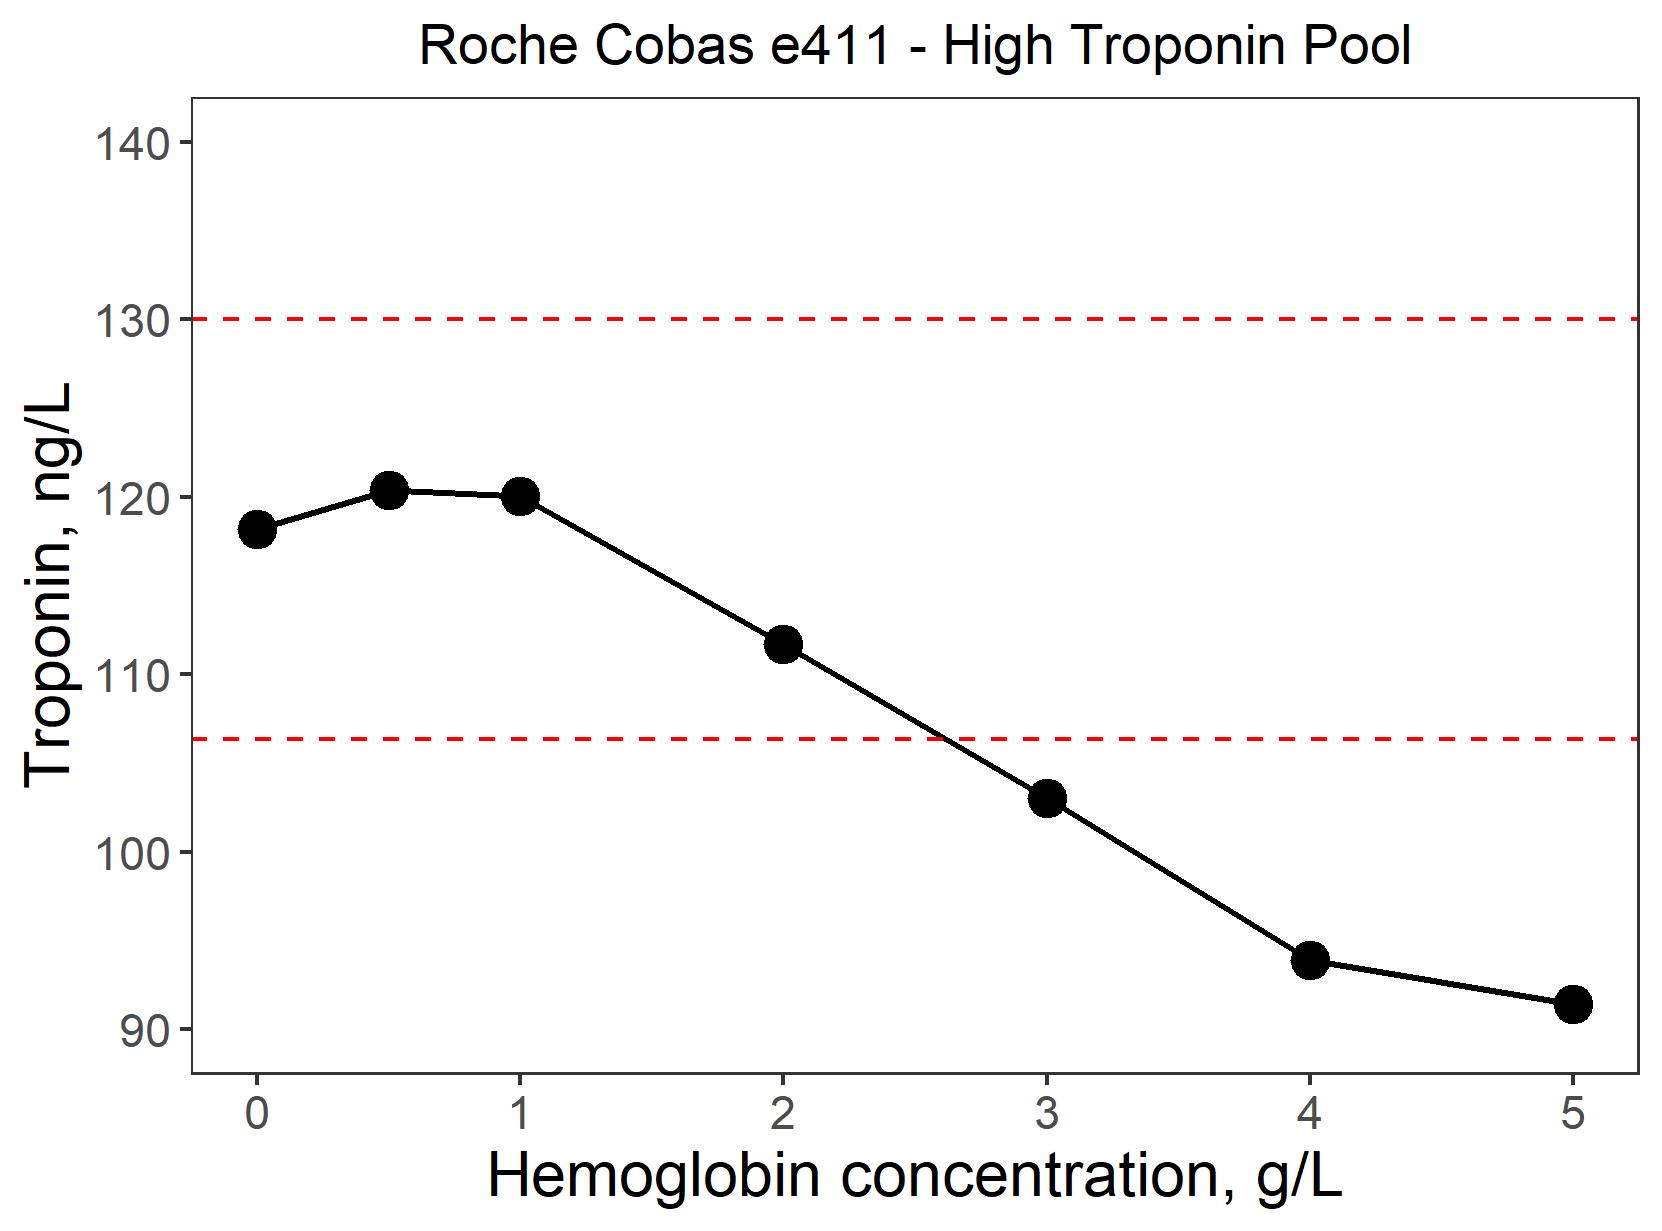


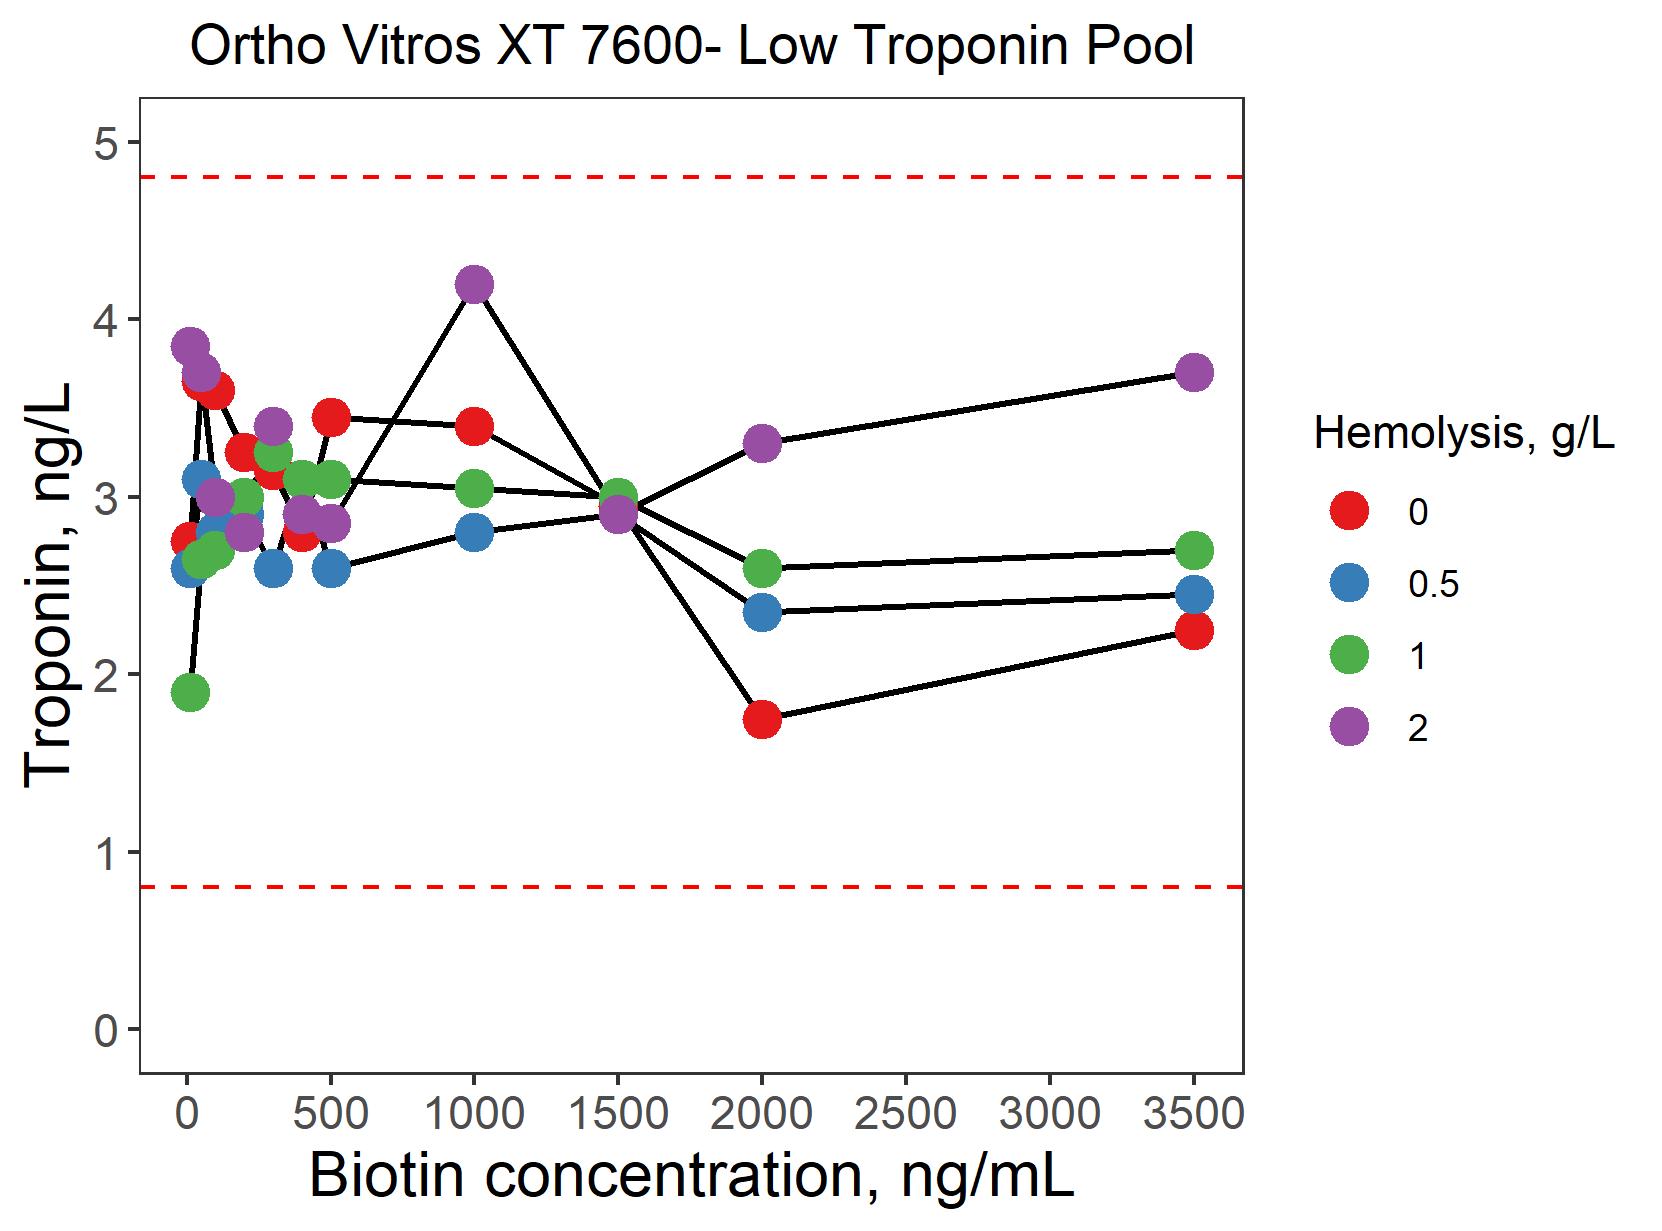

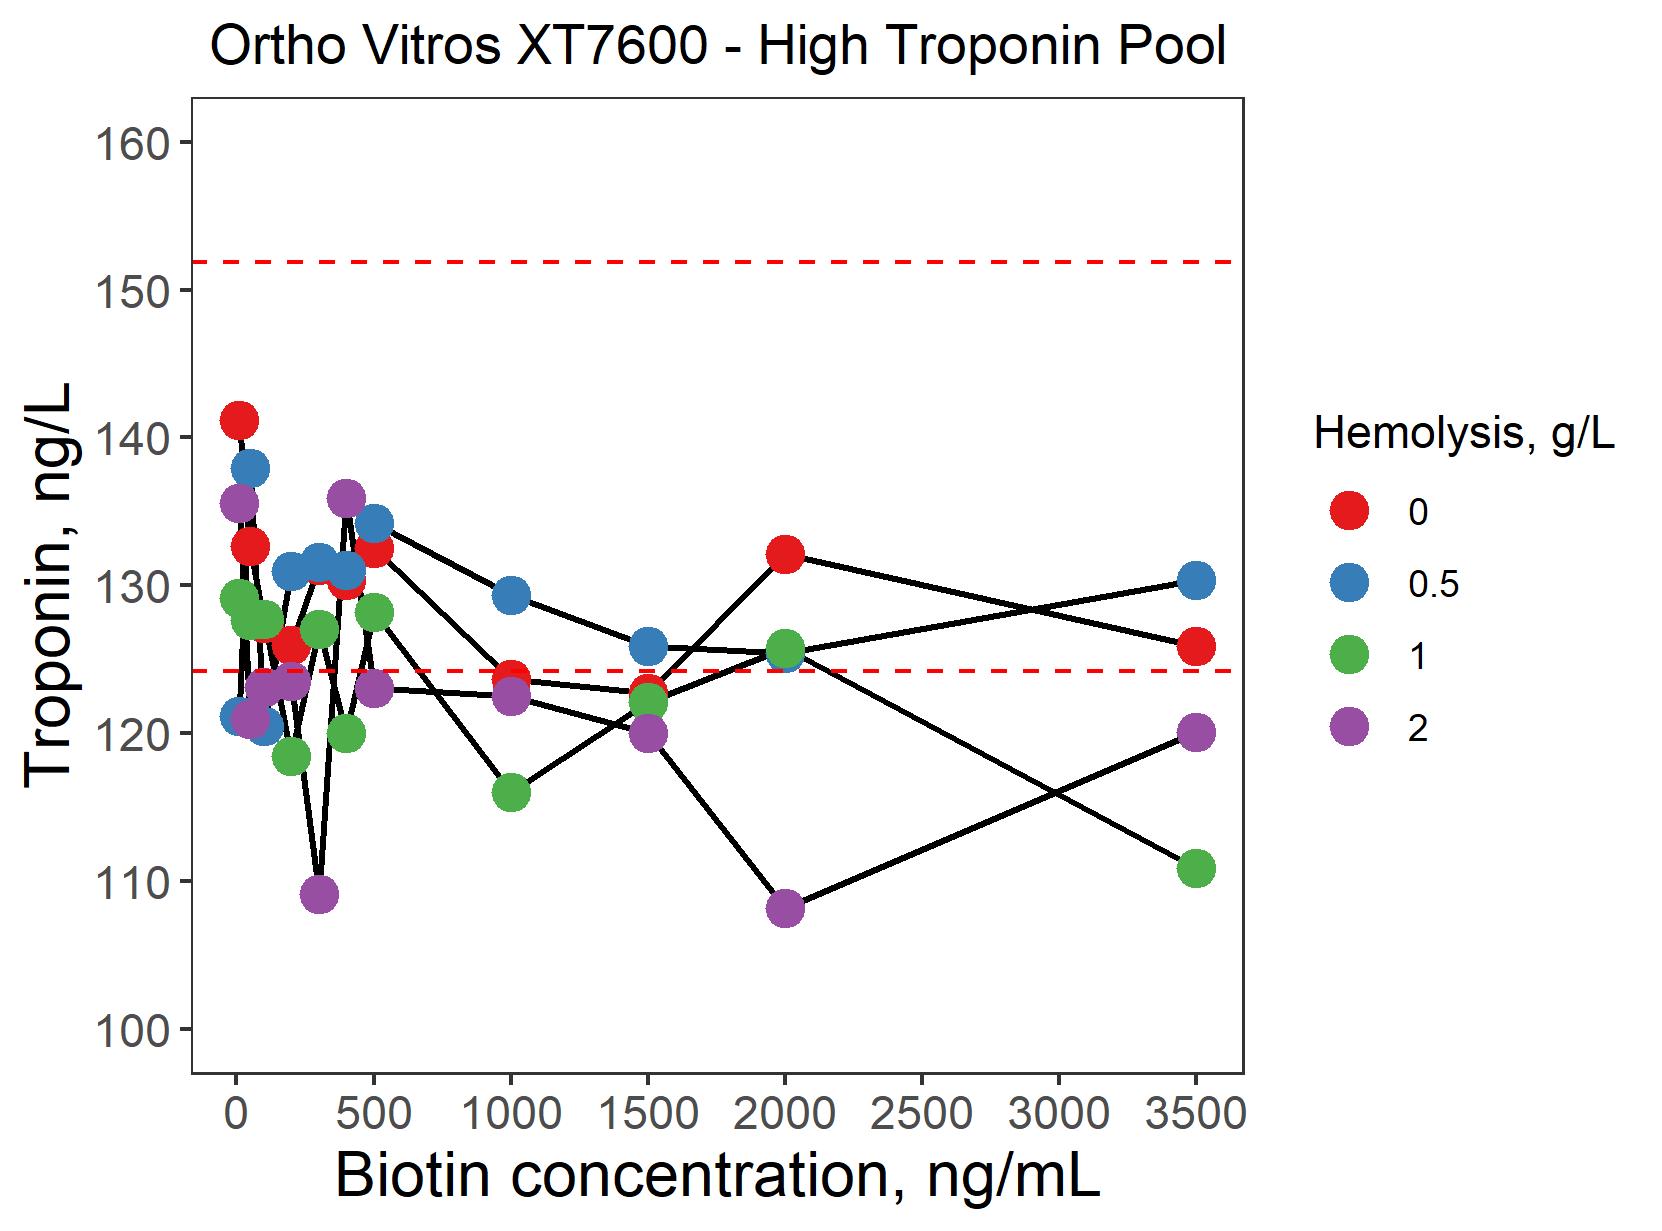

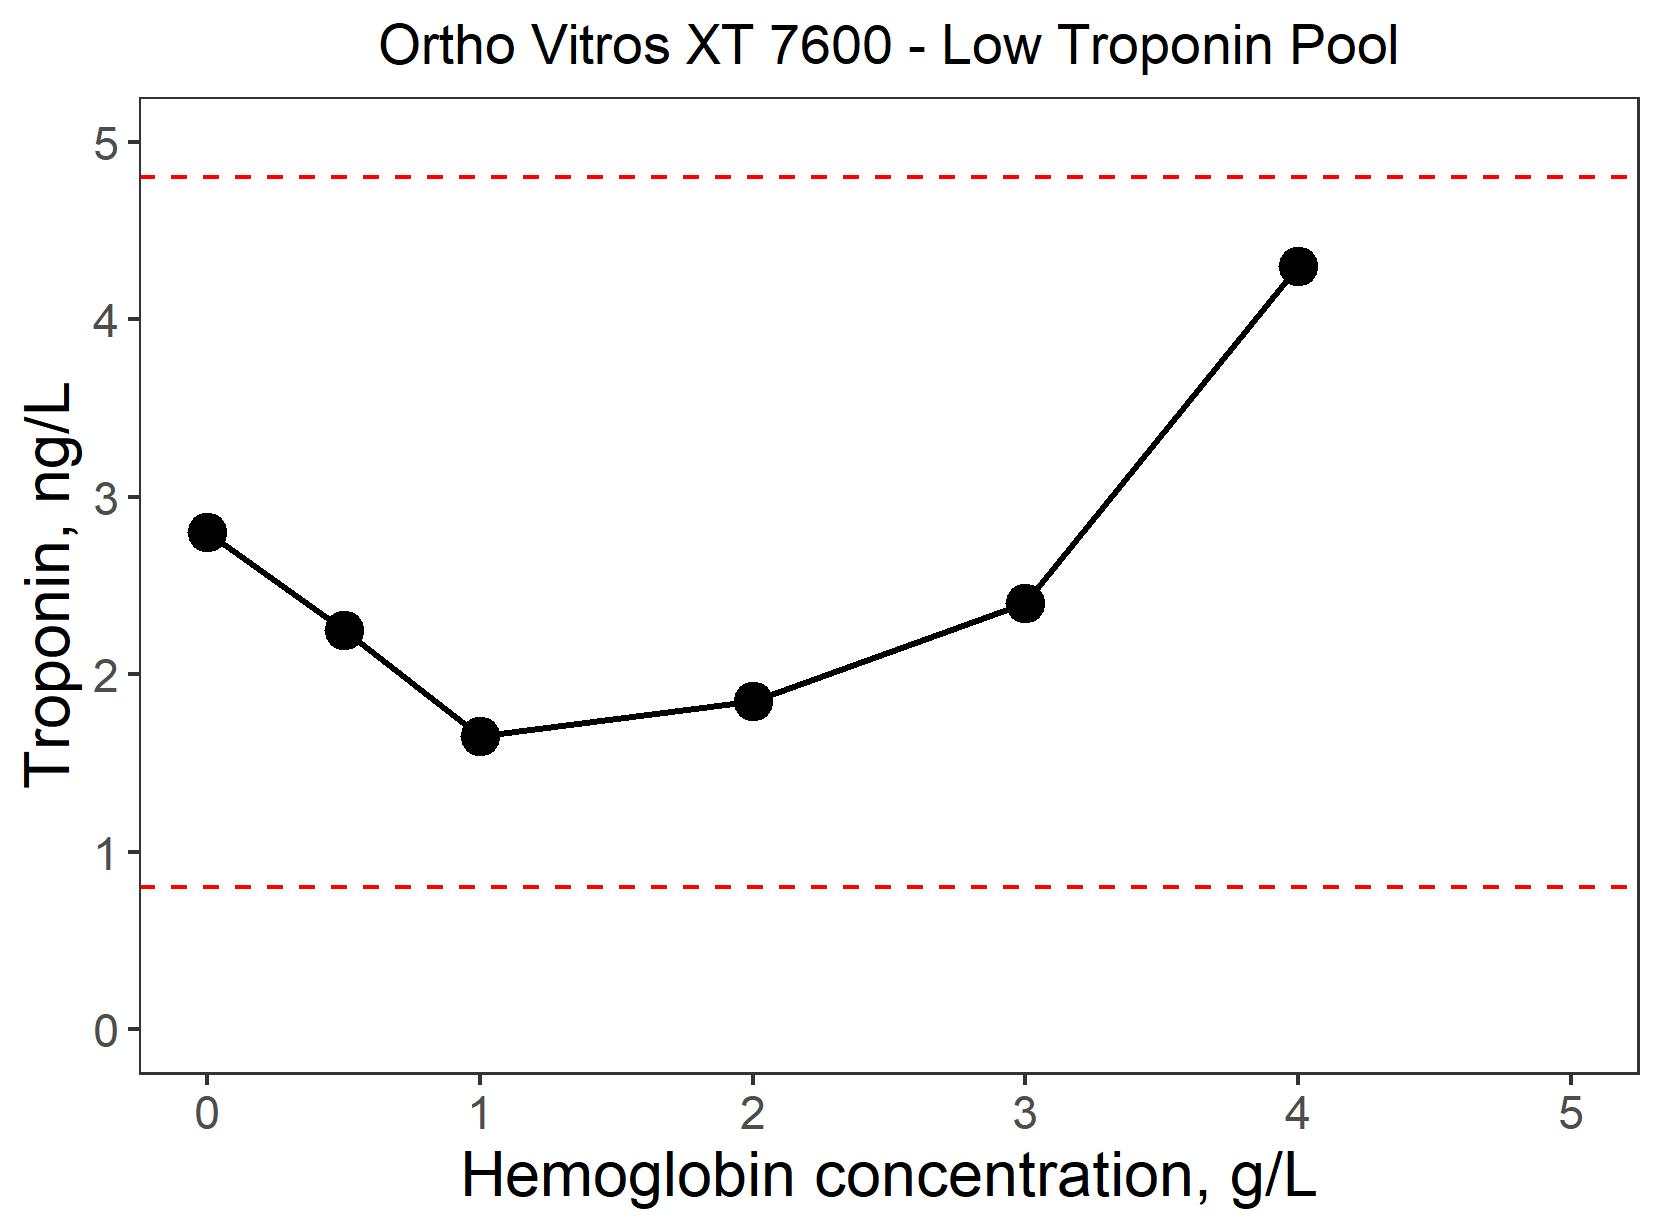

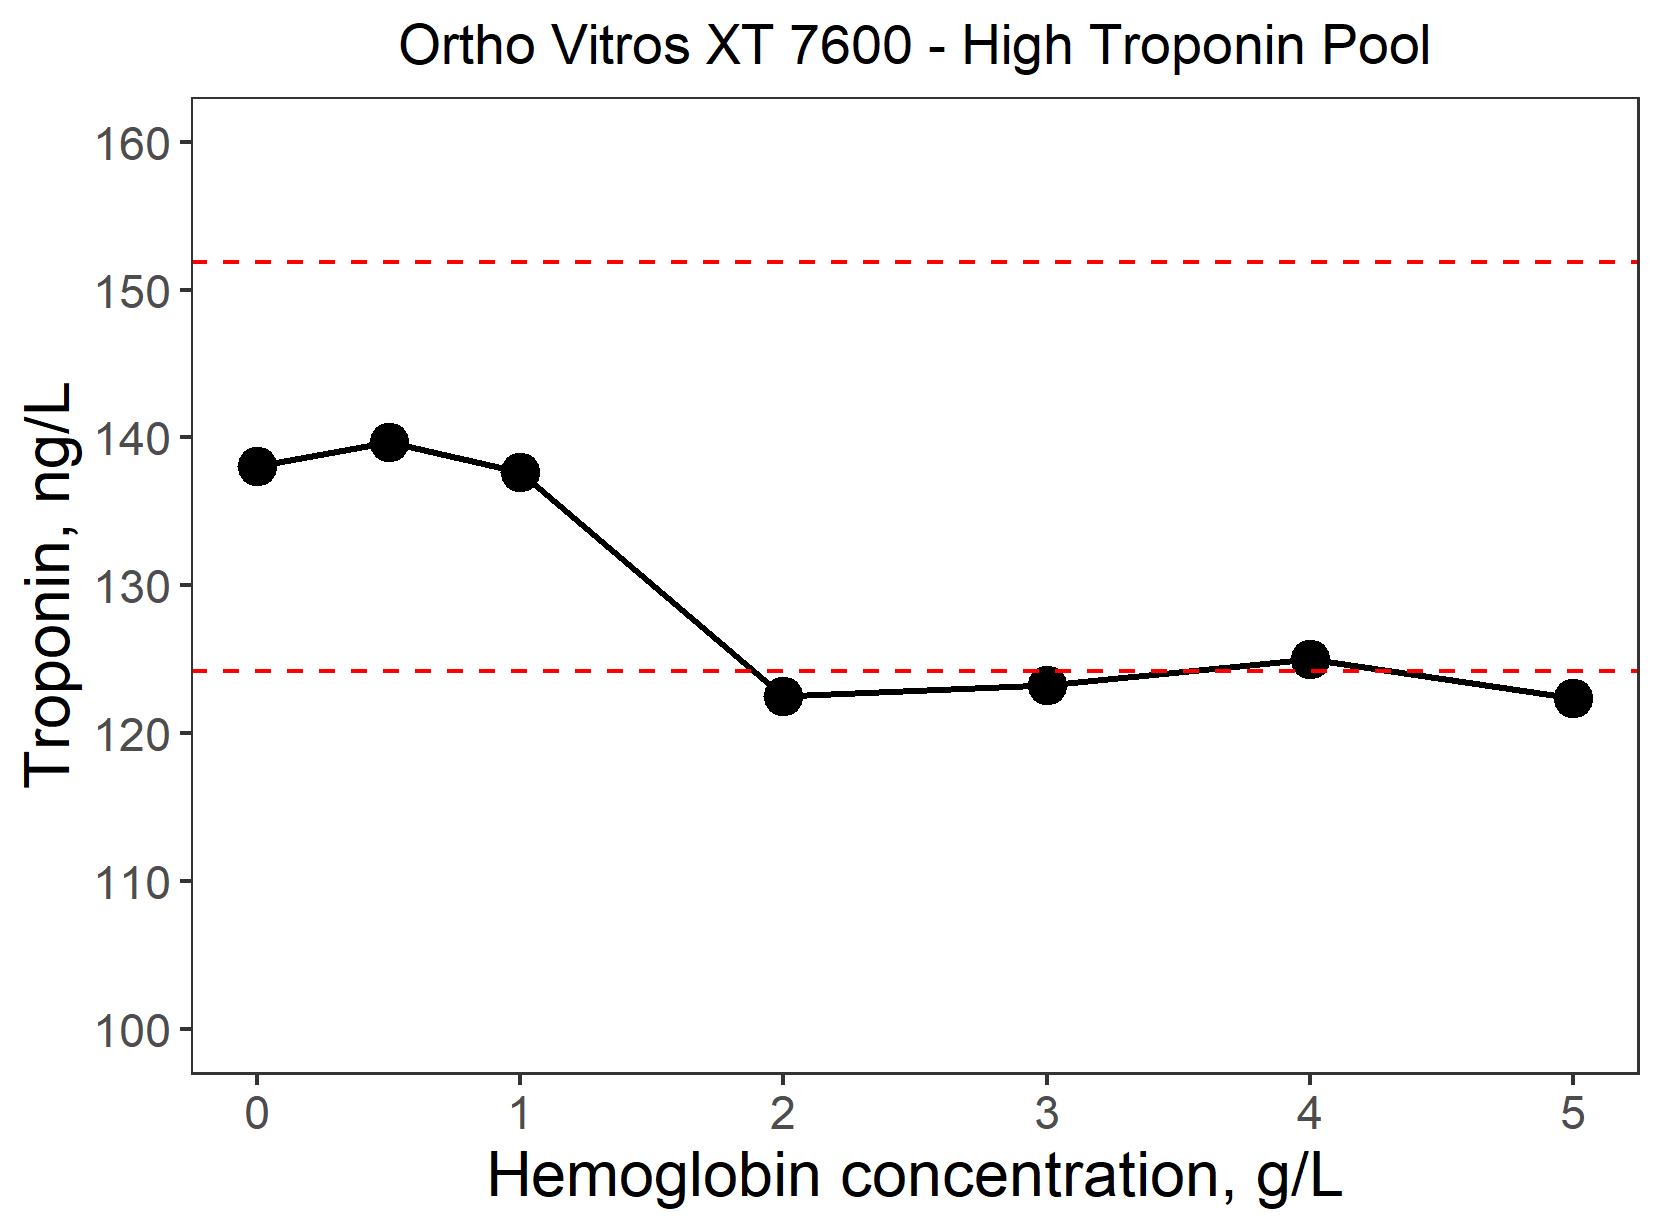


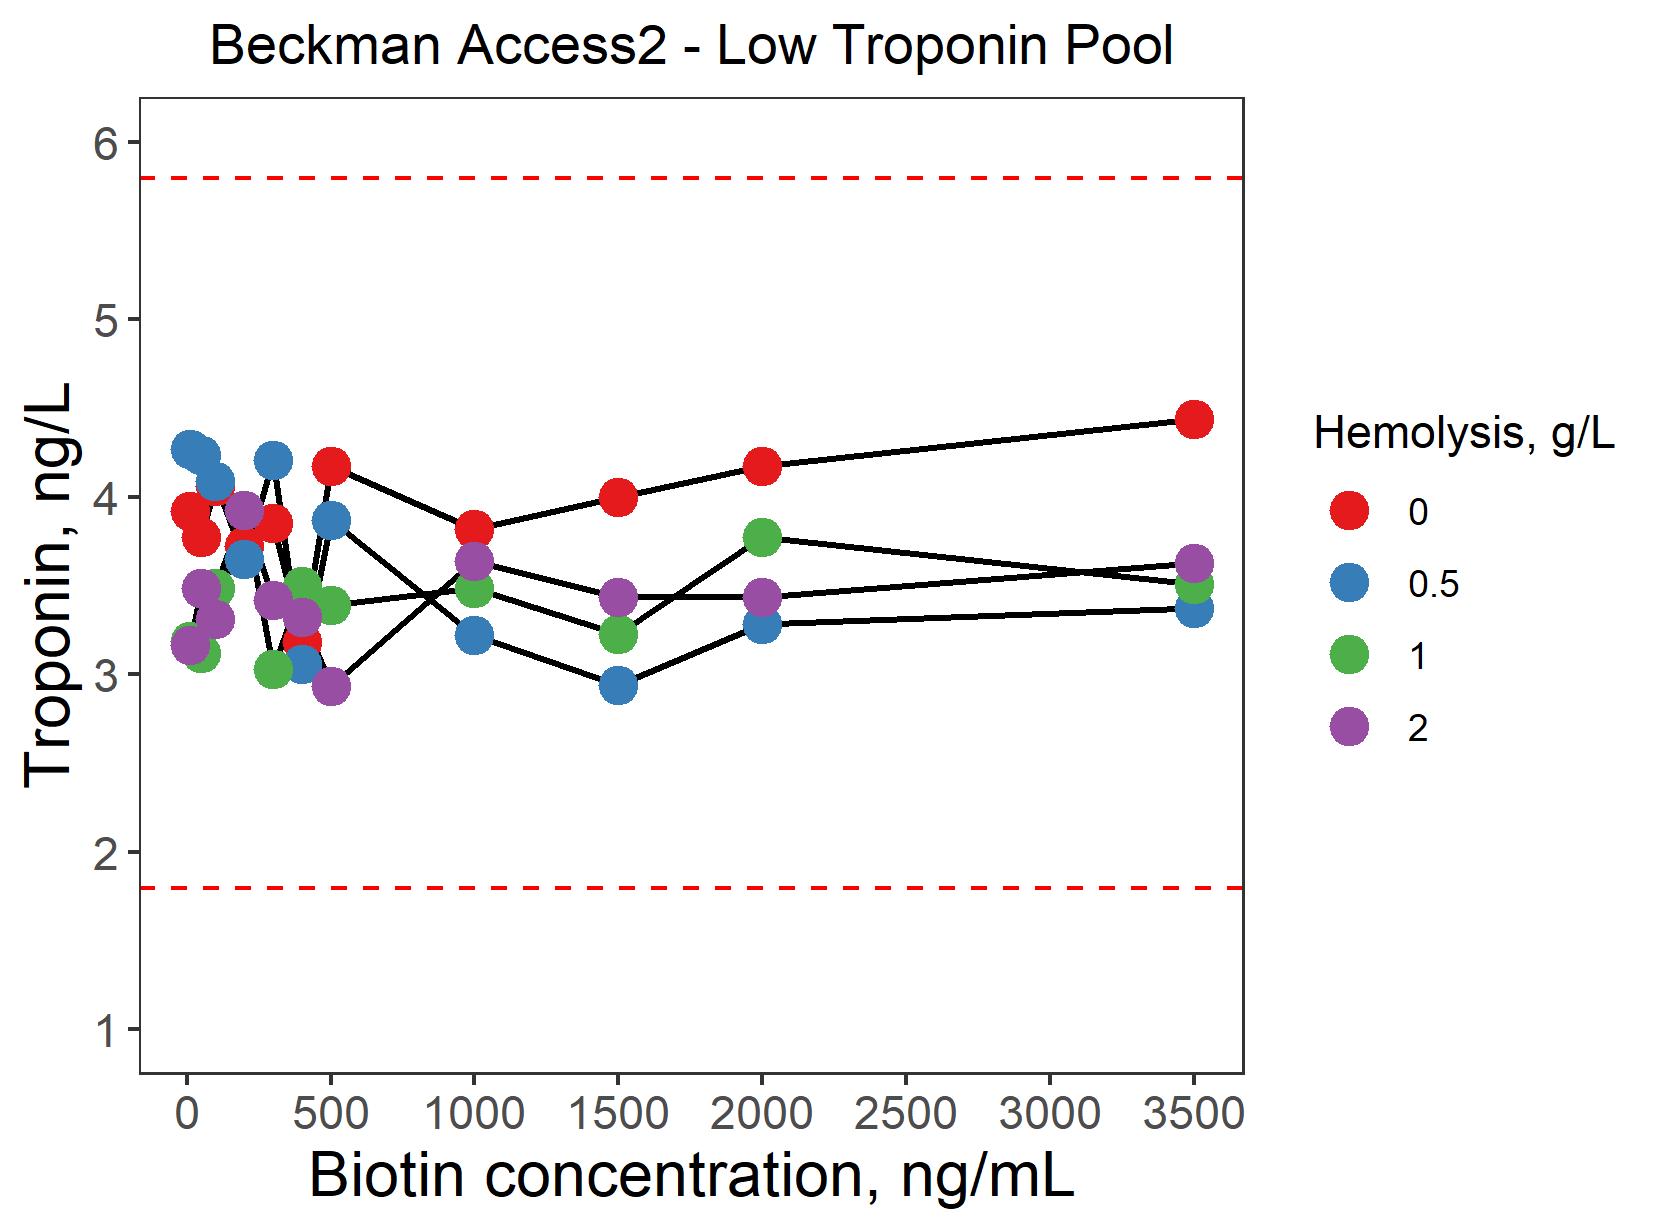

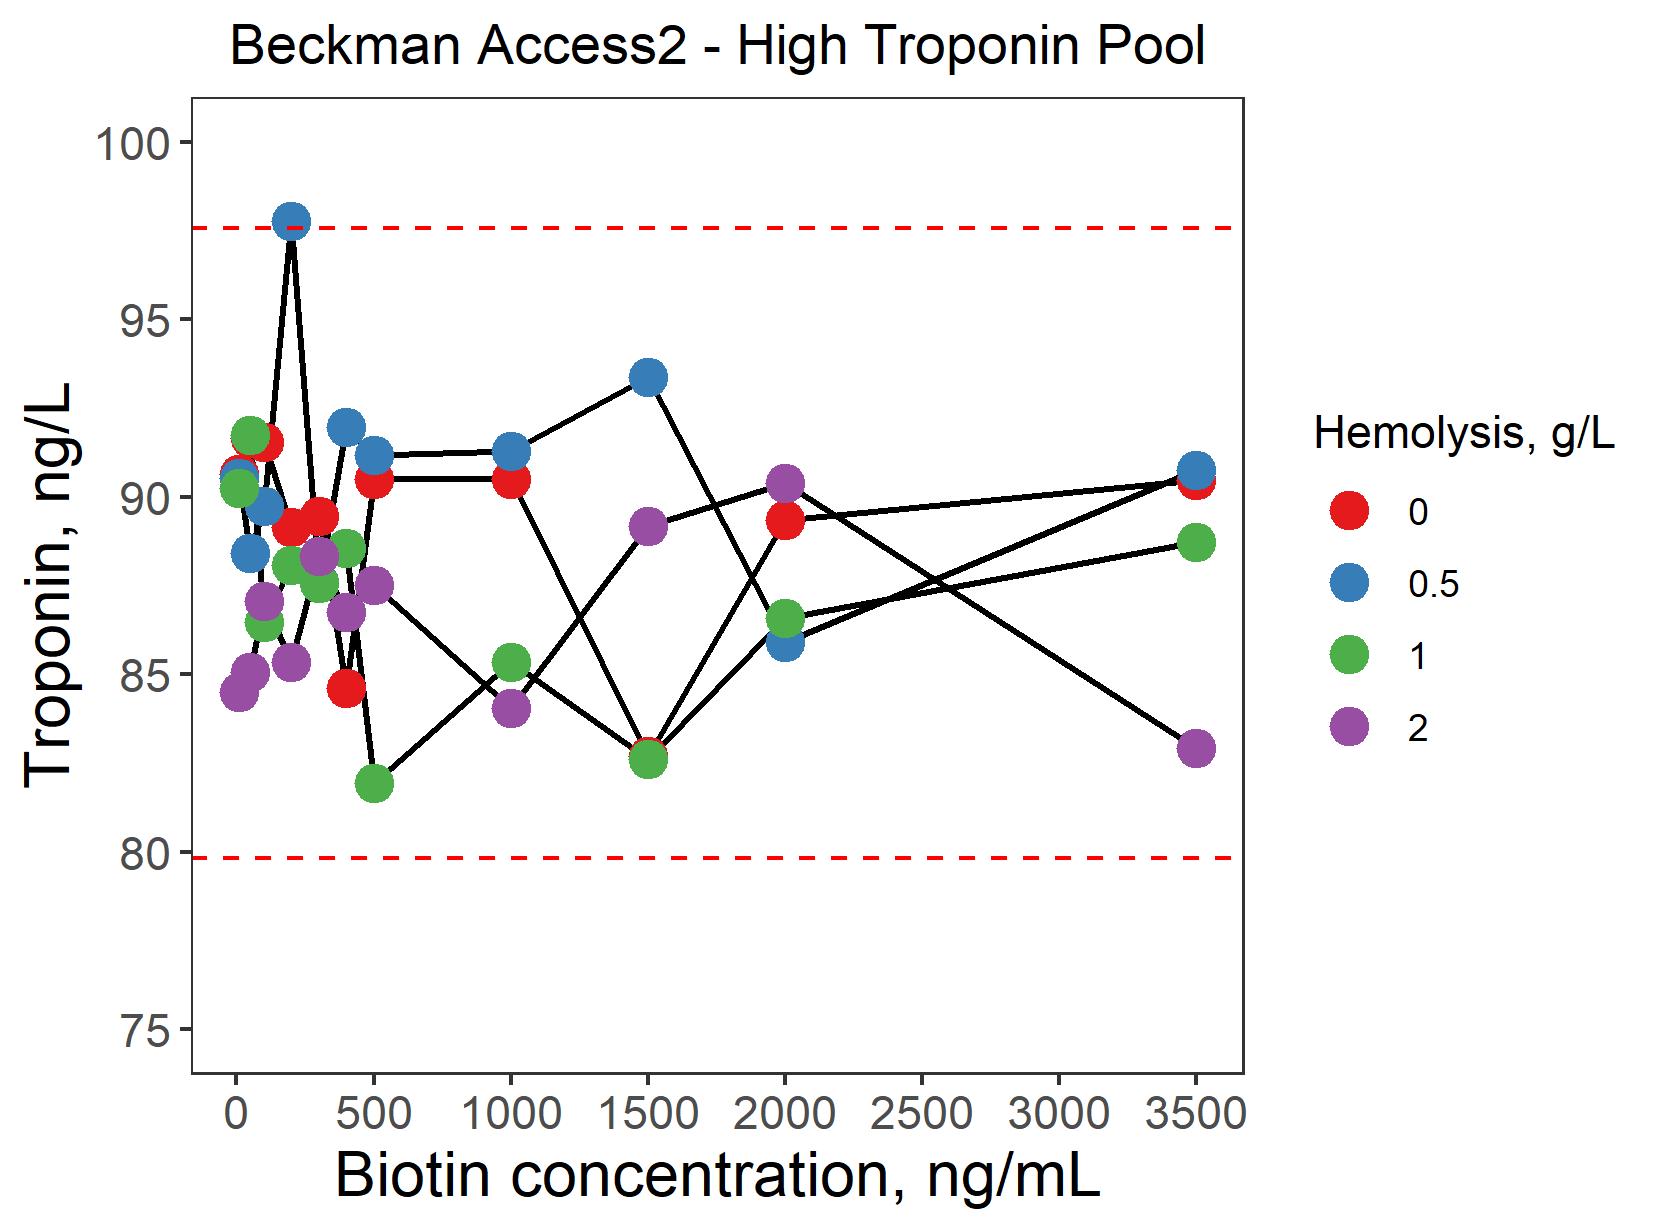

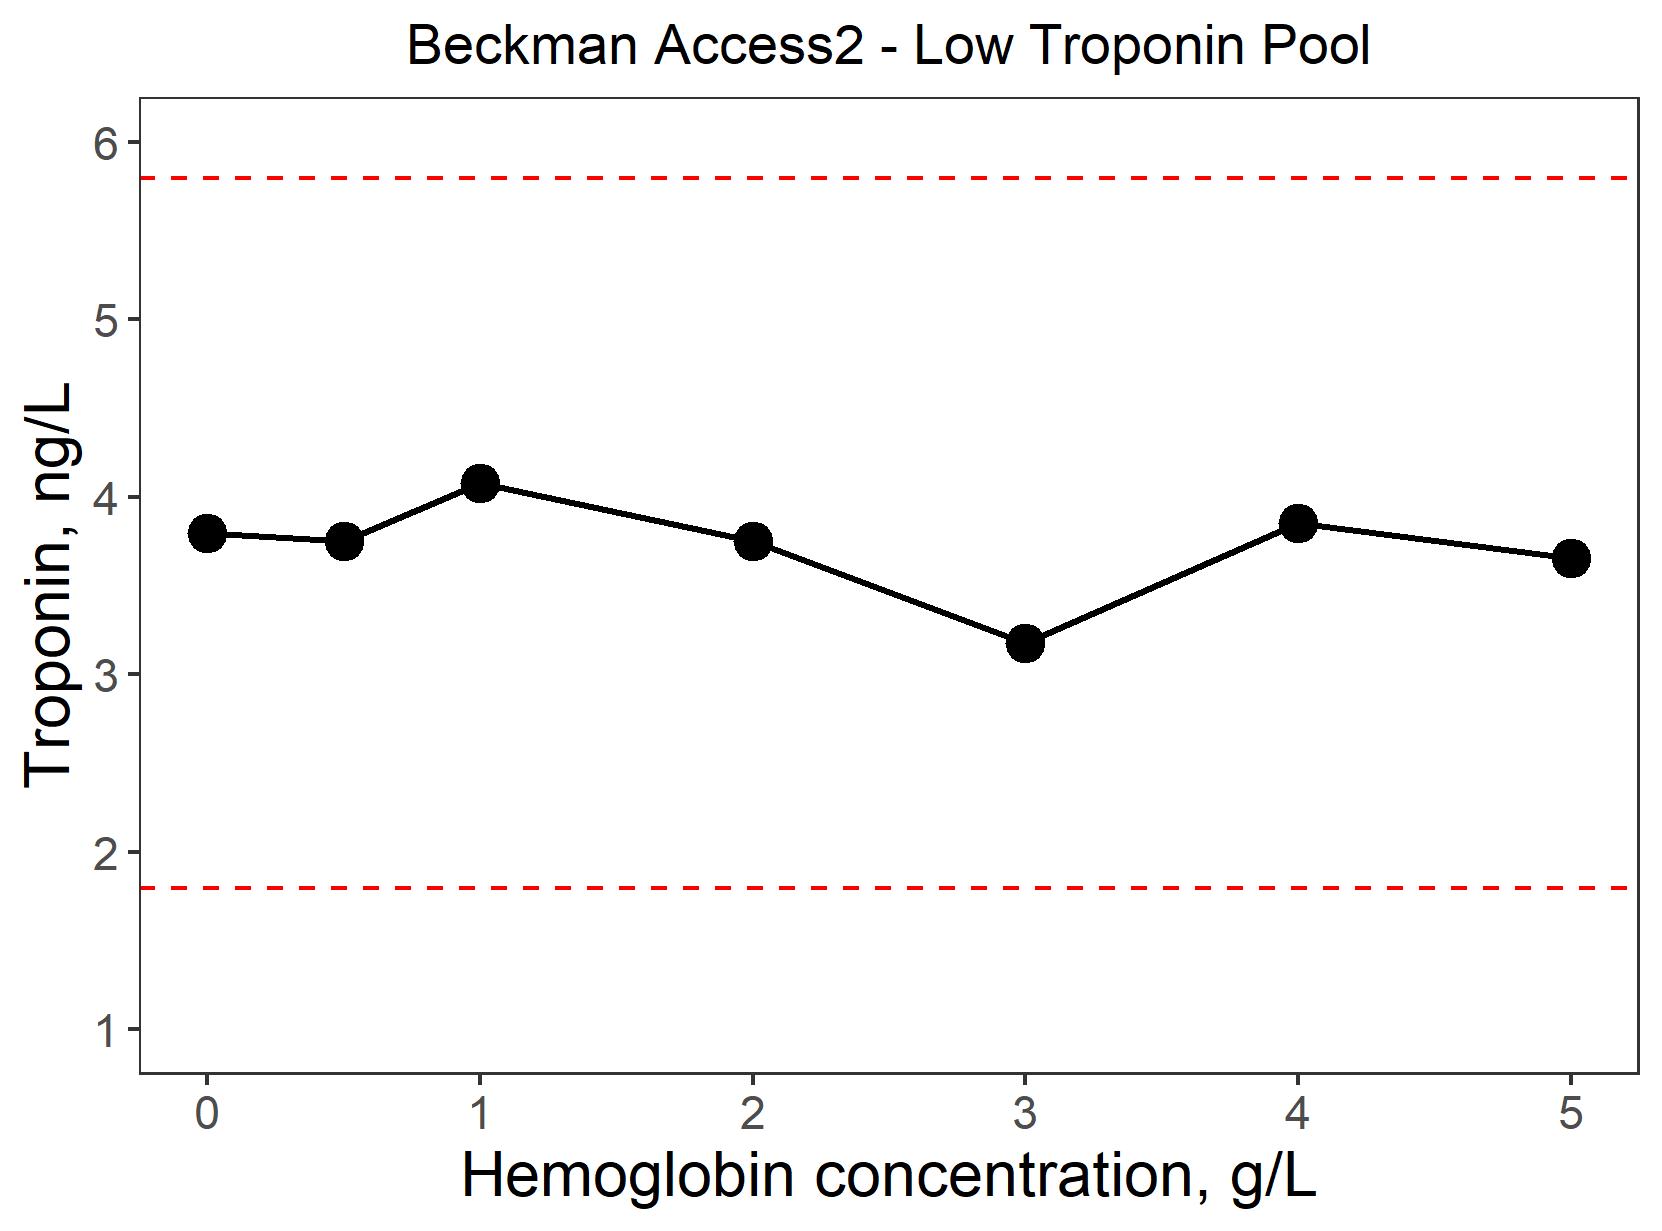

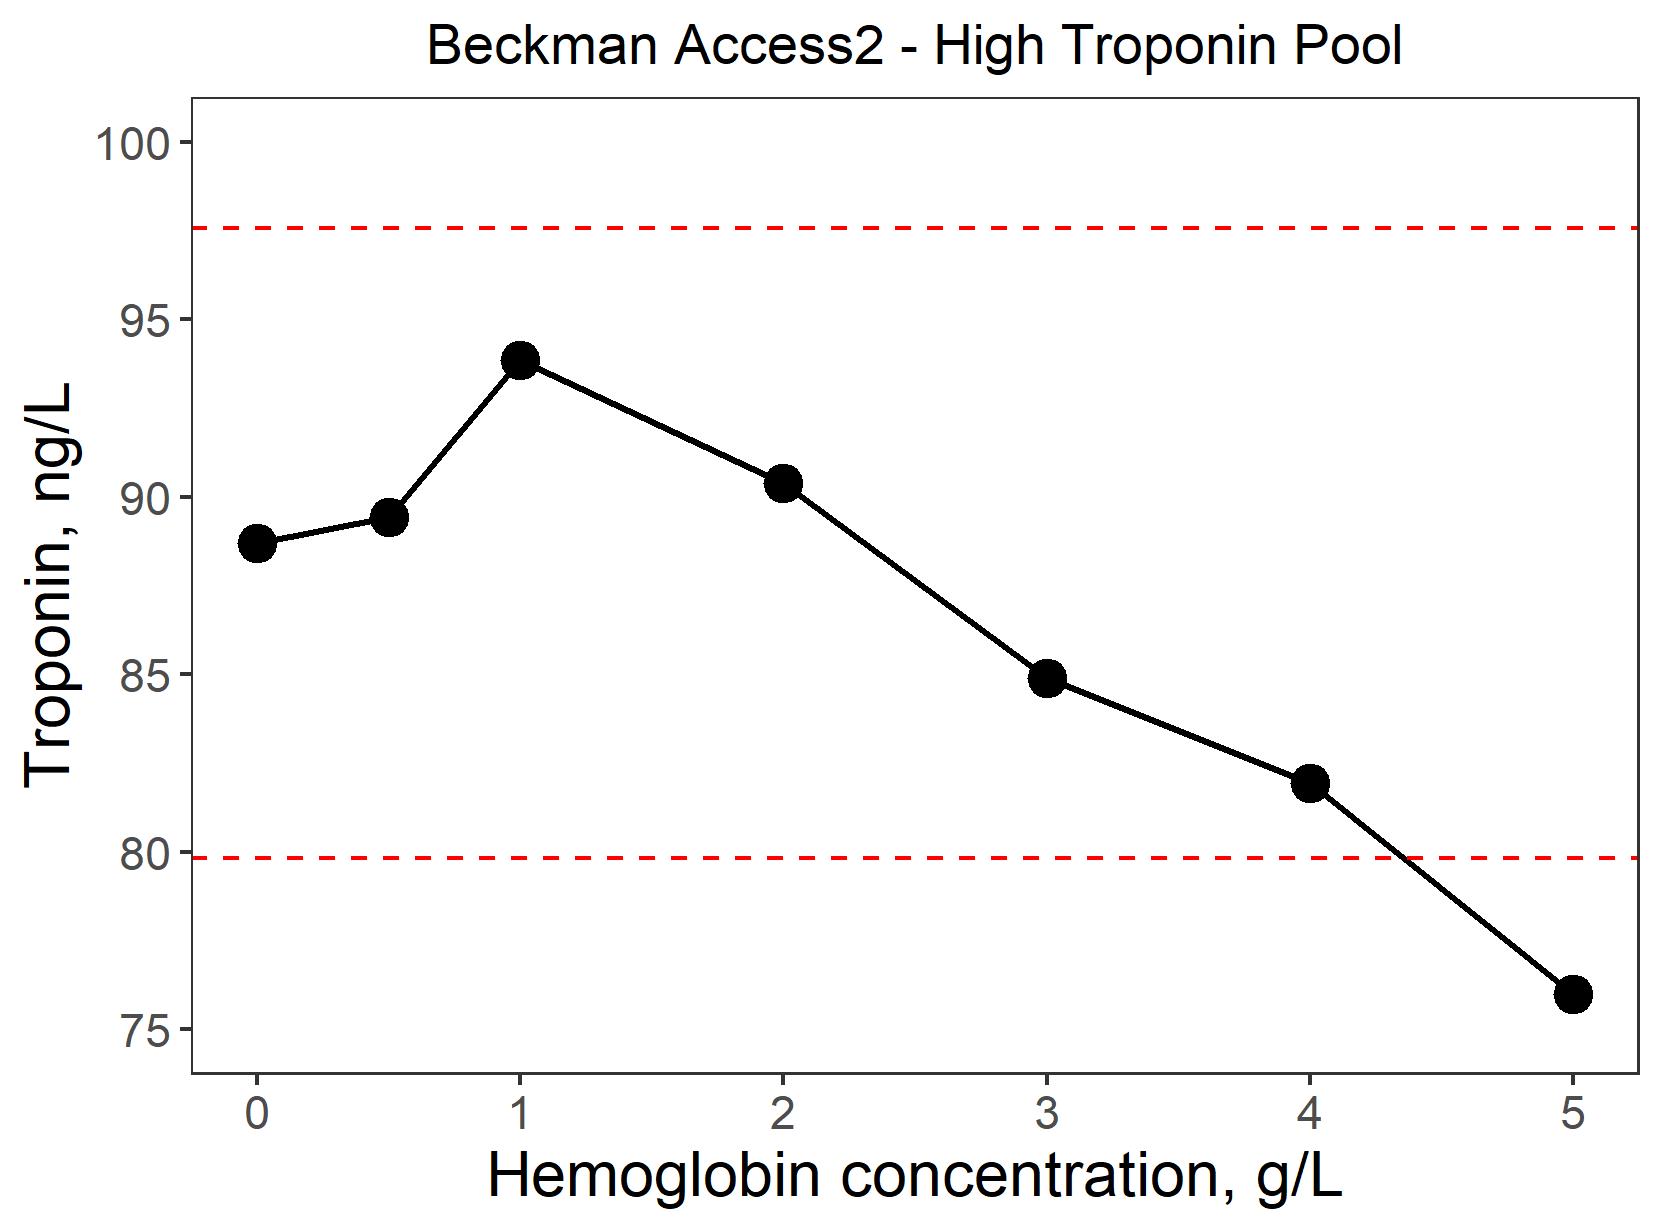


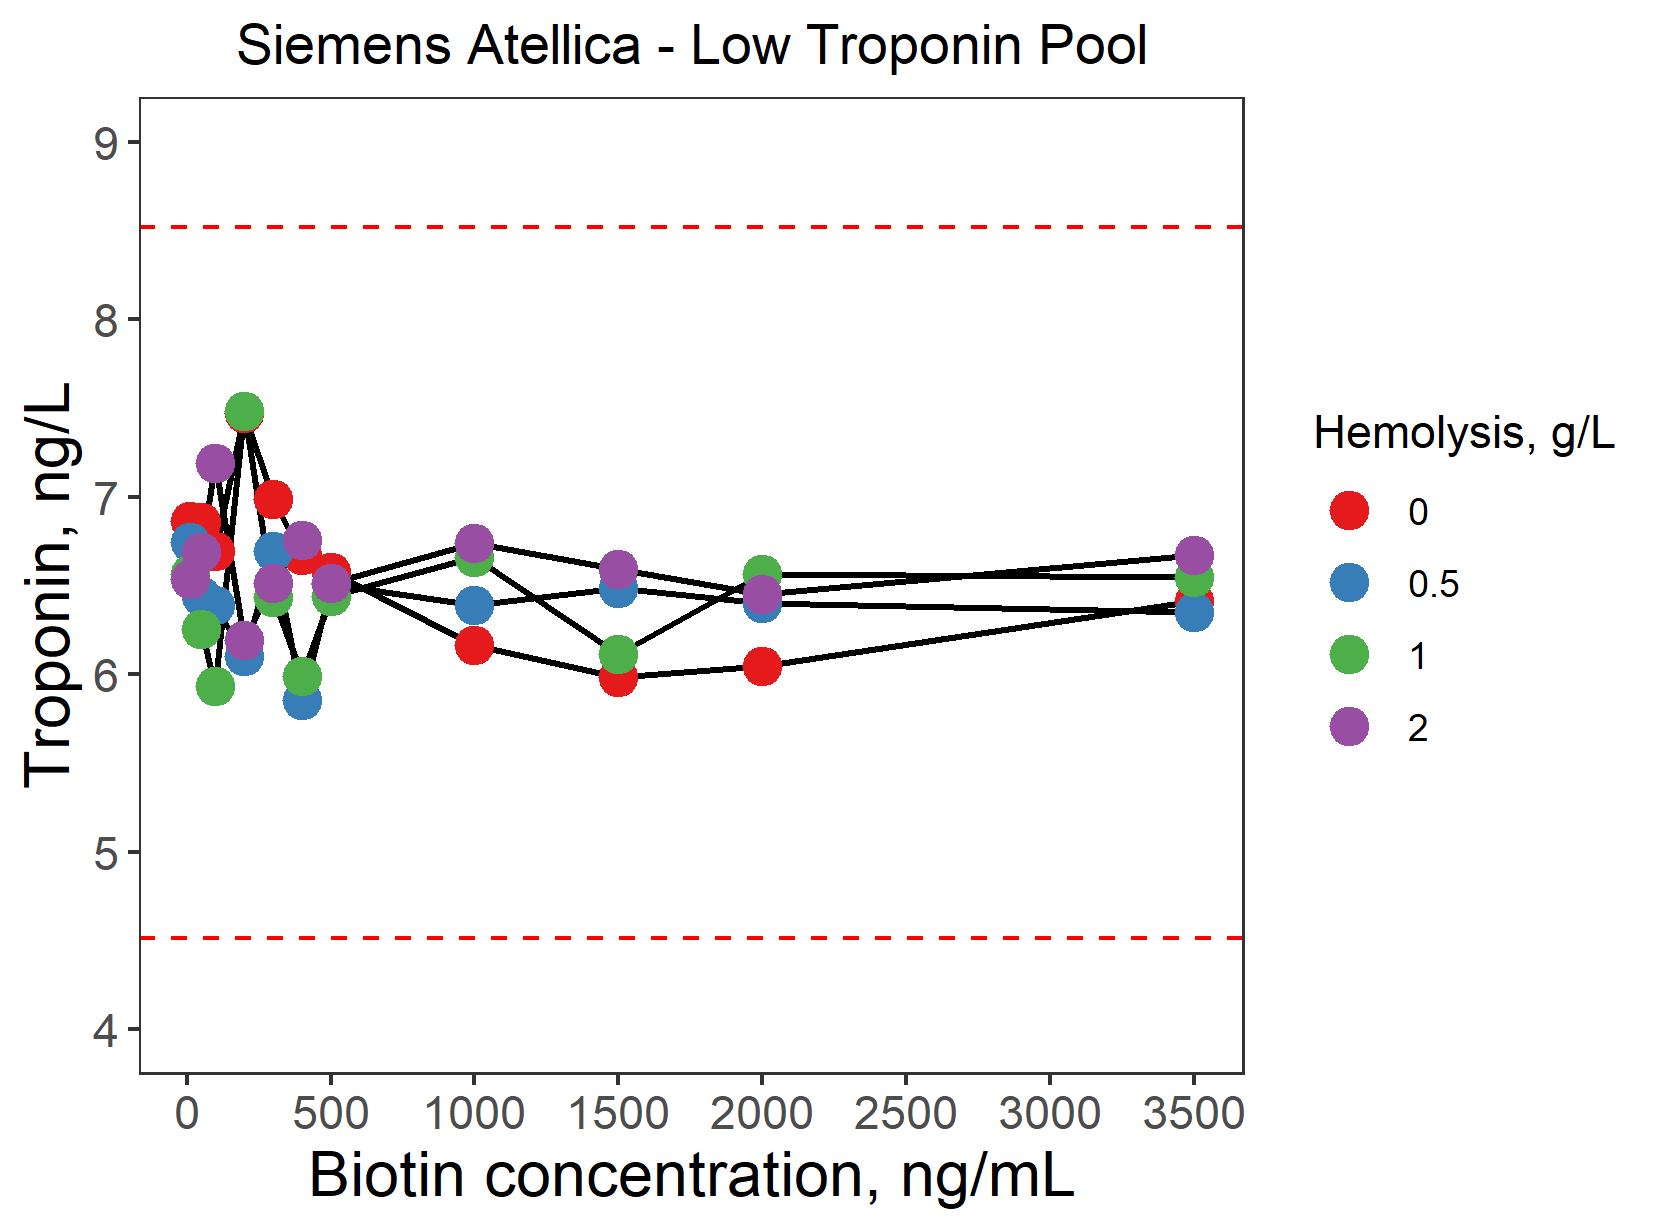


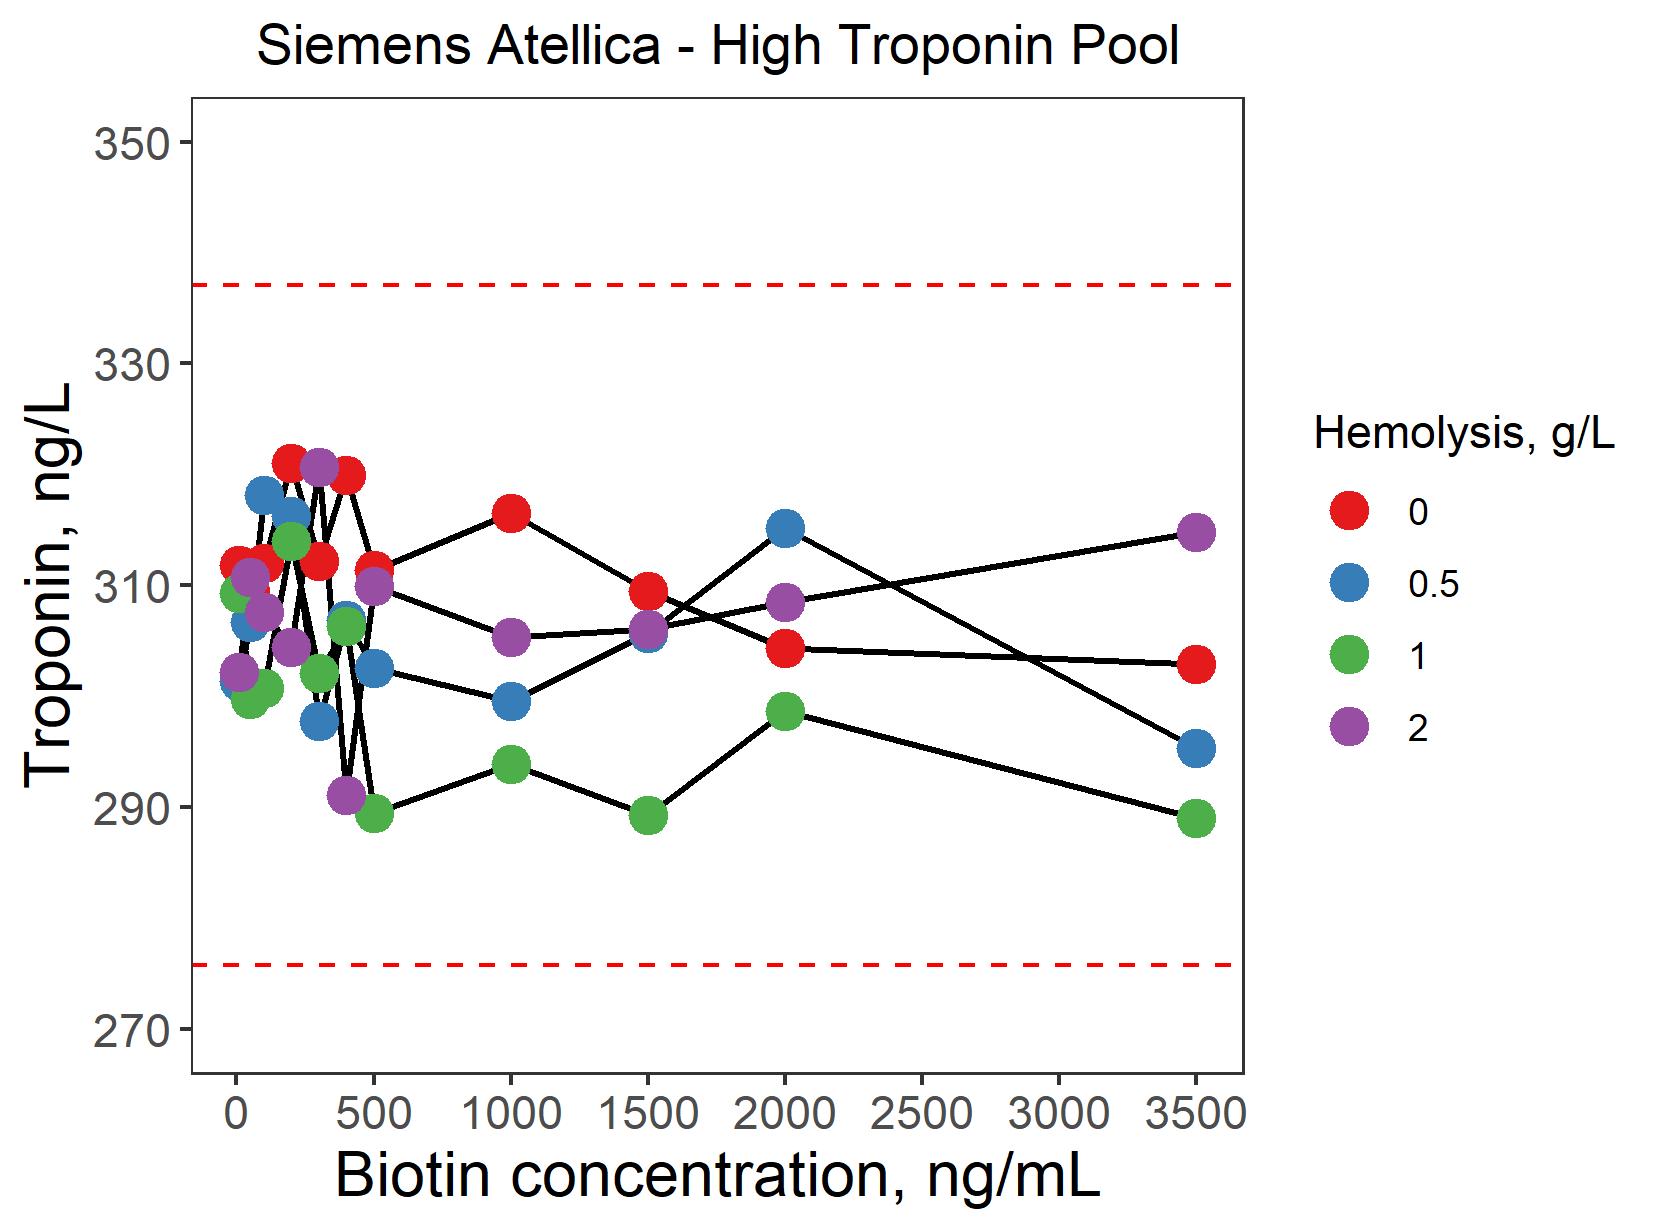


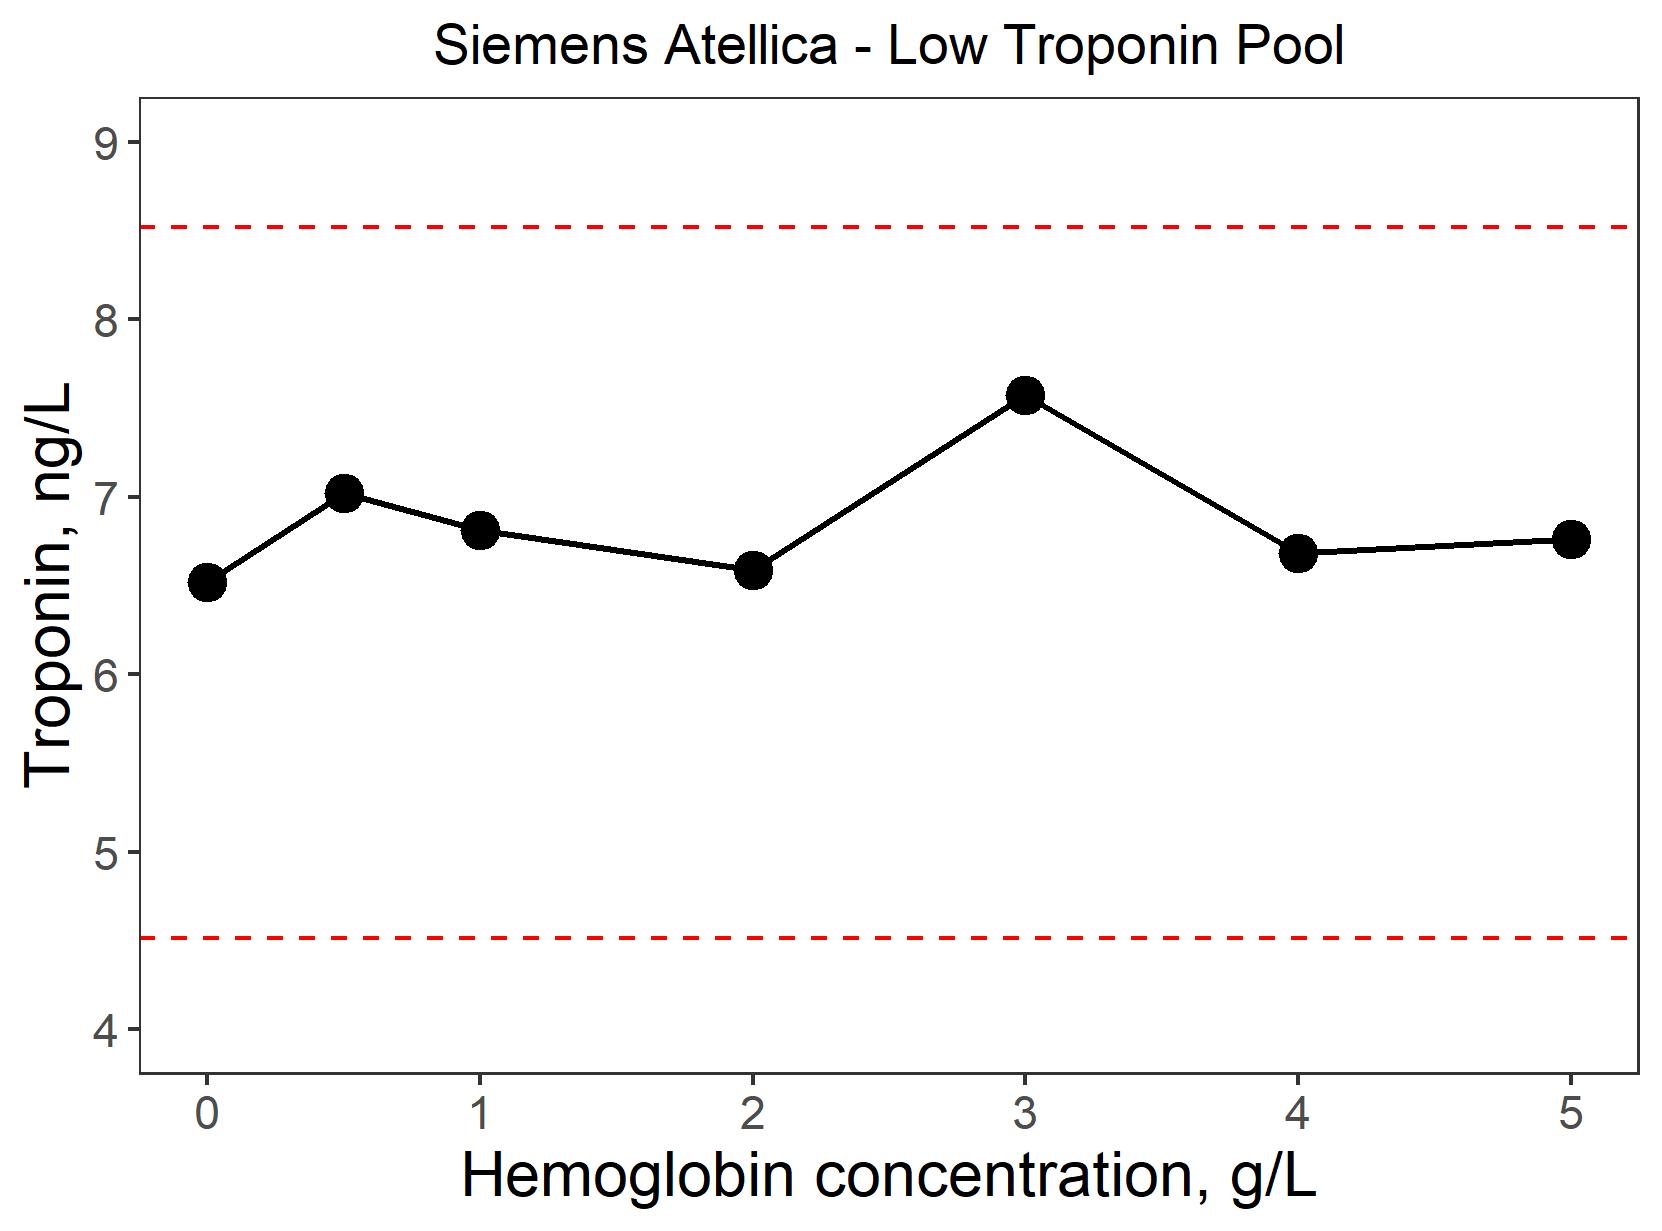


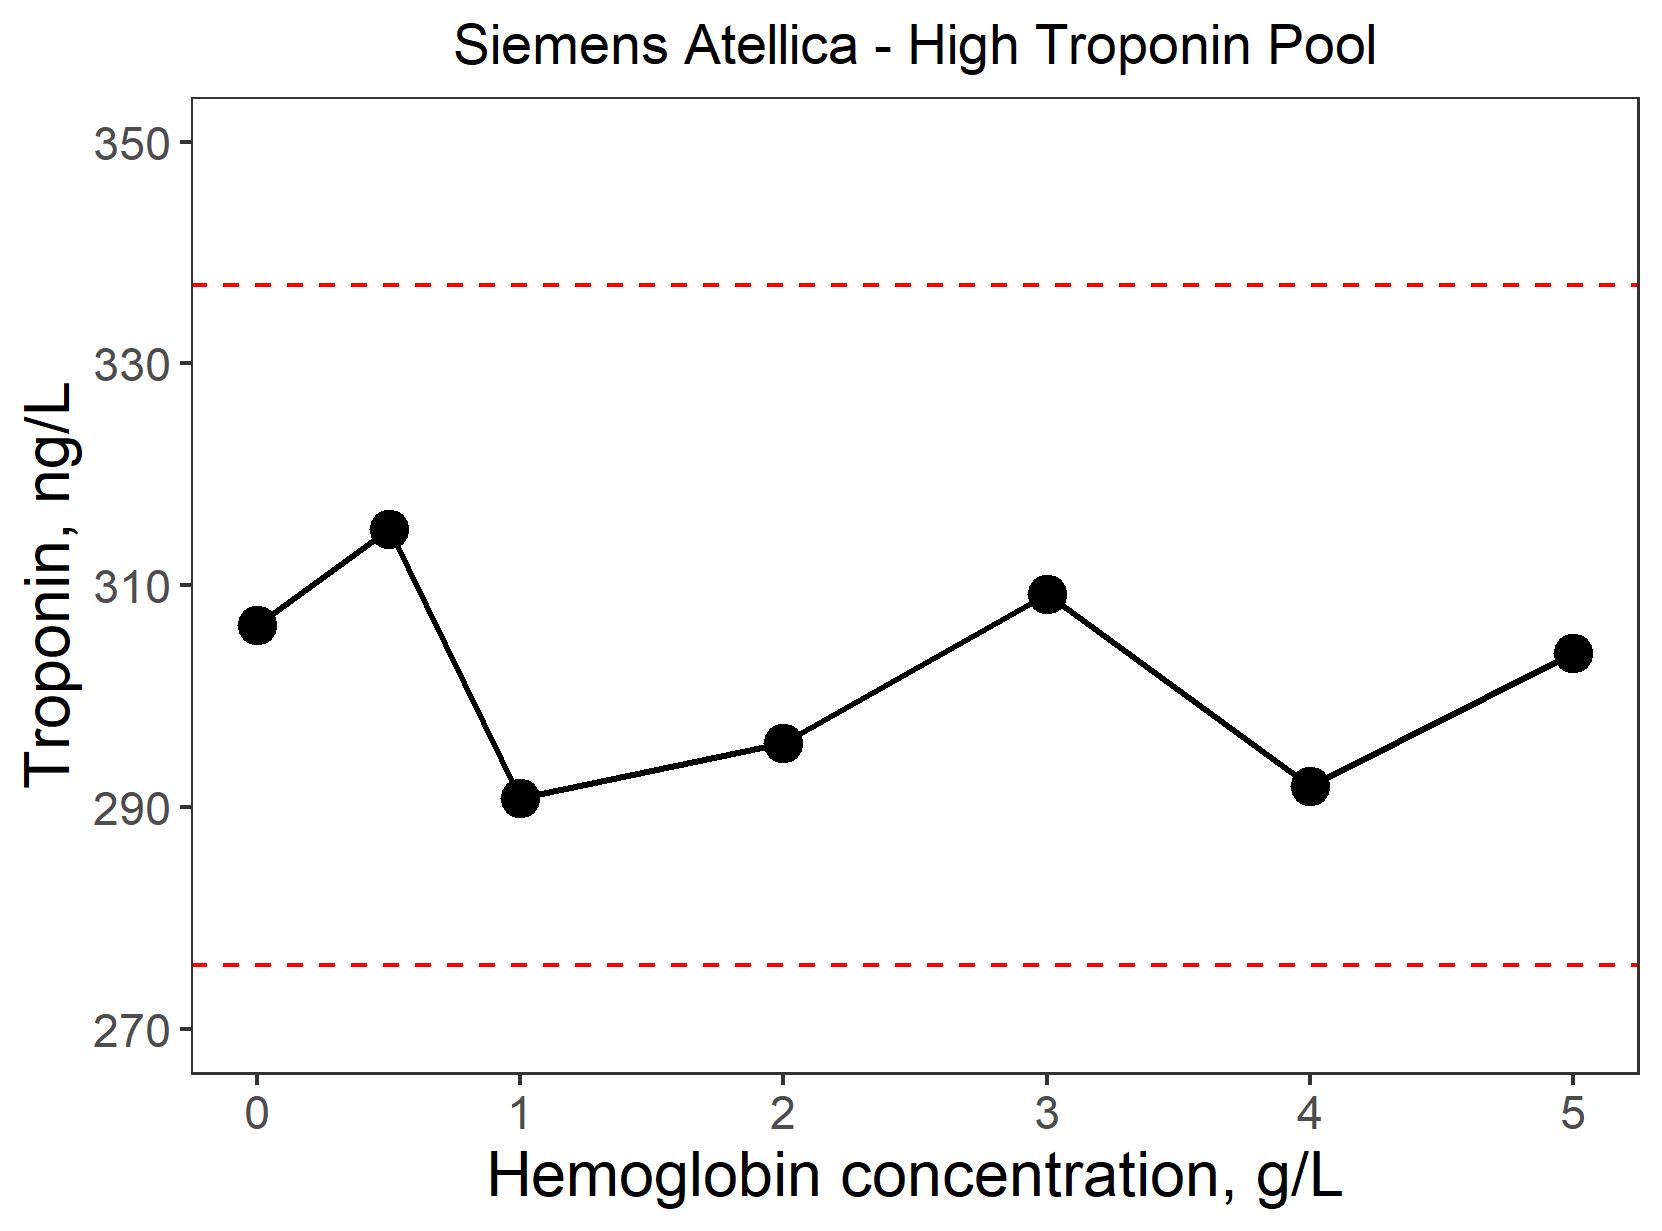


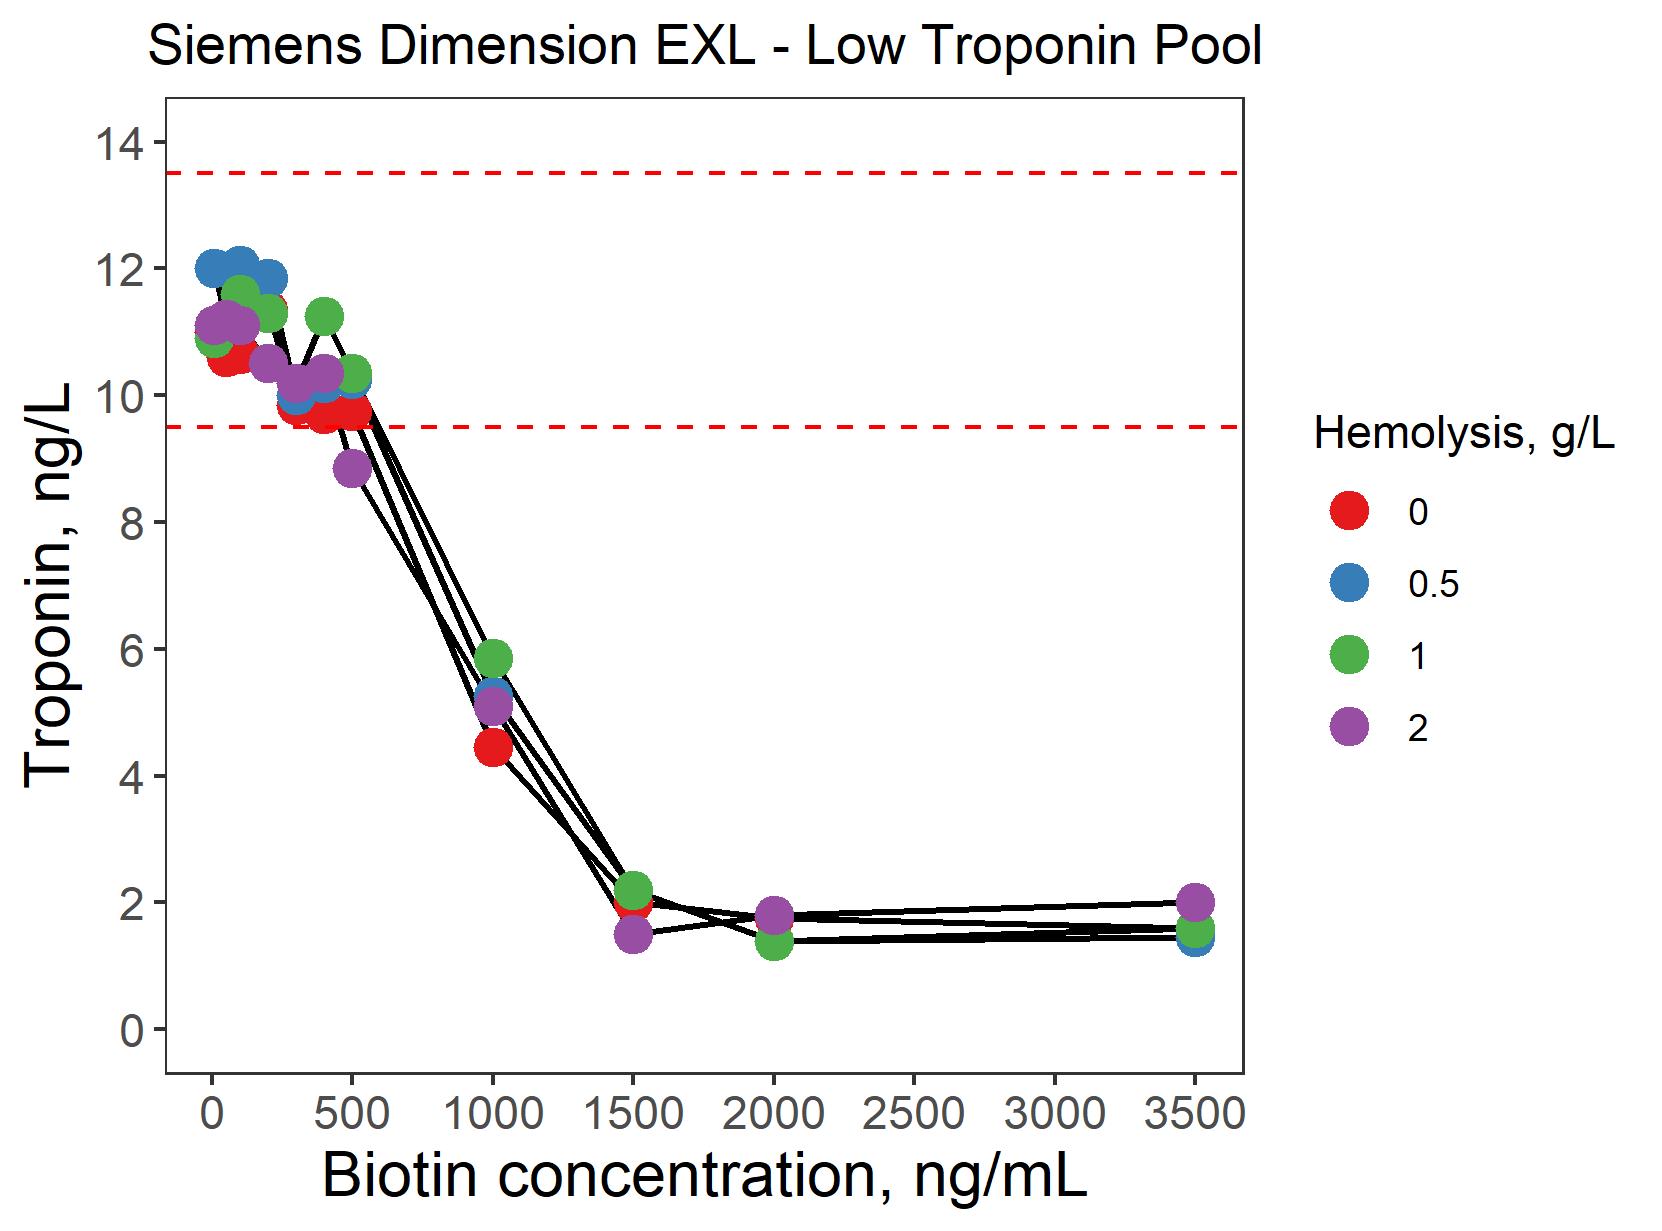


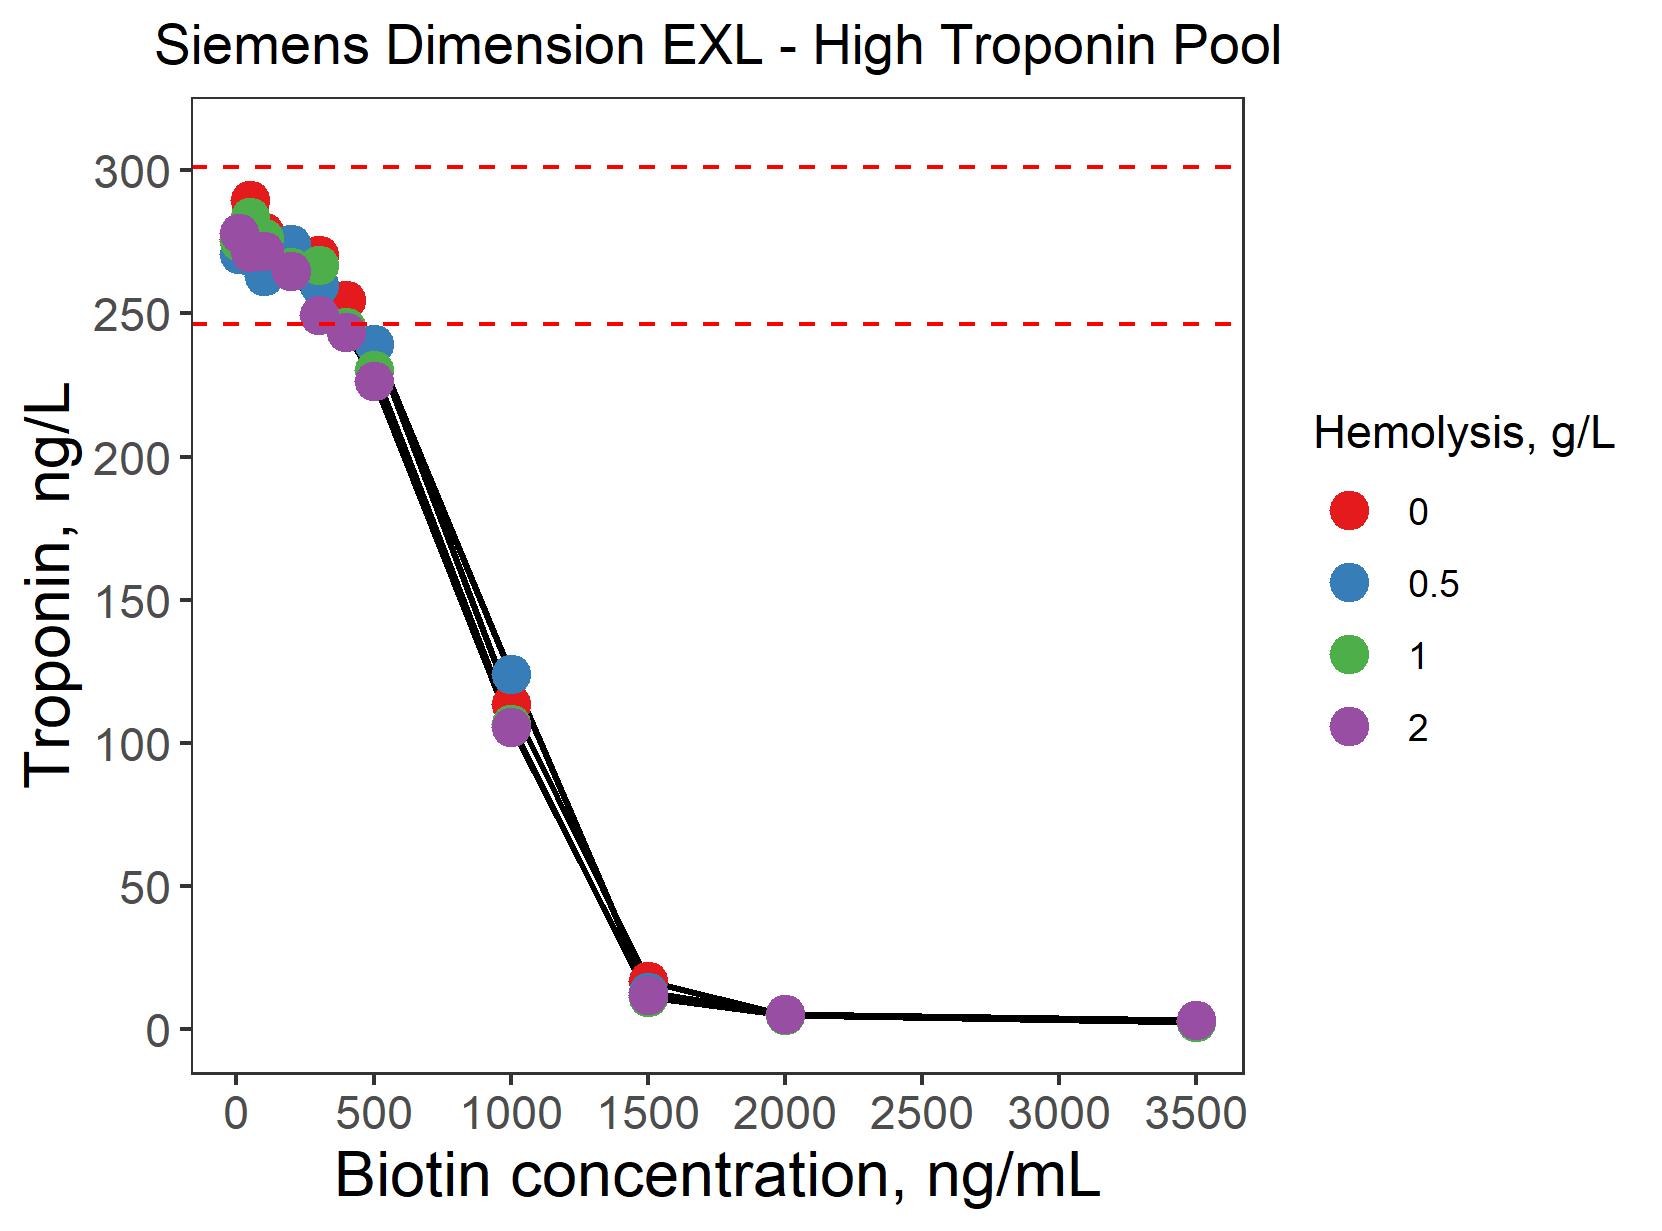


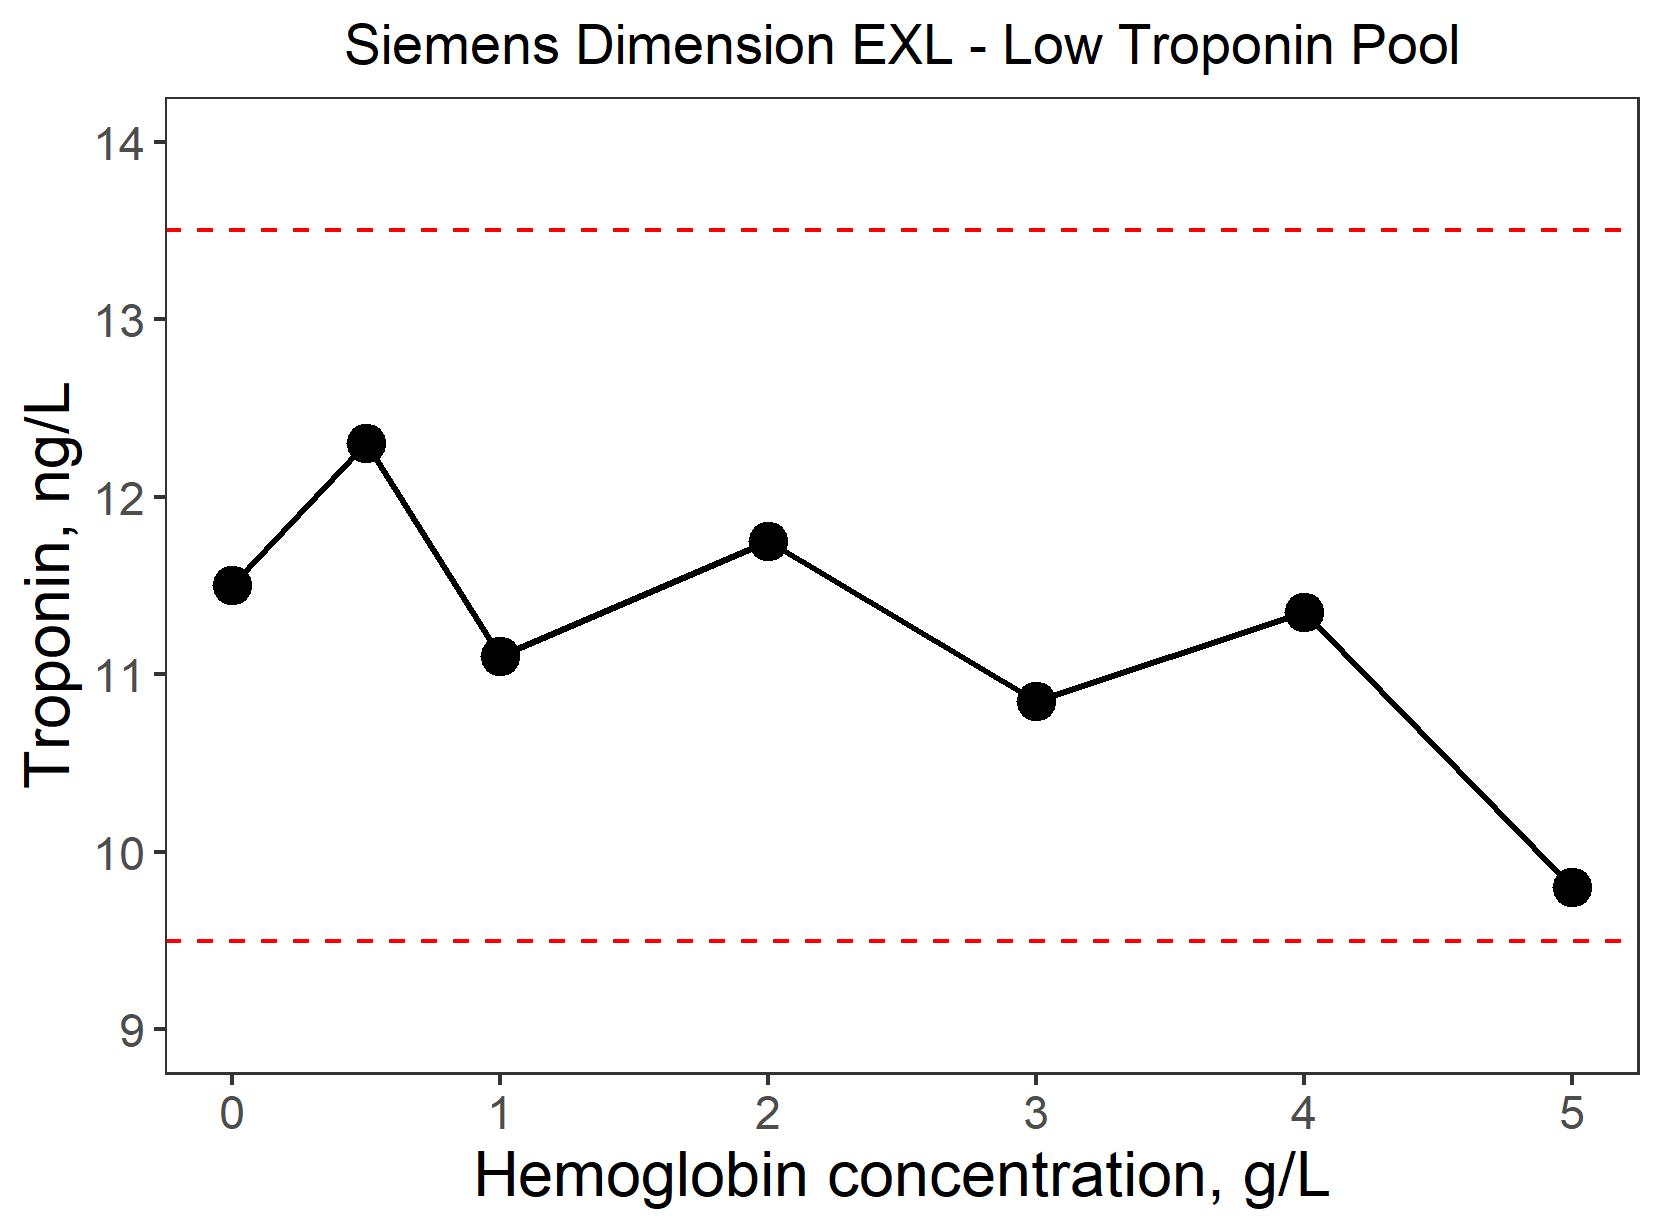

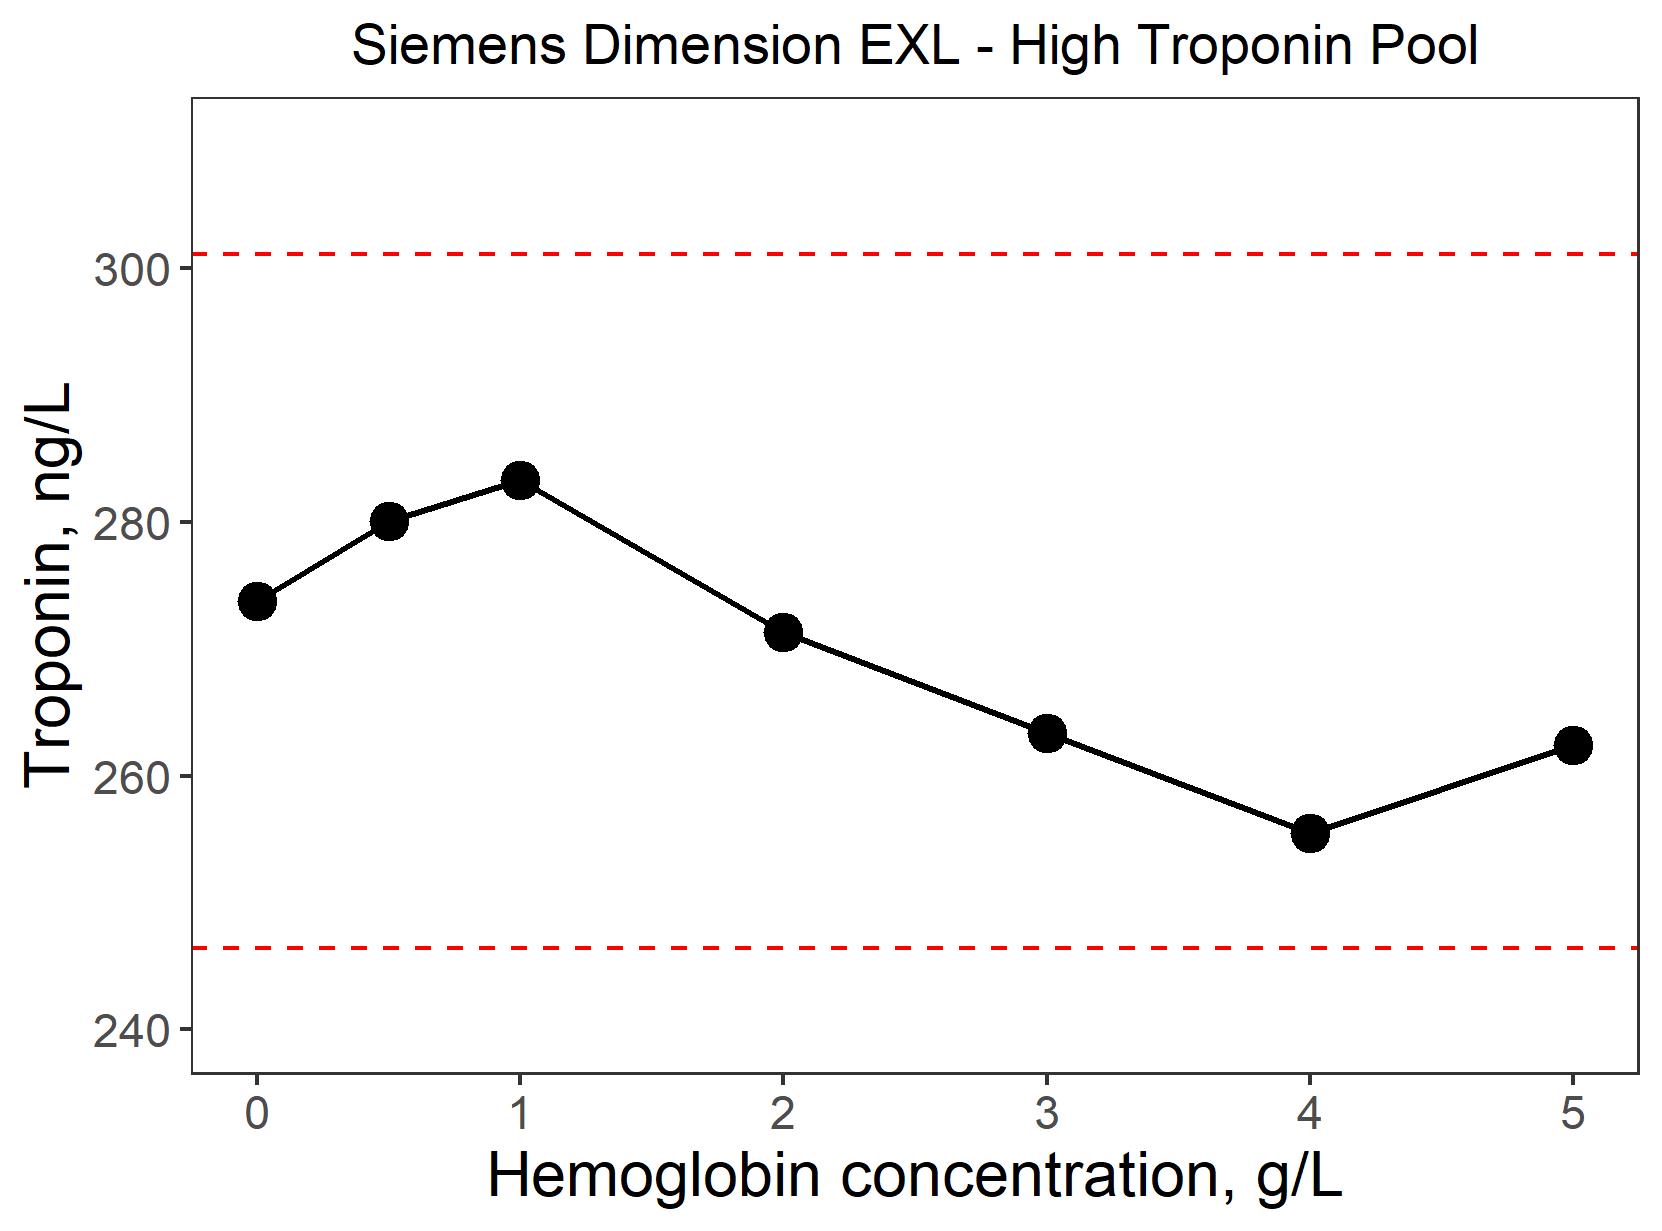


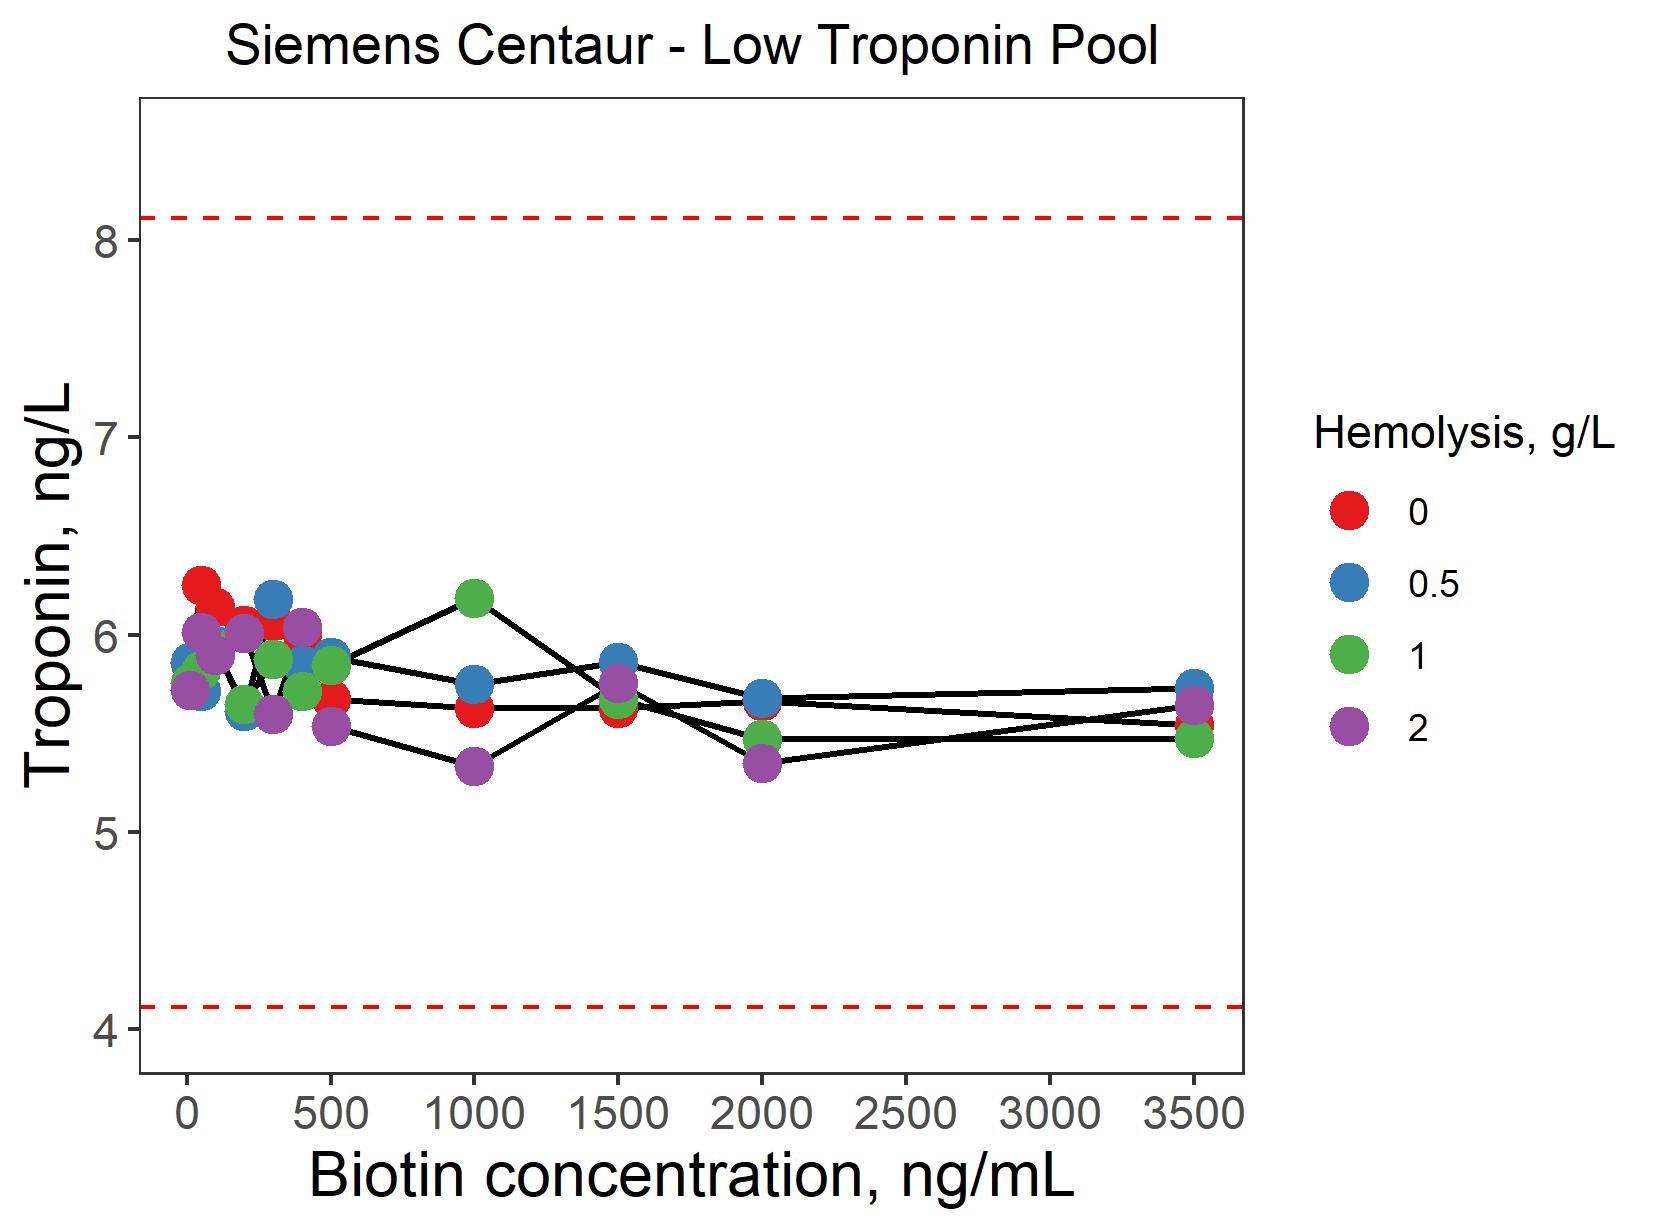

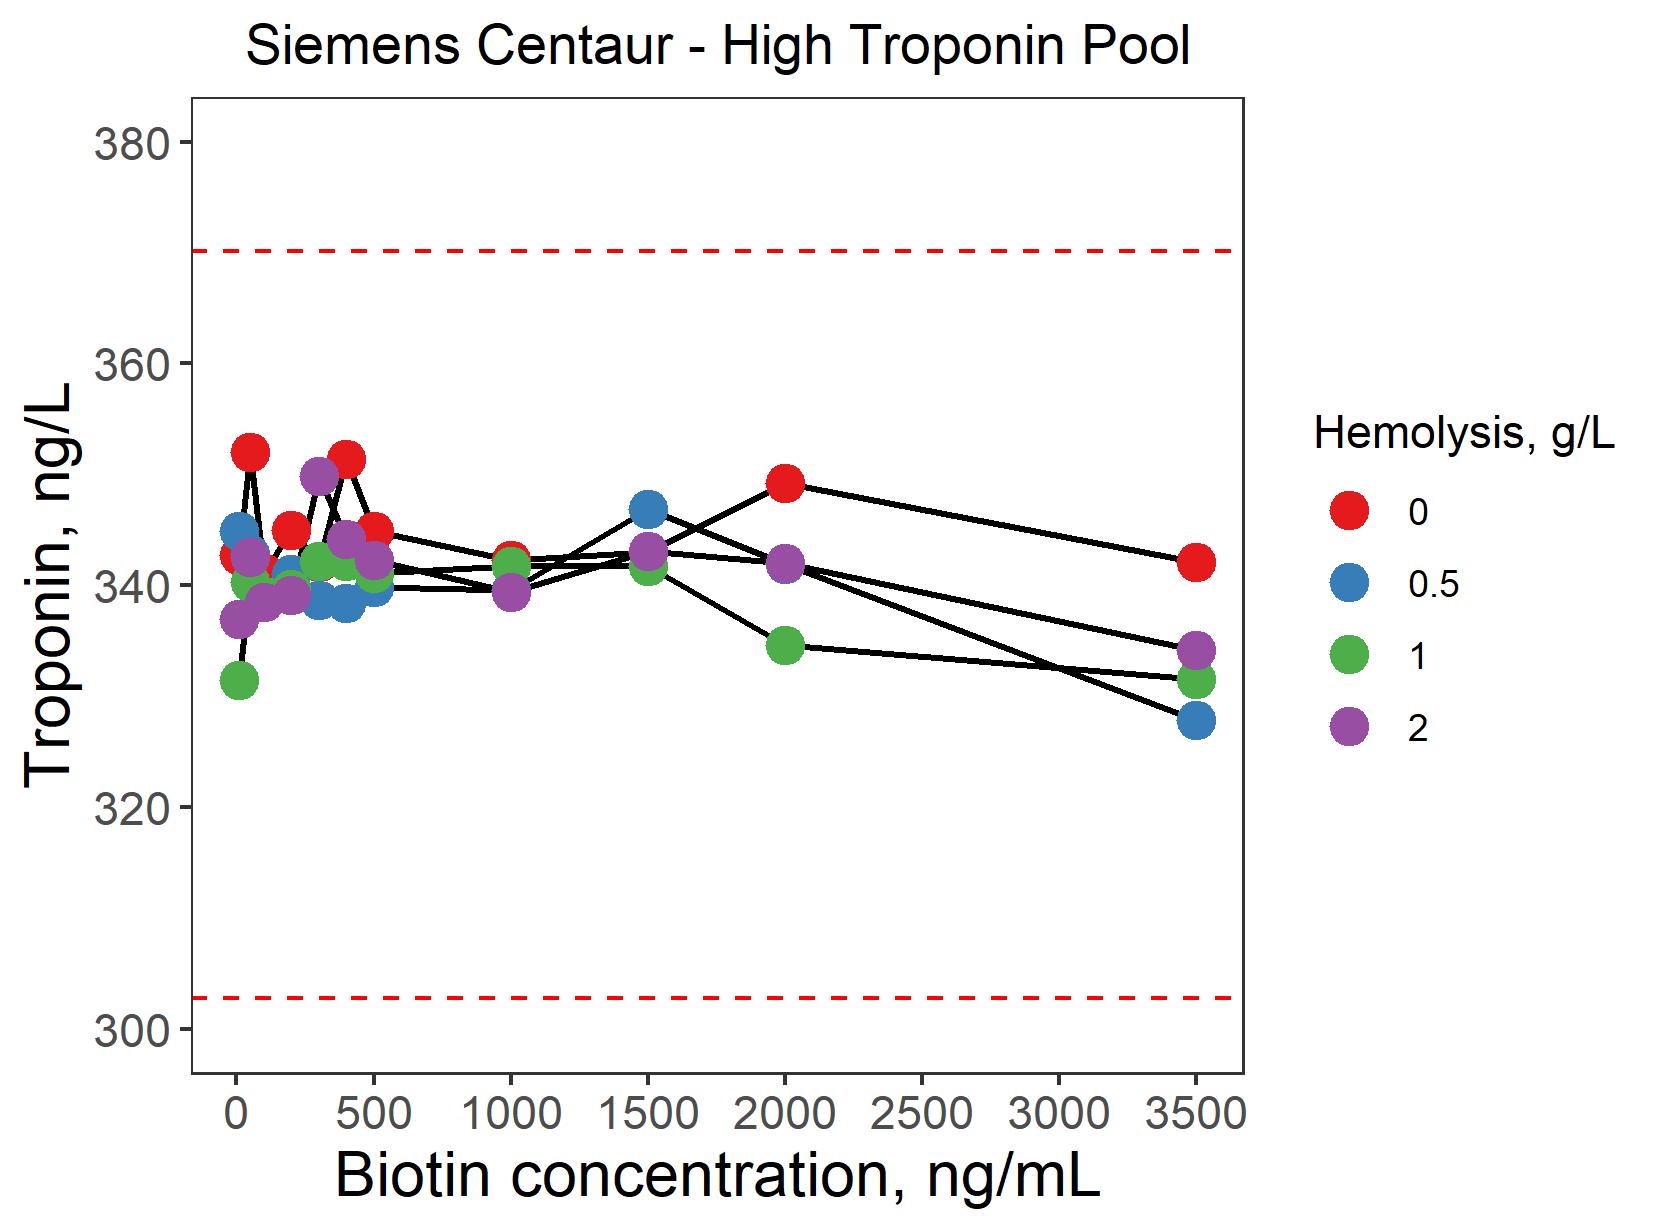

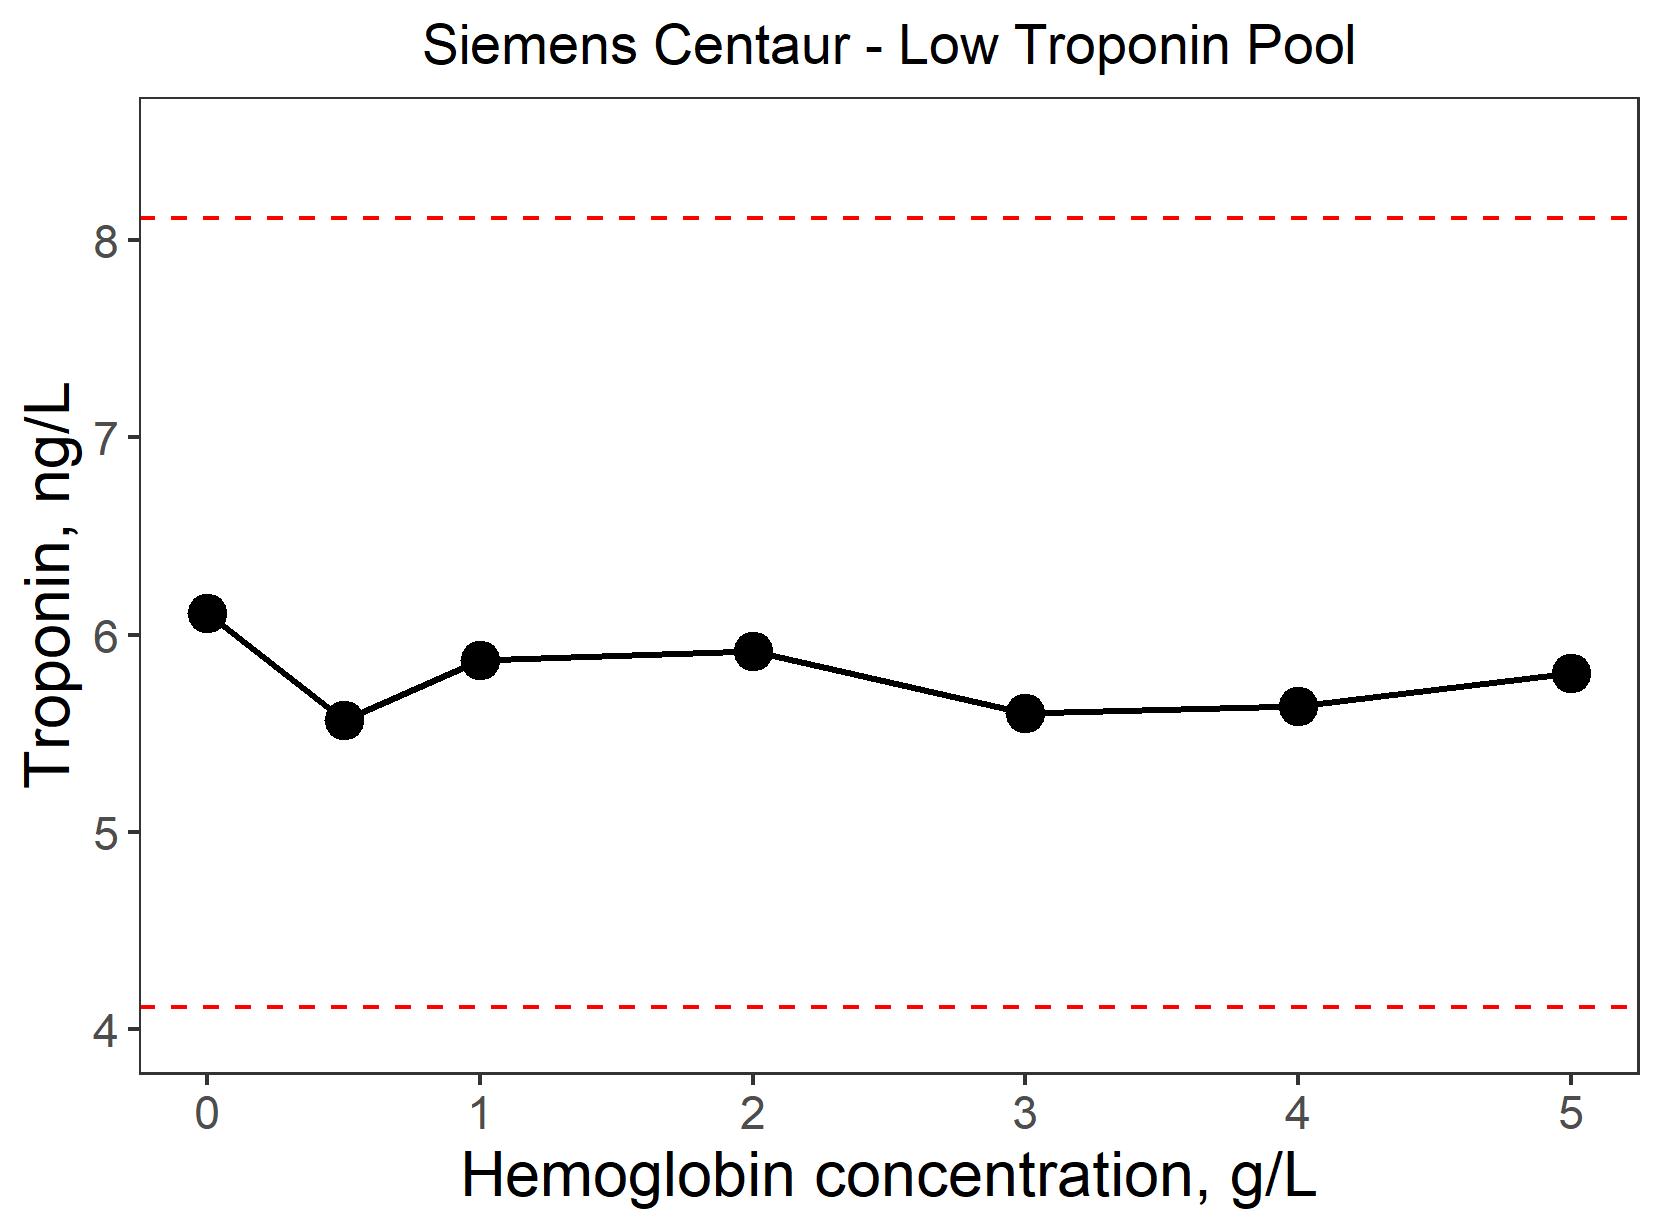

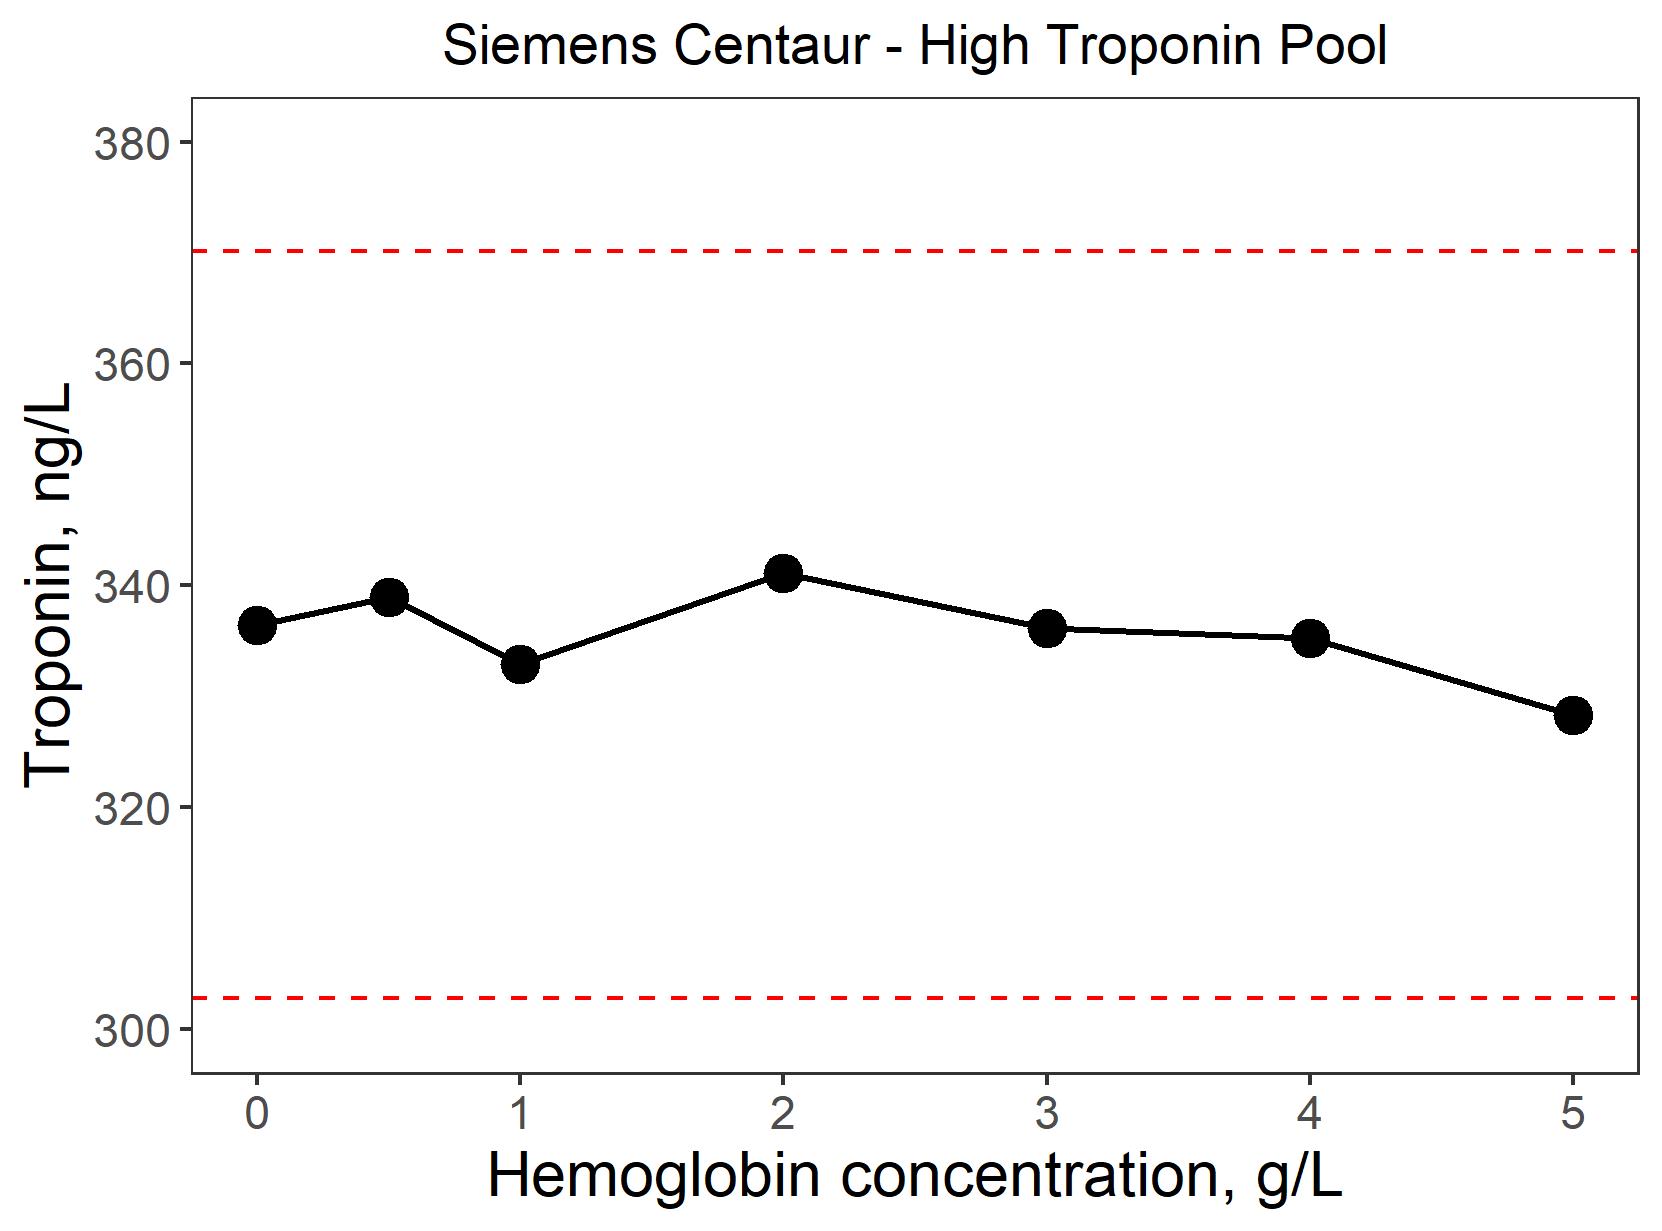

Supplement: Supplementary file 1 [file j_cclm-2021-0124_suppl.docx]
